# Supplementary material for: Radiofrequency denervation for chronic back pain: a systematic review and meta-analysis
Source: PubMed Central journal article supplement — BMJ Open. 2020 Jul 21;10(7):e035540. doi: 10.1136/bmjopen-2019-035540 (PMC7375436; doi:10.1136/bmjopen-2019-035540), 2020-07-21
Supplement: bmjopen-2019-035540.draft_revisions.pdf [file bmjopen-2019-035540.draft_revisions.pdf]

# BMJ Open

BMJ Open is committed to open peer review. As part of this commitment we make the peer review history of every article we publish publicly available.

When an article is published we post the peer reviewers' comments and the authors' responses online. We also post the versions of the paper that were used during peer review. These are the versions that the peer review comments apply to.

The versions of the paper that follow are the versions that were submitted during the peer review process. They are not the versions of record or the final published versions. They should not be cited or distributed as the published version of this manuscript.

BMJ Open is an open access journal and the full, final, typeset and author-corrected version of record of the manuscript is available on our site with no access controls, subscription charges or pay-per-view fees (<http://bmjopen.bmj.com>).

If you have any questions on BMJ Open's open peer review process please email [info.bmjopen@bmj.com](mailto:info.bmjopen@bmj.com)

# BMJ Open

## Radiofrequency denervation for chronic back pain: a systematic review and meta-analysis

|                               |                                                                                                                                                                                                                                                                                                                                                                                                                                            |
|-------------------------------|--------------------------------------------------------------------------------------------------------------------------------------------------------------------------------------------------------------------------------------------------------------------------------------------------------------------------------------------------------------------------------------------------------------------------------------------|
| Journal:                      | <i>BMJ Open</i>                                                                                                                                                                                                                                                                                                                                                                                                                            |
| Manuscript ID                 | bmjopen-2019-035540                                                                                                                                                                                                                                                                                                                                                                                                                        |
| Article Type:                 | Original research                                                                                                                                                                                                                                                                                                                                                                                                                          |
| Date Submitted by the Author: | 05-Nov-2019                                                                                                                                                                                                                                                                                                                                                                                                                                |
| Complete List of Authors:     | Chappell, Mary; Cambridgeshire County Council, Public Health Directorate<br>Lakshman, Raj; Cambridgeshire County Council, Public Health Directorate; University of Cambridge, Medical Research Council Epidemiology Unit<br>Trotter, Patrick; Cambridge University Hospitals NHS Foundation Trust<br>Abrahams, Mark; Cambridge University Hospitals NHS Foundation Trust<br>Lee, Michael; University of Cambridge, Division of Anaesthesia |
| Keywords:                     | Back pain < ORTHOPAEDIC & TRAUMA SURGERY, Rheumatology < INTERNAL MEDICINE, Neurology < INTERNAL MEDICINE, PAIN MANAGEMENT                                                                                                                                                                                                                                                                                                                 |
|                               |                                                                                                                                                                                                                                                                                                                                                                                                                                            |

SCHOLARONE™  
Manuscripts

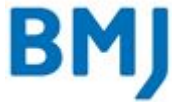

I, the Submitting Author has the right to grant and does grant on behalf of all authors of the Work (as defined in the below author licence), an exclusive licence and/or a non-exclusive licence for contributions from authors who are: i) UK Crown employees; ii) where BMJ has agreed a CC-BY licence shall apply, and/or iii) in accordance with the terms applicable for US Federal Government officers or employees acting as part of their official duties; on a worldwide, perpetual, irrevocable, royalty-free basis to BMJ Publishing Group Ltd ("BMJ") its licensees and where the relevant Journal is co-owned by BMJ to the co-owners of the Journal, to publish the Work in this journal and any other BMJ products and to exploit all rights, as set out in our [licence](#).

The Submitting Author accepts and understands that any supply made under these terms is made by BMJ to the Submitting Author unless you are acting as an employee on behalf of your employer or a postgraduate student of an affiliated institution which is paying any applicable article publishing charge ("APC") for Open Access articles. Where the Submitting Author wishes to make the Work available on an Open Access basis (and intends to pay the relevant APC), the terms of reuse of such Open Access shall be governed by a Creative Commons licence – details of these licences and which [Creative Commons](#) licence will apply to this Work are set out in our licence referred to above.

Other than as permitted in any relevant BMJ Author's Self Archiving Policies, I confirm this Work has not been accepted for publication elsewhere, is not being considered for publication elsewhere and does not duplicate material already published. I confirm all authors consent to publication of this Work and authorise the granting of this licence.

1  
2  
3 **Radiofrequency denervation for chronic back pain: a systematic review and**  
4 **meta-analysis**  
5  
6  
7

8 Mary E Chappell<sup>1</sup>, Raj Lakshman<sup>1,2</sup>, Patrick Trotter<sup>3</sup>, Mark J Abrahams<sup>3</sup>, Michael C  
9 Lee<sup>4</sup>  
10  
11

12  
13 <sup>1</sup>Public Health Directorate, Cambridgeshire County Council, Cambridge, UK  
14

15  
16 <sup>2</sup>Medical Research Council Epidemiology Unit, University of Cambridge, Cambridge  
17  
18 UK  
19

20  
21 <sup>3</sup>Cambridge University Hospitals NHS Foundation trust, Cambridge, UK  
22

23  
24 <sup>4</sup>Division of Anaesthesia, University of Cambridge, Cambridge, UK  
25  
26  
27  
28

29  
30 Correspondence to: Mary E Chappell, Public Health Directorate, Cambridgeshire  
31  
32 County Council, Cambridge CB3 0AP, UK. Tel. 01223 729037  
33

34  
35 Email [mary.chappell@cambridgeshire.gov.uk](mailto:mary.chappell@cambridgeshire.gov.uk)  
36  
37  
38  
39

40  
41 Word count:

42  
43 Abstract 205  
44

45  
46 Main text 4,080  
47  
48  
49  
50  
51  
52  
53  
54  
55  
56  
57  
58  
59  
60

## Abstract

Objectives: To assess the effectiveness of radiofrequency denervation of lumbosacral anatomical targets for the management of chronic back pain.

Design: Systematic review and meta-analysis of randomised controlled trials.

Methods: A database search (Medline, Medline in Process, Embase, CINHAL and the Cochrane library) was conducted to April 2019 for placebo or no-treatment controlled trials of radiofrequency denervation for the management of chronic back pain. Included trials were quality assessed using the Cochrane risk of bias tool and the quality of outcomes assessed using the GRADE approach. Meta-analysis was conducted to calculate mean difference in post-treatment pain score.

Results: Nineteen randomised controlled trials were included in the review. There appears to be short-term effectiveness (3-6 months) of radiofrequency denervation for a number of indications (facet joint, sacroiliac joint and inter-vertebral discs) but the placebo effect is large, additional intervention effect size is small (<1 on a 11 point (0-10) pain scale). Longer-term effectiveness is uncertain.

Conclusions: Radiofrequency denervation of lumbosacral targets is likely to have a small positive effect for the management of patients with chronic back pain. The quality of evidence for the majority of outcomes is low or very low quality and there is still a degree of uncertainty, particularly around the duration of effect.

1  
2  
3 Strengths and limitations of this study:  
4  
5

- 6 • This review brings together a number of recent trials with earlier trials so that  
7  
8 there is a sizable sum of evidence on which to assess the effectiveness of  
9  
10 radiofrequency denervation for back pain.  
11  
12
- 13 • Due to the invasive nature of the procedure, it is difficult to perform truly  
14  
15 patient or provider blinded trials and this brings some uncertainty around  
16  
17 findings.  
18  
19
- 20 • There is limited reporting of long-term outcomes for the effectiveness of  
21  
22 radiofrequency denervation.  
23  
24  
25  
26  
27  
28  
29  
30  
31  
32  
33  
34  
35  
36  
37  
38  
39  
40  
41  
42  
43  
44  
45  
46  
47  
48  
49  
50  
51  
52  
53  
54  
55  
56  
57  
58  
59  
60

## Introduction

Back pain is an extremely common symptom experienced by people of all ages, and can be attributed to a wide variety of disease processes.<sup>1,2</sup> Low back pain is now the leading cause of disability worldwide and back pain is associated with a substantial economic burden, with high medical and societal costs.<sup>3</sup> Studies have shown that a large proportion of medical costs come from hospital admissions and physical therapy for the management of back pain.<sup>4</sup> However, there are also indirect costs associated with chronic or recurrent back pain that are difficult to quantify relating to work absenteeism and related productivity.<sup>1,3,4</sup> In many cases, back pain is non-specific, or structural pathology amenable to surgical correction cannot be identified.<sup>5-7</sup> Hence, patients and practitioners continue to seek non-surgical alternatives for the management of back pain.

Radiofrequency denervation (RD) involves the application of an alternating electric current (250 to 500kHz) via a needle probe to induce a highly localised rise in tissue temperature at the needle tip.<sup>8</sup> The needle tip is usually placed under fluoroscopic guidance to enable selective ablation of sensory nerve branches that supply facet joints, sacroiliac joint or other structures that comprise the lumbosacral spine. RD would therefore offer relief of pain by attenuating sensory signals from the lumbosacral spine.<sup>9</sup>

Despite its use for over 20 years,<sup>10</sup> the effectiveness of RD targeted at the anatomy of lumbosacral spine is not yet established, with randomised controlled trials (RCTs) continuing to be performed. A number of trials have been published since the publication of the last high quality review in 2015<sup>11</sup> and our systematic review aimed to bring together this evidence in an attempt to evaluate whether RD is an effective intervention for the management of chronic non-specific back pain.

## Materials and Methods

### *Search strategy*

A search was conducted in Medline, Medline in Process, Embase, CINHAL and the Cochrane library from January 2014 to April 2019 (Appendix 1). Previous systematic reviews were used to obtain additional relevant studies published pre 2014.

### *Inclusion criteria*

RCTs comparing RD of the spine with a control in patients with back pain with or without sciatica were included. Only trials of radiofrequency procedures for the purpose of ablating or denaturing sensory nerve branches or nociceptors that supply the lumbosacral spine were considered for inclusion. Trials of pulsed RF,<sup>12</sup> or other forms of 'neuromodulatory' procedures that do not aim to ablate or denature these targets, were excluded from the review. Control groups where there was no active treatment were considered for inclusion but trials with potentially effective comparators e.g. corticosteroid injections, were excluded. Only trials of patients with back pain without a definite or surgically remediable cause (chronic non-specific back pain) were included in the review. The outcome for the review was patient-reported pain score e.g. Visual Analogue Scale or Numeric Rating Scale.

### *Data collection and quality assessment*

Trial characteristics were recorded from included studies. Study results were extracted independently by two authors (MC, PT), with any disagreements resolved by consensus. The overall strength of evidence was assessed using the GRADE approach.<sup>13</sup> Risk of bias was assessed using the Cochrane Risk of Bias tool.<sup>14</sup> Any outcome where more than half of trials were considered to have a high or unclear risk of bias was downgraded. Outcomes were also downgraded where heterogeneity



1  
2  
3 in the meta-analysis was greater than 50%. Optimal sample size was taken to be 85  
4  
5 participants per study arm (as calculated in the Juch 2017 trial<sup>15</sup>) and studies with  
6  
7 less than 170 participants, and/or where the 95% confidence intervals included the  
8  
9 line of no effect, were downgraded for imprecision. Publication bias was assessed  
10  
11 using funnel plots and outcomes downgraded where there was a high certainty of  
12  
13 publication bias.  
14  
15

### 16 17 *Data analysis*

18  
19  
20 Meta-analyses were conducted in RevMan with fixed effects models. Pain score data  
21  
22 were reported on a 0-10 point scale (Visual Analogue Scale or Numeric Rating  
23  
24 Scale) in all studies and the mean difference was therefore calculated without  
25  
26 standardisation as done in the previous Cochrane review.<sup>11</sup> Studies with different  
27  
28 spinal targets e.g. facet joints, sacroiliac joints or inter-vertebrae disc, were  
29  
30 separated in the analysis. For facet joint pain, a plot of treatment versus no  
31  
32 treatment/sham was produced by fixed effects meta-analysis of scores for each arm.  
33  
34 A sensitivity analysis was conducted to check the validity of findings by removing  
35  
36 studies considered to have a particularly high risk of bias. Subgroup analysis to  
37  
38 explore study heterogeneity was not conducted because of the small number of  
39  
40 studies and high likelihood of reaching spurious conclusions.  
41  
42  
43  
44  
45

## 46 **Results**

### 47 48 *Study characteristics*

49  
50  
51 The search identified 922 citations of which 229 were duplicates. Studies were  
52  
53 excluded as shown in figure 1. Of the 693 citations reviewed 8 new trials were  
54  
55 identified as well as 11 from a previous Cochrane review.<sup>11</sup> Exclusions were made  
56  
57 as shown in figure 1. Nineteen trials were included in the review and their  
58  
59  
60

1  
2  
3 characteristics are shown in appendix 2. Trials investigated the effectiveness of RD  
4 of the facet joint (supplied by medial branch of the dorsal spinal ramus),<sup>15–23</sup> the  
5 sacroiliac joints,<sup>15,24–27</sup> the intervertebral discs<sup>28–32</sup>, or vertebrae end-plate (supplied  
6 by the basivertebral nerve).<sup>33</sup> The majority of trials used a sham control group but  
7 one large trial compared RD with no treatment (both groups received an exercise  
8 program) and one small trial compared RD plus conventional medical with  
9 conventional medical management alone (including self-care, medications and  
10 physical and cognitive therapy).  
11  
12  
13  
14  
15  
16  
17  
18  
19  
20  
21

### 22 *Study quality*

23  
24 Sham-controlled trials generally appear to have conducted adequate randomisation  
25 but allocation concealment was often unclear. Processes were in place to blind  
26 patients and providers and outcome assessors. In some trials maintenance of  
27 blinding was unclear as it was evident that patients undergoing sham procedures  
28 were offered RD in case of sham treatment failure. In these cases, blinding would  
29 have been broken. Most trials did not report dropouts and there was unclear risk of  
30 attrition bias. The outcome for this review was pain score and this was reported in all  
31 trials and reporting bias was not considered to be an issue in the review. Four trials  
32 were identified as having high risk of bias and were removed in the sensitivity  
33 analysis.<sup>16,18,23,24</sup>  
34  
35  
36  
37  
38  
39  
40  
41  
42  
43  
44  
45  
46  
47

### 48 *Overall quality of the evidence*

49  
50 The majority of outcomes were graded down for imprecision and all outcomes were  
51 downgraded for potential risk of bias. Consequently almost all outcomes were  
52 graded as low quality. However, in some cases, high heterogeneity was also present  
53 and these outcomes were graded as very low quality. Publication bias was  
54  
55  
56  
57  
58  
59  
60

1  
2  
3 suggested by asymmetry in a number of the funnel plots. However, there was  
4  
5 uncertainty due to the small numbers of studies and outcomes were not graded  
6  
7 down for publication bias.  
8  
9

### 10 *Study findings*

11  
12  
13 Results of the meta-analyses are shown in table 1.  
14  
15

#### 16 *RD of the facet joints*

17  
18  
19 Meta-analysis of pain scores at 1-3 months post procedure (longest time point used  
20  
21 for studies with multiple time points) (marked on a 0-10 scale) is shown in figure 2  
22  
23 and table 1. The effect size was significant and similar when all trials were included  
24  
25 (7 trials, MD -0.48, CI -0.81, -0.15) or where just the sham-controlled trials were  
26  
27 included (6 trials, MD -0.51, CI -0.90, -0.11). At six and twelve months after the  
28  
29 procedure, there was still a significant effect but the effect size was lower for all trials  
30  
31 compared with sham-controlled trials only (table 1). A plot of change in meta-  
32  
33 analysed pain score over time after the procedure for facet joint RD and control  
34  
35 groups is shown in figure 3. When this was plotted with sham-controlled trials alone,  
36  
37 a similar pattern was observed (available on request).  
38  
39  
40  
41

#### 42 *RD of the sacroiliac joints*

43  
44  
45 Figure 4 shows the meta-analysis of trials for pain score at 1-3 months (longest time  
46  
47 point used for studies with multiple time points). There was a significant effect of RD  
48  
49 for the analysis including all trials (5 trials, MD -0.97, CI -1.38, -0.57) or just sham-  
50  
51 controlled trials (4 trials, MD -1.13, CI -1.63, -0.63). Only one trial<sup>15</sup> assessed  
52  
53 outcome at later time points and this showed no significant difference compared to a  
54  
55 no treatment control (table 1).  
56  
57  
58  
59  
60

### *RD of the intervertebral discs*

Pain score at 1-3 months post-treatment was significantly lower for RD compared with control in all trials (4 trials, MD -0.98, CI -1.62, -0.33) or just sham-controlled trials (3 trials, MD -0.63, CI -1.36, 0.10) (figure 5). The effect was still significant at 6 months (table 1).

### *RD of the vertebrae body and end plate*

One recent trial of RD for vertebrae body and end plate (basivertebral nerve ablation)<sup>33</sup> did not show significant benefits of RD compared with sham at 3, 6 or 12 months (table 1).

### *Sensitivity analysis*

Four studies were removed in the sensitivity analysis due to a high risk of methodological bias<sup>16,18,23,24</sup> and the two non-sham controlled trials were also removed.<sup>15,31</sup> The removal of these trials did not largely affect outcome at 1-3 months for facet joint sham trials (4 trials, MD -0.59, CI -1.10, -0.08) or sacroiliac sham trials (3 trials, MD -0.84, CI -1.37, -0.32) but the facet joint sham trial outcome at 6 months became non-significant (1 trial, MD 0.18, CI -2.80, 3.16).

## **Discussion**

### *Main findings*

This systematic review presents evidence suggesting that RD of the lumbosacral spine is likely to have a small positive effect in patients with chronic back pain. The quality of evidence for the majority of findings is low or very low quality and there is still a degree of uncertainty around this assertion, particularly around the duration of effect. The size of benefit appears to be small (<1 point on a 0-10 pain scale) and there is limited evidence investigating effectiveness at more than 6 months. These

1  
2  
3 assertions apply to RD for facet and sacroiliac joints, whereas evidence for benefit to  
4 other targets is more limited. There is a suggestion that there may be a benefit of RD  
5 for intervertebral discs but there is some inconsistency, with short-term outcomes  
6 showing insignificant effect.  
7  
8  
9  
10

11  
12 What is also clear from the review is that both treatment and sham/no treatment  
13 groups improved during the trials e.g. in the facet joint trials shown in figure 2. In the  
14 sham controlled studies, this may, in part, be due to placebo effect. However, the  
15 large trial by Juch et al<sup>15</sup> used a “no additional treatment” control (both groups  
16 received an exercise program) but all study arms improved over time. This may be  
17 because a high proportion of control study participants actually received RD (~30%)  
18 due to cross-over during the trial. However, this may also be explained by self-  
19 selection of participants who volunteer for research trials,<sup>34</sup> and hence are likely to  
20 make more of an active effort to manage their back pain. Such participants may be  
21 more likely to engage with, and be diligent in, exercise programs and seek medical  
22 assistance where needed.  
23  
24  
25  
26  
27  
28  
29  
30  
31  
32  
33  
34  
35  
36  
37

38 In the trial by Juch et al., control group improvements may also be explained by the  
39 conservative management that they received. The exercise program employed was  
40 multi-disciplinary and comprised individual sessions over 8-12 hours focused on  
41 quality of movement and behaviour, with access to psychological care. There is  
42 evidence suggesting that patients with chronic back pain can benefit from pain  
43 management programs that are of sufficient quality and duration.<sup>35</sup> Where patients  
44 have not received an adequate trial of conservative therapy, they may benefit from  
45 further exercise programs and other conservative management. It remains unclear  
46 whether patients who are either unable or unwilling to engage with conservative  
47 approaches to pain management would benefit from RD based interventions as a  
48  
49  
50  
51  
52  
53  
54  
55  
56  
57  
58  
59  
60

1  
2  
3 first-line or isolated modality of treatment. Hence, there should be some reservation  
4  
5 when considering the use of RD treatment as a first-line, or isolated modality of pain  
6  
7 management.  
8  
9

10 Regression to the mean may also have played a role in control group improvements  
11  
12 since patients in the trial were recruited with elevated pain, responsive to an  
13  
14 anaesthetic block. Back pain has been shown to have a varied aetiology, with some  
15  
16 patients experiencing fluctuating levels of pain over time, whilst other experience  
17  
18 constant high levels of pain.<sup>36,37</sup> For the majority of trials that reported it, duration of  
19  
20 back pain in participants prior to enrolment was 2-5 years and a proportion of these  
21  
22 were likely to have had high levels of constant pain. Some, however, may have been  
23  
24 experiencing fluctuating or recurrent pain within this period since the actual inclusion  
25  
26 criteria for most trials was pain for >3 or 6 months based on patient recall. If they  
27  
28 were recruited at a point where their pain had flared acutely, there would be a natural  
29  
30 tendency for that painful episode to resolve over time.  
31  
32  
33  
34

### 35 36 *Strengths and limitations* 37 38

39 A major strength of this review is that it collates a larger body of evidence than  
40  
41 previous systematic reviews, with the addition of a number of recent trials and  
42  
43 thorough assessment of the quality of the evidence. The review is able to tentatively  
44  
45 answer the question about the effectiveness of RD for back pain; an assertion that,  
46  
47 to date, has proved to be very difficult due a paucity of evidence in this field.  
48  
49

50  
51 This review utilises evidence from a previous Cochrane review<sup>11</sup> but the inclusion  
52  
53 criteria for our review had a narrower scope (included only sham- or conservative  
54  
55 management-controlled trials of conventional neuro-ablative RD). Since the previous  
56  
57  
58  
59  
60

1  
2  
3 review appears to be of high quality, and we updated it with a thorough search of the  
4 literature to date, there is assurance that all relevant trials were included.  
5  
6  
7

8 A limitation of this review is that it was difficult to truly assess risk of bias in trials  
9 included in the review. Trial integrity rested heavily on the blinding of participants and  
10 the outcome was likely to be highly subject to patients' preconceptions of the  
11 different interventions given. Most trials did not report information that providers gave  
12 patients about the different possible treatment arms e.g. did providers suggest to  
13 patients that RD was the effective treatment and that sham or no treatment would be  
14 ineffective? Where blinding was broken, these viewpoints may have influenced  
15 patients' response. In some of the sham-controlled studies this was clearly evident.  
16 For example, in some studies, before randomisation, patients were told that, if  
17 randomised to sham, they could receive RD if they gained no benefit. Where blinding  
18 was broken, these opinions were likely to influence patients' perception of their pain.  
19 In other studies information from providers was not reported and it is difficult to  
20 assess whether this type of bias occurred.  
21  
22  
23  
24  
25  
26  
27  
28  
29  
30  
31  
32  
33  
34  
35  
36  
37  
38

39 The review may also be limited in its ability to ascertain the technical quality of  
40 individual research trials. Even when examining the reported trial methodology, it is  
41 difficult to conclusively identify trials that employed procedures that may be more or  
42 less successful in denervating the specific lumbosacral anatomy. Some aspects of  
43 RD procedures in earlier trials are considered outdated<sup>38,39</sup> but the advantages of  
44 more recent procedures for RD remain unproven, and there is no clear evidence of  
45 their superiority. Sensitivity analysis based on technical quality was therefore  
46 considered unhelpful and not performed.  
47  
48  
49  
50  
51  
52  
53  
54  
55  
56

57 The review is also limited by the lack of long term data from trials. Most studies do  
58 not attempt to blind patients for more than 3 months and the longer follow up  
59  
60

1  
2  
3 outcomes are considered to be at higher risk of bias. It is still therefore unclear  
4  
5 whether RD of lumbosacral anatomy has long-term benefits for back pain.  
6  
7

8 Finally, the review is limited in its ability to identify any aspects of patient or  
9  
10 intervention characteristics that may make RD treatment more likely to be beneficial.  
11

12  
13 There is to date no reliable predictor of benefit on back pain for RD procedures  
14  
15 based on clinical or imaging findings or diagnostic injections.<sup>40</sup> The relative  
16  
17 advantages of different RD technologies used in included trials (e.g. 'cooled'<sup>24,25,31</sup>  
18  
19 and 'bipolar'<sup>29,31</sup> RD) remains to be established. Due to the small number of studies  
20  
21 at each time point, sub-group analysis was not considered appropriate. However, the  
22  
23 publication of more sham-controlled trials and trials comparing different RD  
24  
25 technologies may make this type of investigation possible. Technical advances and  
26  
27 advances in knowledge and experience may allow RD to become a more effective  
28  
29 treatment and it is important that these developments are formally assessed and  
30  
31 published.  
32  
33  
34

35  
36 In conclusion, despite the limitations in this review and the published literature, it is  
37  
38 possible to conclude that there is likely to be a beneficial effect of RD of selected  
39  
40 lumbosacral anatomical targets for chronic back pain. However, the mean size of  
41  
42 effect appears to be small and, overall, clinical significance may be marginal. Hence,  
43  
44 chronic back pain remains a highly challenging condition to treat.  
45  
46  
47  
48  
49  
50

51 **Acknowledgements** Thanks to Julie Aikens and Kerry Herbert at Hinchingsbrooke  
52  
53 Healthcare Library for their assistance in designing and running the search strategies  
54  
55 for the review.  
56  
57  
58  
59  
60



1  
2  
3 **Contributors:** MC contributed to the planning of this work, selected articles for  
4 inclusion, extracted data, quality assessed studies and drafted and re-drafted the  
5 manuscript. RL contributed to the planning of this work, reviewed the manuscript and  
6 approved the final version. PT extracted data from the trials, reviewed the  
7 manuscript and approved the final version. MA contributed to the planning of this  
8 work, reviewed the manuscript and approved the final version. ML contributed to the  
9 planning of this work, reviewed the manuscript and approved the final version.

10  
11  
12  
13  
14  
15  
16  
17  
18  
19  
20 **Funding** This research received no specific grant from any funding agency in the  
21 public, commercial or not-for-profit sectors. RL is supported by the Medical Research  
22 Council (MC\_UU\_12015/2). MCL is supported by AABGI Foundation project grant  
23 (RCZB/071).

24  
25  
26  
27  
28  
29 **Competing interests** None declared.

30  
31  
32 **Patient consent for publication** Not required.

33  
34  
35 **Provenance and peer review** Not commissioned; externally peer reviewed.

36  
37  
38 **Data availability statement** All data relevant to the study are included in the article  
39 or uploaded as supplementary information.

40  
41  
42  
43 **Patient and Public Involvement** This research was done without patient  
44 involvement.

45  
46  
47  
48 **Open access** This is an open access article distributed in accordance with the  
49 Creative Commons Attribution Non Commercial (CC BY-NC 4.0) license, which  
50 permits others to distribute, remix, adapt, build upon this work non-commercially, and  
51 license their derivative works on different terms, provided the original work is  
52 properly cited, appropriate credit is given, any changes made indicated, and the use  
53 is non-commercial. See: <http://creativecommons.org/licenses/by-nc/4.0/>.

## References

- 1 Hartvigsen J, Hancock MJ, Kongsted A, *et al*. What low back pain is and why we need to pay attention. *Lancet* 2018;391:2356–67. doi:10.1016/S0140-6736(18)30480-X
- 2 Hoy D, Bain C, Williams G, *et al*. A systematic review of the global prevalence of low back pain. *Arthritis Rheum* 2012;64:2028–37. doi:10.1002/art.34347
- 3 Maniadakis N, Gray A. The economic burden of back pain in the UK. *Pain* 2000;84:95–103. doi:10.1016/S0304-3959(99)00187-6
- 4 Dagenais S, Caro J, Haldeman S. A systematic review of low back pain cost of illness studies in the United States and internationally. *Spine J* 2008;8:8–20. doi:10.1016/j.spinee.2007.10.005
- 5 National Institute of Health and Care Excellence. Low back pain and sciatica in over 16s: assessment and management. 2016.
- 6 Chou R, Baisden J, Carragee EJ, *et al*. Surgery for Low Back Pain: A Review of the Evidence for an American Pain Society Clinical Practice Guideline. *Spine (Phila Pa 1976)* 2009;34:1094–109.
- 7 Chou R, Loeser JD, Owens DK, *et al*. Interventional Therapies, Surgery, and Interdisciplinary Rehabilitation for Low Back Pain: An Evidence-Based Clinical Practice Guideline From the American Pain Society. *Spine (Phila Pa 1976)* 2009;34:1066–77. doi:10.1097/BRS.0b013e3181a1390d
- 8 Kline M. Radiofrequency techniques in clinical practice. In: *Waldman SD, Winnie AP, eds. Interventional Pain Management. Philadelphia, PA: Saunders. 1996.*

- 1  
2  
3 9 Wray JK, Dixon B, Przkora R. *Radiofrequency Ablation*. 2019.  
4  
5  
6 10 Manchikanti L, Hirsch J, Pampati V, *et al*. Utilization of Facet Joint and  
7  
8 Sacroiliac Joint Interventions in Medicare Population from 2000 to 2014:  
9  
10 Explosive Growth Continues! *Curr Pain Headache Rep* 2016;20:58.  
11  
12  
13 11 Maas E, Ostelo R, Niemisto L, *et al*. Radiofrequency denervation for chronic  
14  
15 low back pain. *Cochrane Database Syst Rev* 2015;:Art. No.: CD008572.  
16  
17 doi:10.1001/jama.2017.16386  
18  
19  
20  
21 12 Brandon R, Cohen D, Edward T, *et al*. Pulsed Radiofrequency  
22  
23 Neuromodulation in Interventional Pain Management—A Growing Technology.  
24  
25 *J Radiol Nurs* 2018;37:181–7.  
26  
27  
28 13 Schünemann H, Brożek J, Guyatt G, *et al.*, editors. *GRADE Handbook:*  
29  
30 *Handbook for grading the quality of evidence and the strength of*  
31  
32 *recommendations using the GRADE approach*.  
33  
34  
35 14 Higgins JP, Savovic J, Page MJ, *et al.*, editors. *Revised Cochrane risk-of-bias*  
36  
37 *tool for randomized trials (RoB 2)*. 2019.  
38  
39  
40  
41 15 Juch JNS, Maas ET, Ostelo RWJG, *et al*. Effect of Radiofrequency  
42  
43 Denervation on Pain Intensity Among Patients With Chronic Low Back Pain.  
44  
45 *JAMA* 2017;318:68–81.  
46  
47  
48 16 Gallagher J, Petriccione di Vadi P, Wedley J, *et al*. Radiofrequency facet joint  
49  
50 denervation in the treatment of low back pain: a prospective controlled double-  
51  
52 blind study to assess its efficacy. *Pain Clin* 1994;7:193–8.  
53  
54  
55 17 Leclaire R, Fortin L, Lambert R, *et al*. Radiofrequency Facet Joint Denervation  
56  
57 in the Treatment of Low Back Pain: A Placebo-Controlled Clinical Trial to  
58  
59 Assess Efficacy. *Spine (Phila Pa 1976)* 2001;26:1411–6.  
60

- 1  
2  
3 doi:10.1097/00007632-200107010-00003  
4  
5  
6 18 Moussa WMM, Khedr W. Percutaneous radiofrequency facet capsule  
7  
8 denervation as an alternative target in lumbar facet syndrome. *Clin Neurol*  
9  
10 *Neurosurg* 2016;150:96–104. doi:10.1016/j.clineuro.2016.09.004  
11  
12  
13 19 van Kleef M, Barendse GAM, Kessels A, *et al.* Randomised trial of  
14  
15 radiofrequency lumbar facet denervation for chronic low back pain. *Spine*  
16  
17 *(Phila Pa 1976)* 1999;24:1937–42.  
18  
19  
20 20 Van Tilburg CWJ, Schuurmans FA, Stronks DL, *et al.* Randomized sham-  
21  
22 controlled double-blind multicenter clinical trial to ascertain the effect of  
23  
24 percutaneous radiofrequency treatment for sacroiliac joint pain: Three-month  
25  
26 results. *Clin J Pain* 2016;32:921–6. doi:10.1097/AJP.0000000000000351  
27  
28  
29  
30 21 Van Wijk RMAW, Geurts JWM, Wynne HJ, *et al.* Radiofrequency denervation  
31  
32 of lumbar facet joints in the treatment of chronic low back pain: A randomized,  
33  
34 double-blind, sham lesion-controlled trial. *Clin J Pain* 2005;21:335–44.  
35  
36  
37  
38 22 Nath S, Nath CA, Pettersson K. Percutaneous Lumbar Zygapophysial (Facet)  
39  
40 Joint Neurotomy Using Radiofrequency Current, in the Management of  
41  
42 Chronic Low Back Pain. *Spine (Phila Pa 1976)* 2008;33:1291–1297.  
43  
44 doi:10.1109/ICCGI.2010.42  
45  
46  
47 23 Tekin I, Mirzai H, Ok G, *et al.* A comparison of conventional and pulsed  
48  
49 radiofrequency denervation in the treatment of chronic facet joint pain. *Clin J*  
50  
51 *Pain* 2007;23:524–9. doi:10.1097/AJP.0b013e318074c99c  
52  
53  
54  
55 24 Cohen SP, Hurley RW, Buckenmaier CC, *et al.* Randomized Placebo-  
56  
57 Controlled Study Evaluating Lateral Branch Radiofrequency Denervation for  
58  
59 Sacroiliac Joint Pain. *Anesthesiology* 2008;109:279–88.  
60

- 1  
2  
3 doi:10.1038/mp.2011.182.doi  
4  
5  
6 25 Patel N, Gross A, Brown L, *et al.* A Randomized, Placebo-Controlled Study to  
7 Assess the Efficacy of Lateral Branch Neurotomy for Chronic Sacroiliac Joint  
8 Pain. *Pain Med* 2012;13:383–98. doi:10.1111/j.1526-4637.2012.01328.x  
9  
10  
11  
12  
13 26 Van Tilburg C, Stronks D, Groeneweg J, *et al.* Randomised sham-controlled  
14 double-blind multicentre clinical trial to ascertain the effect of percutaneous  
15 radiofrequency treatment for lumbar facet joint pain. *Spine (Phila Pa 1976)*  
16 2016;98-B:1526–33.  
17  
18  
19  
20  
21  
22  
23 27 Mehta V, Poply K, Husband M, *et al.* The Effects of Radiofrequency  
24 Neurotomy Using a Strip-Lesioning Device on Patients with Sacroiliac Joint  
25 Pain: Results from a Single-Center, Randomized, Sham-Controlled Trial. *Pain*  
26 *Physician* 2018;21:607–18.  
27  
28  
29  
30  
31  
32  
33 28 Barendse GAM, van den Berg SGM, Kessels AHF, *et al.* Randomized  
34 Controlled Trial of Percutaneous Intradiscal Radiofrequency  
35 Thermocoagulation for Chronic Discogenic Back Pain. Lack of Effect From a  
36 90-Second 70 C Lesion. *Spine (Phila Pa 1976)* 2001;26:287–92.  
37  
38  
39  
40  
41  
42 doi:10.1097/00007632-200102010-00014  
43  
44  
45 29 Kapural L, Vrooman B, Sarwar S, *et al.* A Randomized, Placebo-Controlled  
46 Trial of Transdiscal Radiofrequency, Biacuplasty for Treatment of Discogenic  
47 Lower Back Pain. *Pain Med* 2013;14:362–73. doi:10.1111/pme.12023  
48  
49  
50  
51  
52 30 van Tilburg CWJ, Stronks DL, Groeneweg JG, *et al.* Randomized sham-  
53 controlled, double-blind, multicenter clinical trial on the effect of percutaneous  
54 radiofrequency at the ramus communicans for lumbar disc pain. *Eur J Pain*  
55 2017;21:520–9. doi:10.1002/ejp.945  
56  
57  
58  
59  
60

- 1  
2  
3 31 Desai MJ, Kapural L, Petersohn JD, *et al.* A prospective, randomized,  
4 multicenter, open-label clinical trial comparing intradiscal biacuplasty to  
5 conventional medical management for discogenic lumbar back pain. *Spine*  
6 *(Phila Pa 1976)* 2016;41:1065–74. doi:10.1097/BRS.0000000000001412  
7  
8  
9  
10  
11  
12 32 Kvarstein G, Måwe L, Indahl A, *et al.* A randomized double-blind controlled trial  
13 of intra-annular radiofrequency thermal disc therapy - A 12-month follow-up.  
14 *Pain* 2009;145:279–86. doi:10.1016/j.pain.2009.05.001  
15  
16  
17  
18  
19 33 Fischgrund JS, Rhyne A, Franke J, *et al.* Intraosseous basivertebral nerve  
20 ablation for the treatment of chronic low back pain: a prospective randomized  
21 double-blind sham-controlled multi-center study. *Eur Spine J* 2018;27:1146–  
22 56. doi:10.1007/s00586-018-5496-1  
23  
24  
25  
26  
27  
28  
29 34 The Cochrane Collaboration. Introduction to sources of bias in clinical trials. In:  
30 *Cochrane Handbook for Systematic Reviews of Interventions*. 2011.  
31  
32  
33  
34 35 Morley S, Williams A, Hussain S. Estimating the clinical effectiveness of  
35 cognitive behavioural therapy in the clinic: Evaluation of a CBT informed pain  
36 management programme. *Pain* 2008;137:670–80.  
37  
38  
39  
40  
41  
42 36 Dunn K, Croft P. Epidemiology and natural history of low back pain. *Eura*  
43 *Medicophys* 2004;40:9–13.  
44  
45  
46  
47 37 Dunn K, Jordan K, Croft P. Characterizing the course of low back pain: a latent  
48 class analysis. *Am J Epidemiol* 2006;63:754–61.  
49  
50  
51  
52 38 Dreyfuss P, Baker R. Comment on: Radiofrequency facet joint denervation in  
53 the treatment of low back pain: a placebo-controlled clinical trial to assess  
54 efficacy. *Spine (Phila Pa 1976)* 2002;27:556–7.  
55  
56  
57  
58  
59 39 Kapural L, Provenzano D, Narouze S. RE: Juch JNS, *et al.* Effect of

1  
2  
3 Radiofrequency Denervation on Pain Intensity Among Patients With Chronic  
4  
5 Low Back Pain: The Mint Randomized Clinical Trials. *JAMA* 2017;318(1):68–  
6  
7 81. *Neuromodulation* 2017;20:844. doi:10.1111/ner.12729  
8  
9

- 10 40 Cohen SP, Julie JH, Brummett C. Facet joint pain-advances in patient  
11  
12 selection and treatment. *Nat Rev Rheumatol* 2013;9:101–16.  
13  
14  
15 doi:10.1038/nrrheum.2012.198  
16  
17  
18  
19  
20  
21  
22  
23  
24  
25  
26  
27  
28  
29  
30  
31  
32  
33  
34  
35  
36  
37  
38  
39  
40  
41  
42  
43  
44  
45  
46  
47  
48  
49  
50  
51  
52  
53  
54  
55  
56  
57  
58  
59  
60

For peer review only

**Table 1** Results of the meta-analyses of randomised controlled trials

|                                              | All trials |     |                         |                |          | Sham controlled trials |     |                         |                |                       |
|----------------------------------------------|------------|-----|-------------------------|----------------|----------|------------------------|-----|-------------------------|----------------|-----------------------|
|                                              | k          | N   | MD (95% CI)             | I <sup>2</sup> | GRADE*   | k                      | N   | MD (95% CI)             | I <sup>2</sup> | GRADE*                |
| <b>RD of the facet joints</b>                |            |     |                         |                |          |                        |     |                         |                |                       |
| <b>1-3 months</b>                            | 7          | 599 | -0.48<br>(-0.81, -0.15) | 59%            | Low      | 6                      | 348 | -0.51<br>(-0.90, -0.11) | 66%            | Low                   |
| <b>1 month</b>                               | 4          | 411 | -0.64<br>(-1.08, -0.21) | 22%            | Moderate | 3                      | 160 | -0.48<br>(-1.17, 0.21)  | 43%            | Low                   |
| <b>2 months</b>                              | 2          | 282 | -0.83<br>(-1.36, -0.30) | 44%            | Low      | 1                      | 31  | -1.94<br>(-3.65, -0.23) | NA             | Very low              |
| <b>3 months</b>                              | 4          | 478 | -0.41<br>(-0.76, -0.03) | 64%            | Low      | 3                      | 127 | -0.37<br>(-0.83, 0.08)  | 76%            | Very low<br>(R, H, I) |
| <b>6 months</b>                              | 4          | 361 | -0.57<br>(-1.01, -0.13) | 42%            | Low      | 3                      | 110 | -0.90<br>(-1.53, -0.28) | 32%            | Low<br>(R, I)         |
| <b>1 year</b>                                | 2          | 291 | -0.71<br>(-1.20, -0.21) | 89%            | Very low | 1                      | 40  | -1.50<br>(-2.21, -0.79) | NA             | Very low              |
| <b>RD of the sacroiliac joints</b>           |            |     |                         |                |          |                        |     |                         |                |                       |
| <b>1-3 months</b>                            | 5          | 384 | -0.97<br>(-1.38, -0.57) | 83%            | Low      | 4                      | 156 | -1.13<br>(-1.63, -0.63) | 87%            | Very low              |
| <b>1 month</b>                               | 4          | 367 | -0.91<br>(-1.32, -0.51) | 82%            | Low      | 3                      | 139 | -0.81<br>(-1.36, -0.26) | 88%            | Very low              |
| <b>2 months</b>                              | 1          | 228 | -0.47<br>(-1.04, 0.10)  | NA             | Low      |                        |     |                         |                |                       |
| <b>3 months</b>                              | 4          | 356 | -0.78<br>(-1.20, -0.37) | 73%            | Low      | 3                      | 128 | -0.84<br>(-1.37, -0.32) | 81%            | Very low              |
| <b>6 months</b>                              | 1          | 228 | -0.28<br>(-1.00, 0.44)  | NA             | Low      |                        |     |                         |                |                       |
| <b>12 months</b>                             | 1          | 228 | -0.19<br>(-0.92, 0.54)  | NA             | Low      |                        |     |                         |                |                       |
| <b>RD of the intervertebral discs</b>        |            |     |                         |                |          |                        |     |                         |                |                       |
| <b>1-3 months</b>                            | 4          | 200 | -0.98<br>(-1.62, -0.33) | 40%            | Low      | 3                      | 144 | -0.63<br>(-1.36, 0.10)  | 0%             | Low                   |
| <b>1 month</b>                               | 3          | 176 | -0.61<br>(-1.31, 0.09)  | 61%            | Low      | 2                      | 116 | -0.16<br>(-0.97, 0.65)  | 0%             | Low<br>(R,I)          |
| <b>2 months</b>                              | 1          | 28  | 0.28<br>(-1.95, 2.51)   | NA             | Very low | 1                      | 28  | 0.28<br>(-1.95, 2.51)   | NA             | Very low              |
| <b>3 months</b>                              | 3          | 172 | -1.09<br>(-1.76, -0.42) | 45%            | Low      | 2                      | 116 | -0.74<br>(-1.51, 0.03)  | 0%             | Low                   |
| <b>6 months</b>                              | 3          | 127 | -1.74<br>(-2.58, -0.91) | 0%             | Low      | 2                      | 75  | -1.63<br>(-2.58, -0.68) | 0%             | Low                   |
| <b>12 months</b>                             | 1          | 20  | -1.70<br>(-3.63, 0.23)  | NA             | Very low | 1                      | 20  | -1.70<br>(-3.63, 0.23)  | NA             | Very low              |
| <b>RD of the vertebrae body and endplate</b> |            |     |                         |                |          |                        |     |                         |                |                       |
| <b>3 months</b>                              | 1          | 205 | -0.34<br>(-1.09, 0.41)  | NA             | Moderate | 1                      | 205 | -0.34<br>(-1.09, 0.41)  | NA             | Moderate              |
| <b>6 months</b>                              | 1          | 205 | -0.67<br>(-1.44, 0.10)  | NA             | Moderate | 1                      | 205 | -0.67<br>(-1.44, 0.10)  | NA             | Moderate              |
| <b>12 months</b>                             | 1          | 205 | -0.50<br>(-1.29, 0.29)  | NA             | Moderate | 1                      | 205 | -0.50<br>(-1.29, 0.29)  | NA             | Moderate              |

k, number of trials; N, number of participants; MD, Mean difference.

\*GRADE assessment of the quality of the evidence



1  
2  
3  
4  
5  
6  
7  
8  
9  
10  
11  
12  
13  
14  
15  
16  
17  
18  
19  
20  
21  
22  
23  
24  
25  
26  
27  
28  
29  
30  
31  
32  
33  
34  
35  
36  
37  
38  
39  
40  
41  
42  
43  
44  
45  
46  
47  
48  
49  
50  
51  
52  
53  
54  
55  
56  
57  
58  
59  
60

Figure 1 PRISMA flow diagram

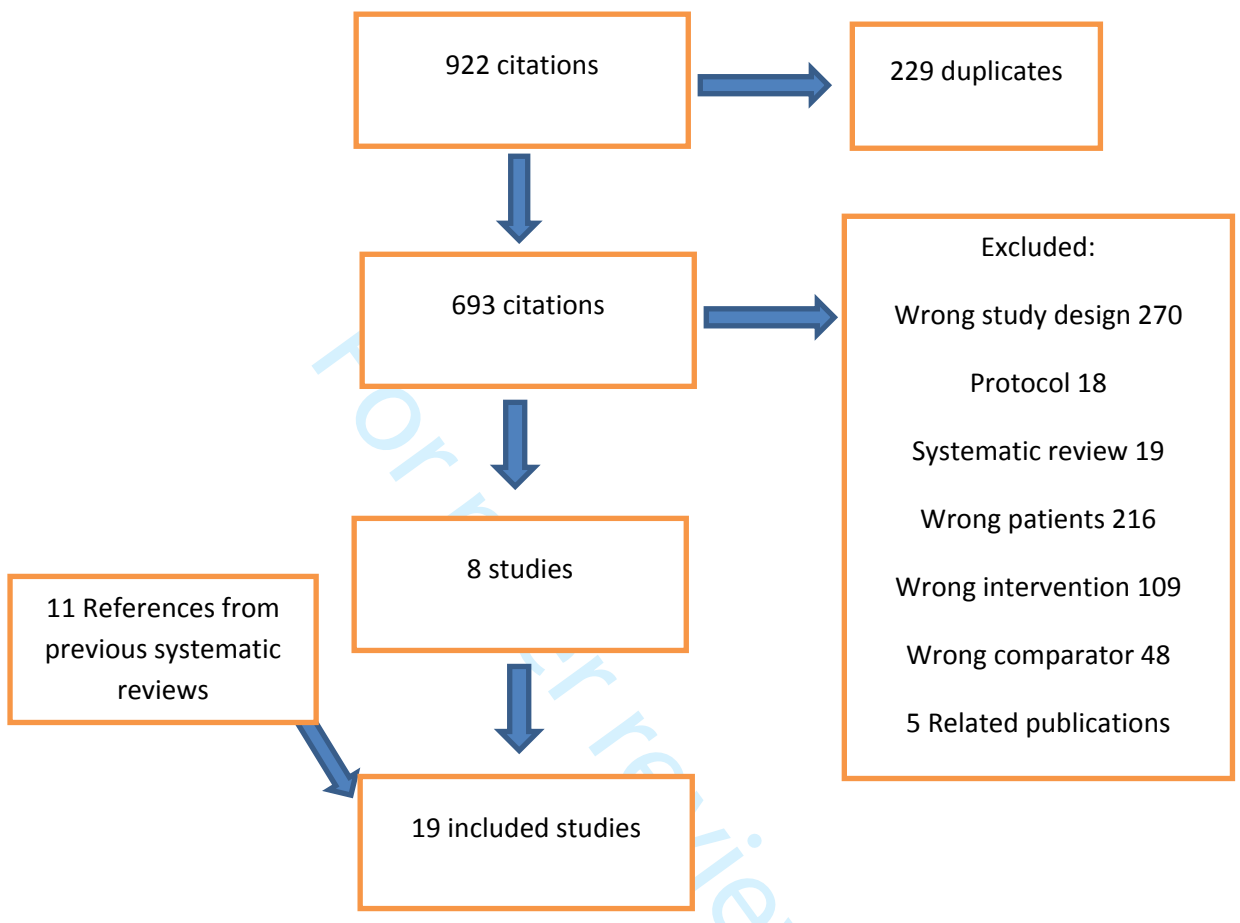

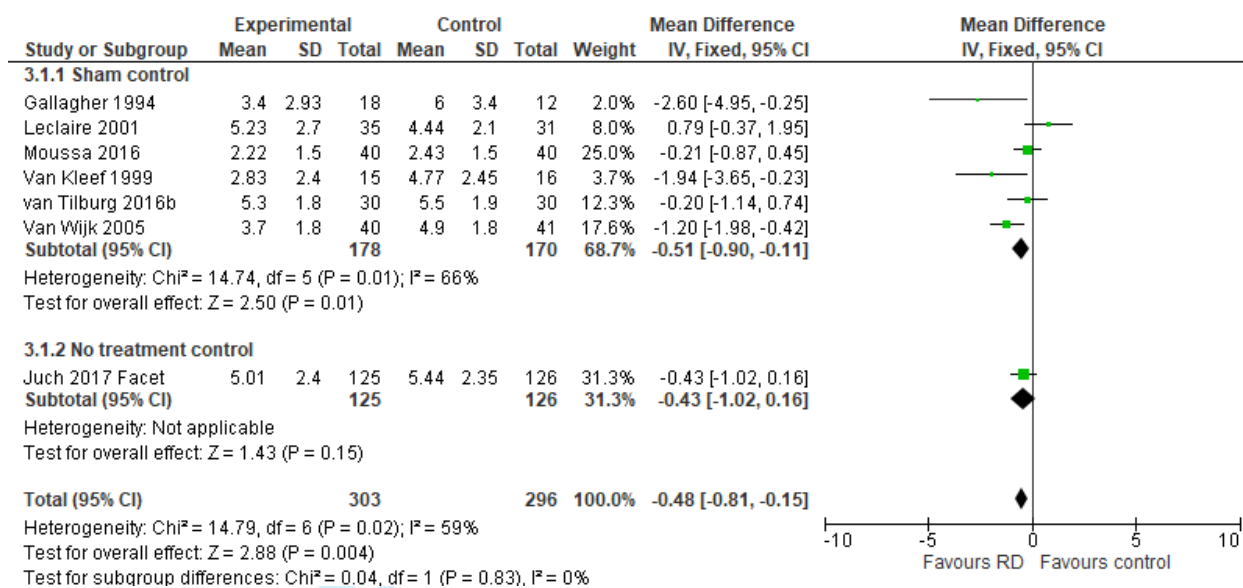

**Figure 2** Post treatment pain score for radiofrequency denervation of the facet joints versus control at 1-3 month follow-up (longest time point used for studies with multiple time points)

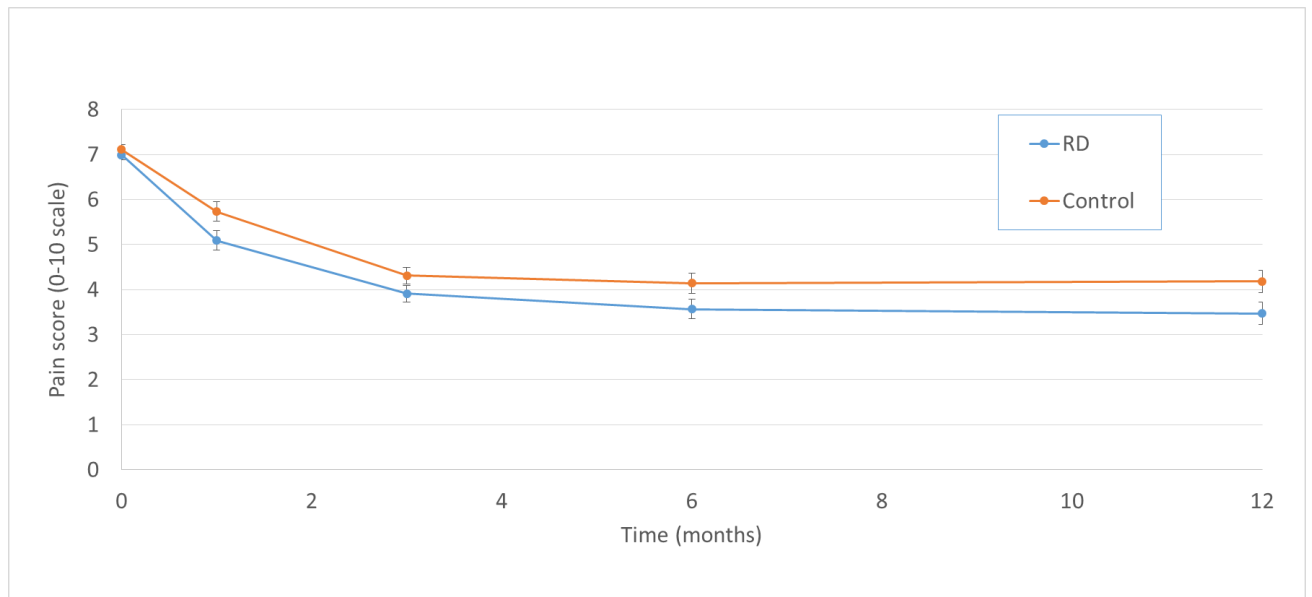

**Figure 3** Change in back pain score (closed bound 0-10 scale) for patients with facet joint pain following radiofrequency denervation or control treatment

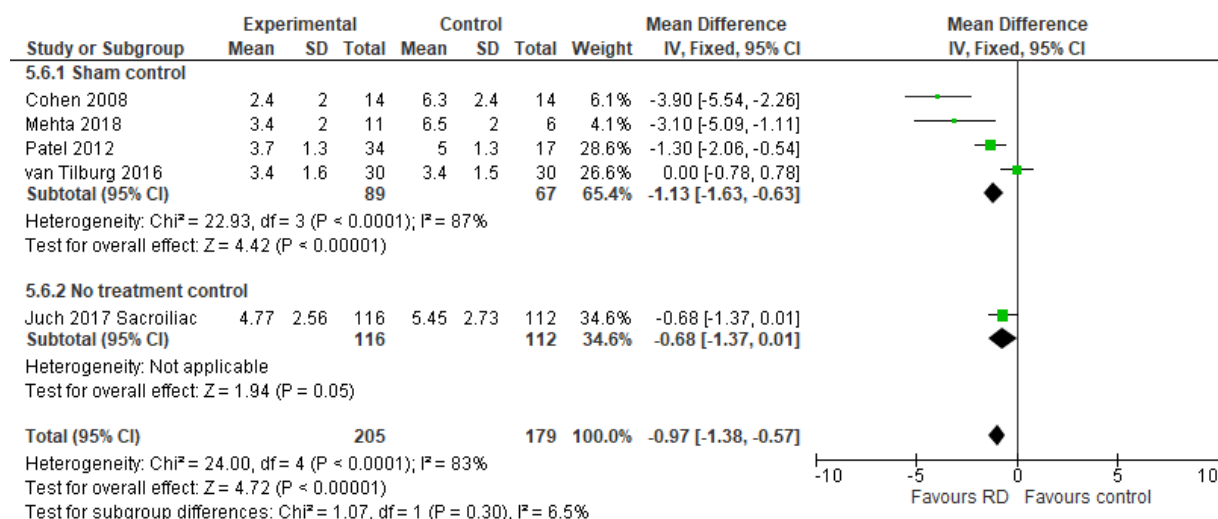

**Figure 4** Post treatment pain score for radiofrequency denervation of the sacroiliac joints versus control at 1-3 month follow-up (longest time point used for studies with multiple time points)

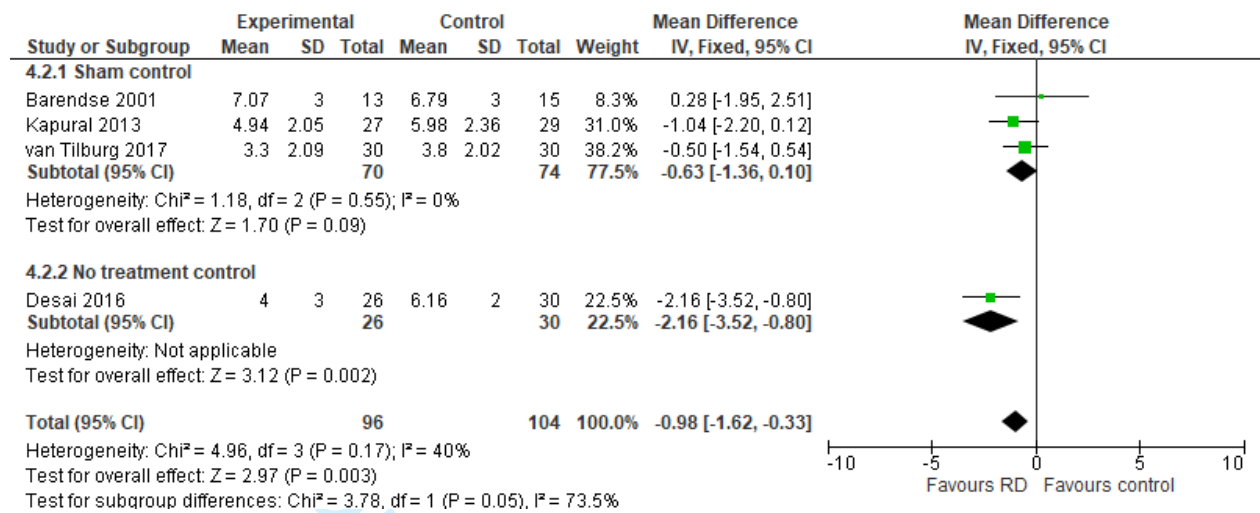

**Figure 5** Post treatment pain score for radiofrequency denervation of the intervertebral discs versus control at 1-3 month follow-up (longest time point used for studies with multiple time points)

## Appendix 1 Search strategies

### Medline and Embase

| #  | Database | Search term                            |
|----|----------|----------------------------------------|
| 1  | Medline  | (randomized controlled trial).pt       |
| 2  | Medline  | (controlled clinical trial).pt         |
| 3  | Medline  | (randomi*ed).ab                        |
| 4  | Medline  | (placebo).ti,ab                        |
| 5  | Medline  | (drug therapy).fs                      |
| 6  | Medline  | (randomly).ti,ab                       |
| 7  | Medline  | (trial).ti,ab                          |
| 8  | Medline  | (groups).ti,ab                         |
| 9  | Medline  | (1 OR 2 OR 3 OR 4 OR 5 OR 6 OR 7 OR 8) |
| 10 | Medline  | (animals NOT (humans AND animals)).su  |
| 11 | Medline  | 9 not 10                               |
| 12 | Medline  | (dorsalgia).ti,ab                      |
| 13 | Medline  | exp "BACK PAIN"/                       |
| 14 | Medline  | (backache).ti,ab                       |
| 15 | Medline  | (lumbar ADJ pain).ti,ab                |
| 16 | Medline  | (coccyx).ti,ab                         |
| 17 | Medline  | (coccydynia).ti,ab                     |
| 18 | Medline  | (sciatica).ti,ab                       |
| 19 | Medline  | "SCIATIC NEUROPATHY"/                  |

|    |    |         |                                                     |
|----|----|---------|-----------------------------------------------------|
| 1  |    |         |                                                     |
| 2  |    |         |                                                     |
| 3  | 20 | Medline | (spondylosis).ti,ab                                 |
| 4  |    |         |                                                     |
| 5  | 21 | Medline | (lumbago).ti,ab                                     |
| 6  |    |         |                                                     |
| 7  |    |         |                                                     |
| 8  | 22 | Medline | (12 OR 13 OR 14 OR 15 OR 16 OR 17 OR 18 OR 19 OR 20 |
| 9  |    |         | OR 21)                                              |
| 10 |    |         |                                                     |
| 11 | 23 | Medline | exp SPINE/                                          |
| 12 |    |         |                                                     |
| 13 |    |         |                                                     |
| 14 | 24 | Medline | (discitis).ti,ab                                    |
| 15 |    |         |                                                     |
| 16 |    |         |                                                     |
| 17 | 25 | Medline | exp "SPINAL DISEASES"/                              |
| 18 |    |         |                                                     |
| 19 | 26 | Medline | (disc ADJ degeneration).ti,ab                       |
| 20 |    |         |                                                     |
| 21 |    |         |                                                     |
| 22 | 27 | Medline | (disc ADJ prolapse).ti,ab                           |
| 23 |    |         |                                                     |
| 24 |    |         |                                                     |
| 25 | 28 | Medline | (disc ADJ herniation).ti,ab                         |
| 26 |    |         |                                                     |
| 27 |    |         |                                                     |
| 28 | 29 | Medline | (spinal fusion).su                                  |
| 29 |    |         |                                                     |
| 30 | 30 | Medline | (facet ADJ joints).ti,ab                            |
| 31 |    |         |                                                     |
| 32 |    |         |                                                     |
| 33 | 31 | Medline | (intervertebral disc).su                            |
| 34 |    |         |                                                     |
| 35 | 32 | Medline | (postlaminectomy).ti,ab                             |
| 36 |    |         |                                                     |
| 37 |    |         |                                                     |
| 38 | 33 | Medline | (arachnoiditis).ti,ab                               |
| 39 |    |         |                                                     |
| 40 |    |         |                                                     |
| 41 | 34 | Medline | (failed ADJ back).ti,ab                             |
| 42 |    |         |                                                     |
| 43 | 35 | Medline | (23 OR 24 OR 25 OR 26 OR 27 OR 28 OR 29 OR 30 OR 31 |
| 44 |    |         | OR 32 OR 33 OR 34)                                  |
| 45 |    |         |                                                     |
| 46 | 36 | Medline | (22 OR 35)                                          |
| 47 |    |         |                                                     |
| 48 |    |         |                                                     |
| 49 | 37 | Medline | exp "RADIO WAVES"/                                  |
| 50 |    |         |                                                     |
| 51 |    |         |                                                     |
| 52 | 38 | Medline | exp "PULSED RADIOFREQUENCY TREATMENT"/              |
| 53 |    |         |                                                     |
| 54 | 39 | Medline | (radiofrequency).af                                 |
| 55 |    |         |                                                     |
| 56 |    |         |                                                     |
| 57 | 40 | Medline | (radio frequency).af                                |
| 58 |    |         |                                                     |
| 59 |    |         |                                                     |
| 60 |    |         |                                                     |

- 1  
2  
3 41 Medline exp ELECTROCOAGULATION/  
4  
5  
6 42 Medline (electrocoag\*).af  
7  
8 43 Medline (thermocoag\*).af  
9  
10  
11 44 Medline neurotom\* OR (neuroly\*).af  
12  
13 45 Medline (37 OR 38 OR 39 OR 40 OR 41 OR 42 OR 43 OR 44)  
14  
15  
16 46 Medline (11 AND 36 AND 45)  
17  
18 47 EMBASE "CLINICAL TRIAL"/  
19  
20  
21 48 EMBASE "CONTROLLED CLINICAL TRIAL"/  
22  
23  
24 49 EMBASE "CONTROLLED STUDY"/  
25  
26  
27 50 EMBASE "RANDOMIZED CONTROLLED TRIAL"/  
28  
29  
30 51 EMBASE "DOUBLE BLIND PROCEDURE"/  
31  
32  
33 52 EMBASE "SINGLE BLIND PROCEDURE"/  
34  
35  
36 53 EMBASE "CROSSOVER PROCEDURE"/  
37  
38  
39 54 EMBASE PLACEBO/  
40  
41 55 EMBASE (allocat\*).ti,ab  
42  
43 56 EMBASE (assign\*).ti,ab  
44  
45 57 EMBASE (blind\*).ti,ab  
46  
47 58 EMBASE (clinic\* ADJ25 (study OR trial)).ti,ab  
48  
49  
50 59 EMBASE (crossover OR cross-over).ti,ab  
51  
52  
53 60 EMBASE (factorial\*).ti,ab  
54  
55  
56 61 EMBASE (followup OR follow-up).ti,ab  
57  
58 62 EMBASE (prospectiv\*).ti,ab  
59  
60



1  
2  
3  
4  
5  
6  
7  
8  
9  
10  
11  
12  
13  
14  
15  
16  
17  
18  
19  
20  
21  
22  
23  
24  
25  
26  
27  
28  
29  
30  
31  
32  
33  
34  
35  
36  
37  
38  
39  
40  
41  
42  
43  
44  
45  
46  
47  
48  
49  
50  
51  
52  
53  
54  
55  
56  
57  
58  
59  
60

- 63 EMBASE (placebo\*).ti,ab
- 64 EMBASE (random\*).ti,ab
- 65 EMBASE ((singl\* OR doubl\* OR trebl\* OR trip\*) ADJ25 (blind\* OR mask\*)).ti,ab
- 66 EMBASE (volunteer\*).ti,ab
- 67 EMBASE (47 OR 48 OR 49 OR 50 OR 51 OR 52 OR 53 OR 54 OR 55 OR 56 OR 57 OR 58 OR 59 OR 60 OR 61 OR 62 OR 63 OR 64 OR 65 OR 66)
- 68 EMBASE exp animals/ or exp invertebrate/ or animal experiment/ or animal model/ or animal tissue/ or animal cell/ or nonhuman/
- 69 EMBASE exp ANIMALS/
- 70 EMBASE exp INVERTEBRATE/
- 71 EMBASE ANIMAL EXPERIMENT/
- 72 EMBASE ANIMAL MODEL/
- 73 EMBASE ANIMAL TISSUE/
- 74 EMBASE ANIMAL CELL/
- 75 EMBASE NONHUMAN/
- 76 EMBASE 71 or 72 or 73 or 74 or 75
- 77 EMBASE exp ANIMALS/
- 78 EMBASE exp INVERTEBRATE/
- 79 EMBASE (76 OR 77 OR 78)
- 80 EMBASE 77 or 78
- 81 EMBASE HUMAN/ OR NORMAL HUMAN/ OR HUMAN CELL/
- 82 EMBASE (76 AND 77 AND 78 AND 81)

- 1  
2  
3 83 EMBASE (dorsalgia).ti,ab  
4  
5  
6 84 EMBASE (back pain).ti,ab  
7  
8 85 EMBASE exp BACKACHE/  
9  
10  
11 86 EMBASE (lumbar ADJ pain).ti,ab  
12  
13  
14 87 EMBASE (coccyx).ti,ab  
15  
16 88 EMBASE (coccydynia).ti,ab  
17  
18  
19 89 EMBASE (sciatica).ti,ab  
20  
21 90 EMBASE ISCHIALGIA/  
22  
23  
24 91 EMBASE (spondylosis).ti,ab  
25  
26 92 EMBASE (lumbago).ti,ab  
27  
28  
29 93 EMBASE (back disorder\*).ti,ab  
30  
31  
32 94 EMBASE (83 OR 84 OR 85 OR 86 OR 87 OR 88 OR 89 OR 90 OR 91  
33 OR 92 OR 93)  
34  
35 95 EMBASE exp SPINE/  
36  
37  
38 96 EMBASE (discitis OR diskitis).ti,ab  
39  
40  
41 97 EMBASE exp "SPINE DISEASE"/  
42  
43 98 EMBASE (disc ADJ degeneration).ti,ab  
44  
45  
46 99 EMBASE (disc ADJ prolapse).ti,ab  
47  
48  
49 100 EMBASE (disc ADJ herniation).ti,ab  
50  
51 101 EMBASE (spinal fusion).ti,ab  
52  
53 102 EMBASE (facet ADJ joints).ti,ab  
54  
55  
56 103 EMBASE (intervertebral disk OR Intervertebral disc).ti,ab  
57  
58  
59 104 EMBASE (postlaminectomy).ti,ab  
60

|    |     |                                                            |
|----|-----|------------------------------------------------------------|
| 1  |     |                                                            |
| 2  |     |                                                            |
| 3  | 105 | EMBASE (arachnoiditis).ti,ab                               |
| 4  |     |                                                            |
| 5  | 106 | EMBASE (failed ADJ back).ti,ab                             |
| 6  |     |                                                            |
| 7  |     |                                                            |
| 8  | 107 | EMBASE (95 OR 96 OR 97 OR 98 OR 99 OR 100 OR 101 OR 102 OR |
| 9  |     | 103 OR 104 OR 105 OR 106)                                  |
| 10 |     |                                                            |
| 11 | 108 | EMBASE 94 or 107                                           |
| 12 |     |                                                            |
| 13 |     |                                                            |
| 14 | 109 | EMBASE exp PULSED RADIOFREQUENCY TREATMENT/                |
| 15 |     |                                                            |
| 16 |     |                                                            |
| 17 | 110 | EMBASE exp RADIOFREQUENCY/                                 |
| 18 |     |                                                            |
| 19 | 111 | EMBASE exp RADIOFREQUENCY RADIATION/                       |
| 20 |     |                                                            |
| 21 |     |                                                            |
| 22 | 112 | EMBASE (radiofrequency OR radio-frequency).ti,ab           |
| 23 |     |                                                            |
| 24 |     |                                                            |
| 25 | 113 | EMBASE exp THERMOCOAGULATION/ OR thermocoag*               |
| 26 |     |                                                            |
| 27 | 114 | EMBASE exp ELECTROCOAGULATION/ OR electrocoag*             |
| 28 |     |                                                            |
| 29 |     |                                                            |
| 30 | 115 | EMBASE (neurotom* OR neuroly*).ti,ab                       |
| 31 |     |                                                            |
| 32 | 116 | EMBASE (109 OR 110 OR 111 OR 112 OR 113 OR 114 OR 115)     |
| 33 |     |                                                            |
| 34 |     |                                                            |
| 35 | 117 | EMBASE (108 AND 116)                                       |
| 36 |     |                                                            |
| 37 |     |                                                            |
| 38 | 118 | Medline 46 [DT 2014-2019]                                  |
| 39 |     |                                                            |
| 40 |     |                                                            |
| 41 |     |                                                            |

### Medline in process

| # | Database | Search term                           |
|---|----------|---------------------------------------|
| 1 | Medline  | ("randomi*ed controlled trial").ti,ab |
| 2 | Medline  | ("controlled clinical trial").ti,ab   |
| 3 | Medline  | ("randomi*ed").ab                     |
| 4 | Medline  | (placebo).ti,ab                       |
| 5 | Medline  | ("drug therapy").fs                   |

- 1  
2  
3 6 Medline (randomly).ti,ab  
4  
5  
6 7 Medline (trial).ti,ab  
7  
8 8 Medline (groups).ti,ab  
9  
10  
11 9 Medline (1 OR 2 OR 3 OR 4 OR 5 OR 6 OR 7 OR 8)  
12  
13 10 Medline (dorsalgia).ti,ab  
14  
15  
16 11 Medline ("back pain").ti,ab  
17  
18  
19 12 Medline (backache).ti,ab  
20  
21 13 Medline ("lumber pain").ti,ab  
22  
23  
24 14 Medline (coccyx).ti,ab  
25  
26 15 Medline (coccydynia).ti,ab  
27  
28  
29 16 Medline (sciatica\*).ti,ab  
30  
31  
32 17 Medline (spondylosis).ti,ab  
33  
34 18 Medline (lumbago).ti,ab  
35  
36  
37 19 Medline (10 OR 11 OR 12 OR 13 OR 14 OR 15 OR 16 OR 17  
38 OR 18)  
39  
40 20 Medline (spine OR sacrum OR "lumber vertebrae" OR  
41 "intervertebral disc\*").ti,ab  
42  
43  
44 21 Medline (discitis).ti,ab  
45  
46  
47 22 Medline ("disc degeneration").ti,ab  
48  
49 23 Medline ("disc prolapse").ti,ab  
50  
51  
52 24 Medline ("disc herniation").ti,ab  
53  
54 25 Medline ("spinal fusion").ti,ab  
55  
56  
57 26 Medline ("facet joints").ti,ab  
58  
59  
60

|    |    |                                                                                                 |
|----|----|-------------------------------------------------------------------------------------------------|
| 1  |    |                                                                                                 |
| 2  |    |                                                                                                 |
| 3  | 27 | Medline (postlaminectomy).ti,ab                                                                 |
| 4  |    |                                                                                                 |
| 5  | 28 | Medline (arachnoiditis).ti,ab                                                                   |
| 6  |    |                                                                                                 |
| 7  |    |                                                                                                 |
| 8  | 29 | Medline ("failed back").ti,ab                                                                   |
| 9  |    |                                                                                                 |
| 10 |    |                                                                                                 |
| 11 | 30 | Medline (20 OR 21 OR 22 OR 23 OR 24 OR 25 OR 26 OR 27<br>OR 28 OR 29)                           |
| 12 |    |                                                                                                 |
| 13 |    |                                                                                                 |
| 14 | 31 | Medline (19 OR 30)                                                                              |
| 15 |    |                                                                                                 |
| 16 |    |                                                                                                 |
| 17 | 32 | Medline (radiowave* OR "radio wave*").ti,ab                                                     |
| 18 |    |                                                                                                 |
| 19 |    |                                                                                                 |
| 20 | 33 | Medline (radiofrequency OR "radio frequency").ti,ab                                             |
| 21 |    |                                                                                                 |
| 22 | 34 | Medline (electrocoag*).ti,ab                                                                    |
| 23 |    |                                                                                                 |
| 24 |    |                                                                                                 |
| 25 | 35 | Medline (thermocoag*).ti,ab                                                                     |
| 26 |    |                                                                                                 |
| 27 |    |                                                                                                 |
| 28 | 36 | Medline (neurotom* OR neuroloy*).ti,ab                                                          |
| 29 |    |                                                                                                 |
| 30 | 37 | Medline (32 OR 33 OR 34 OR 35 OR 36)                                                            |
| 31 |    |                                                                                                 |
| 32 |    |                                                                                                 |
| 33 | 38 | Medline (9 AND 31 AND 37)                                                                       |
| 34 |    |                                                                                                 |
| 35 | 39 | Medline 38 [Document status In Data Review OR In Process<br>OR PubMed not MEDLINE OR Publisher] |
| 36 |    |                                                                                                 |
| 37 |    |                                                                                                 |
| 38 |    |                                                                                                 |
| 39 |    |                                                                                                 |

## Cinahl

| #  | Database | Search term                                   |
|----|----------|-----------------------------------------------|
| 41 |          |                                               |
| 42 |          |                                               |
| 43 |          |                                               |
| 44 |          |                                               |
| 45 | 1        | CINAHL exp "CLINICAL TRIALS"/                 |
| 46 |          |                                               |
| 47 |          |                                               |
| 48 | 2        | CINAHL ("randomi*ed controlled trial*").ti,ab |
| 49 |          |                                               |
| 50 |          |                                               |
| 51 | 3        | CINAHL (clinical ADJ3 trial).ti,ab            |
| 52 |          |                                               |
| 53 |          |                                               |
| 54 | 4        | CINAHL (double-blind).ti,ab                   |
| 55 |          |                                               |
| 56 | 5        | CINAHL (single-blind).ti,ab                   |
| 57 |          |                                               |
| 58 |          |                                               |
| 59 | 6        | CINAHL (triple-blind).ti,ab                   |
| 60 |          |                                               |

- 1  
2  
3 7 CINAHL (1 OR 2 OR 3 OR 4 OR 5 OR 6)  
4  
5  
6 8 CINAHL "PLACEBO EFFECT"/  
7  
8 9 CINAHL PLACEBOS/  
9  
10  
11 10 CINAHL (placebo\*).ti,ab  
12  
13 11 CINAHL (random\*).ti,ab  
14  
15  
16 12 CINAHL (8 OR 9 OR 10 OR 11)  
17  
18  
19 13 CINAHL "RANDOM SAMPLE"/  
20  
21 14 CINAHL exp "STUDY DESIGN"/  
22  
23  
24 15 CINAHL (latin square).ti,ab  
25  
26 16 CINAHL exp "COMPARATIVE STUDIES"/  
27  
28  
29 17 CINAHL exp "EVALUATION RESEARCH"/  
30  
31  
32 18 CINAHL exp "PROSPECTIVE STUDIES"/  
33  
34 19 CINAHL (13 OR 14 OR 15 OR 16 OR 17 OR 18)  
35  
36  
37 20 CINAHL (follow-up stud\*).ti,ab  
38  
39 21 CINAHL (followup stud\*).ti,ab  
40  
41  
42 22 CINAHL (control\*).ti,ab  
43  
44  
45 23 CINAHL (prospectiv\*).ti,ab  
46  
47 24 CINAHL (volunteer\*).ti,ab  
48  
49  
50 25 CINAHL (20 OR 21 OR 22 OR 23 OR 24)  
51  
52 26 CINAHL (7 OR 12 OR 19 OR 25)  
53  
54  
55 27 CINAHL ANIMALS/  
56  
57  
58 28 CINAHL 26 not 27  
59  
60

1  
2  
3 29 CINAHL ("dorsalgia").ti,ab  
4  
5  
6 30 CINAHL exp "BACK PAIN"/  
7  
8 31 CINAHL "LOW BACK PAIN"/  
9  
10  
11 32 CINAHL ("backache").ti,ab  
12  
13  
14 33 CINAHL (lumbar ADJ1 pain).ti,ab  
15  
16 34 CINAHL (lumbar ADJ5 pain).ti,ab  
17  
18  
19 35 CINAHL (29 OR 30 OR 31 OR 32 OR 33 OR 34)  
20  
21 36 CINAHL COCCYX/  
22  
23  
24 37 CINAHL SCIATICA/  
25  
26 38 CINAHL (sciatica).ti,ab  
27  
28  
29 39 CINAHL (coccyx).ti,ab  
30  
31  
32 40 CINAHL (coccydynia).ti,ab  
33  
34 41 CINAHL "LUMBAR VERTEBRAE"/  
35  
36  
37 42 CINAHL (lumbar ADJ2 vertebra).ti,ab  
38  
39  
40 43 CINAHL (36 OR 37 OR 38 OR 39 OR 40 OR 41 OR 42)  
41  
42 44 CINAHL "THORACIC VERTEBRAE"/  
43  
44  
45 45 CINAHL exp SPONDYLOLYSIS/  
46  
47 46 CINAHL (lumbago).ti,ab  
48  
49  
50 47 CINAHL (44 OR 45 OR 46)  
51  
52 48 CINAHL (35 OR 43 OR 47)  
53  
54  
55 49 CINAHL (28 AND 48)  
56  
57  
58 50 CINAHL (radiofrequency OR radio-frequency).ti,ab  
59  
60

|    |    |                                         |
|----|----|-----------------------------------------|
| 1  |    |                                         |
| 2  |    |                                         |
| 3  | 51 | CINAHL                                  |
| 4  |    | (thermocoag*).ti,ab                     |
| 5  |    |                                         |
| 6  | 52 | CINAHL                                  |
| 7  |    | exp ELECTROCOAGULATION/ OR electrocoag* |
| 8  |    |                                         |
| 9  | 53 | CINAHL                                  |
| 10 |    | (neurotom* OR neuroly*).ti,ab           |
| 11 |    |                                         |
| 12 | 54 | CINAHL                                  |
| 13 |    | "RADIO WAVES"/                          |
| 14 |    |                                         |
| 15 | 55 | CINAHL                                  |
| 16 |    | (50 OR 51 OR 52 OR 53 OR 54)            |
| 17 |    |                                         |
| 18 | 56 | CINAHL                                  |
| 19 |    | (49 AND 55)                             |
| 20 |    |                                         |
| 21 | 57 | CINAHL                                  |
| 22 |    | 56 [DT 2014-2019]                       |

### Cochrane

| #  | Database | Search term                                                                                 |
|----|----------|---------------------------------------------------------------------------------------------|
| 23 |          |                                                                                             |
| 24 |          |                                                                                             |
| 25 |          |                                                                                             |
| 26 |          |                                                                                             |
| 27 |          |                                                                                             |
| 28 | 1        | Cochrane                                                                                    |
| 29 |          | MeSH descriptor: [Back Pain] explode all trees                                              |
| 30 |          |                                                                                             |
| 31 | 2        | Cochrane                                                                                    |
| 32 |          | dorsalgia                                                                                   |
| 33 |          |                                                                                             |
| 34 | 3        | Cochrane                                                                                    |
| 35 |          | backache                                                                                    |
| 36 |          |                                                                                             |
| 37 | 4        | Cochrane                                                                                    |
| 38 |          | MeSH descriptor: [Low Back Pain] explode all trees                                          |
| 39 |          |                                                                                             |
| 40 | 5        | Cochrane                                                                                    |
| 41 |          | lumbar next pain or coccyx or coccydynia or spondylosis                                     |
| 42 |          |                                                                                             |
| 43 | 6        | Cochrane                                                                                    |
| 44 |          | MeSH descriptor: [Spine] explode all trees                                                  |
| 45 |          |                                                                                             |
| 46 | 7        | Cochrane                                                                                    |
| 47 |          | MeSH descriptor: [Spinal Diseases] explode all trees                                        |
| 48 |          |                                                                                             |
| 49 | 8        | Cochrane                                                                                    |
| 50 |          | lumbago OR discitis OR disc near degeneration OR disc near prolapse OR disc near herniation |
| 51 |          |                                                                                             |
| 52 | 9        | Cochrane                                                                                    |
| 53 |          | spinal fusion                                                                               |
| 54 |          |                                                                                             |
| 55 | 10       | Cochrane                                                                                    |
| 56 |          | facet near joints                                                                           |
| 57 |          |                                                                                             |
| 58 | 11       | Cochrane                                                                                    |
| 59 |          | MeSH descriptor: [Intervertebral Disk] explode all trees                                    |
| 60 |          |                                                                                             |
|    | 12       | Cochrane                                                                                    |
|    |          | postlaminectomy                                                                             |



|    |    |          |                                                                                                                                                                                 |
|----|----|----------|---------------------------------------------------------------------------------------------------------------------------------------------------------------------------------|
| 1  |    |          |                                                                                                                                                                                 |
| 2  |    |          |                                                                                                                                                                                 |
| 3  | 13 | Cochrane | arachnoiditis                                                                                                                                                                   |
| 4  |    |          |                                                                                                                                                                                 |
| 5  | 14 | Cochrane | failed near back                                                                                                                                                                |
| 6  |    |          |                                                                                                                                                                                 |
| 7  |    |          |                                                                                                                                                                                 |
| 8  | 15 | Cochrane | MeSH descriptor: [Cauda Equina] explode all trees                                                                                                                               |
| 9  |    |          |                                                                                                                                                                                 |
| 10 |    |          |                                                                                                                                                                                 |
| 11 | 16 | Cochrane | lumbar near vertebra*                                                                                                                                                           |
| 12 |    |          |                                                                                                                                                                                 |
| 13 | 17 | Cochrane | spinal near stenosis                                                                                                                                                            |
| 14 |    |          |                                                                                                                                                                                 |
| 15 |    |          |                                                                                                                                                                                 |
| 16 | 18 | Cochrane | slipped near (disc* or disk*)                                                                                                                                                   |
| 17 |    |          |                                                                                                                                                                                 |
| 18 |    |          |                                                                                                                                                                                 |
| 19 | 19 | Cochrane | degenerat* near (disc* or disk*)                                                                                                                                                |
| 20 |    |          |                                                                                                                                                                                 |
| 21 | 20 | Cochrane | stenosis near (spine or root or spinal)                                                                                                                                         |
| 22 |    |          |                                                                                                                                                                                 |
| 23 |    |          |                                                                                                                                                                                 |
| 24 | 21 | Cochrane | displace* near (disc* or disk*)                                                                                                                                                 |
| 25 |    |          |                                                                                                                                                                                 |
| 26 | 22 | Cochrane | prolap* near (disc* or disk*)                                                                                                                                                   |
| 27 |    |          |                                                                                                                                                                                 |
| 28 |    |          |                                                                                                                                                                                 |
| 29 | 23 | Cochrane | MeSH descriptor: [Sciatic Neuropathy] explode all trees                                                                                                                         |
| 30 |    |          |                                                                                                                                                                                 |
| 31 |    |          |                                                                                                                                                                                 |
| 32 | 24 | Cochrane | sciatic*                                                                                                                                                                        |
| 33 |    |          |                                                                                                                                                                                 |
| 34 | 25 | Cochrane | back disorder*                                                                                                                                                                  |
| 35 |    |          |                                                                                                                                                                                 |
| 36 |    |          |                                                                                                                                                                                 |
| 37 | 26 | Cochrane | back near pain                                                                                                                                                                  |
| 38 |    |          |                                                                                                                                                                                 |
| 39 |    |          |                                                                                                                                                                                 |
| 40 | 27 | Cochrane | #1 or #2 or #3 or #4 or #5 or #6 or #7 or #8 or #9 or #10<br>or #11 or #12 or #13 or #14 or #15 or #16 or #17 or #18<br>or #19 or #20 or #21 or #22 or #23 or #24 or #25 or #26 |
| 41 |    |          |                                                                                                                                                                                 |
| 42 |    |          |                                                                                                                                                                                 |
| 43 |    |          |                                                                                                                                                                                 |
| 44 | 28 | Cochrane | MeSH descriptor: [Radio Waves] explode all trees                                                                                                                                |
| 45 |    |          |                                                                                                                                                                                 |
| 46 |    |          |                                                                                                                                                                                 |
| 47 | 29 | Cochrane | MeSH descriptor: [Pulsed Radiofrequency Treatment]<br>explode all trees                                                                                                         |
| 48 |    |          |                                                                                                                                                                                 |
| 49 |    |          |                                                                                                                                                                                 |
| 50 | 30 | Cochrane | radiofrequency                                                                                                                                                                  |
| 51 |    |          |                                                                                                                                                                                 |
| 52 |    |          |                                                                                                                                                                                 |
| 53 | 31 | Cochrane | radio frequency or radio-frequency                                                                                                                                              |
| 54 |    |          |                                                                                                                                                                                 |
| 55 |    |          |                                                                                                                                                                                 |
| 56 | 32 | Cochrane | MeSH descriptor: [Electrocoagulation] explode all trees                                                                                                                         |
| 57 |    |          |                                                                                                                                                                                 |
| 58 | 33 | Cochrane | electrocoag*                                                                                                                                                                    |
| 59 |    |          |                                                                                                                                                                                 |
| 60 |    |          |                                                                                                                                                                                 |

- 1  
2  
3 34 Cochrane thermocoag\*  
4  
5  
6 35 Cochrane neurotom\* or neuroly\*  
7  
8 36 Cochrane #28 or #29 or #30 or #31 or #32 or #33 or #34 or #35  
9  
10  
11 37 Cochrane #27 and #36 in Trials  
12  
13  
14  
15  
16  
17  
18  
19  
20  
21  
22  
23  
24  
25  
26  
27  
28  
29  
30  
31  
32  
33  
34  
35  
36  
37  
38  
39  
40  
41  
42  
43  
44  
45  
46  
47  
48  
49  
50  
51  
52  
53  
54  
55  
56  
57  
58  
59  
60

For peer review only

## Appendix 2 Study characteristics

| Study                         | N   | Inclusion criteria                                                                                        |                                                                                             | Mean age (SD)                                    | Mean pain score (SD)                   | Intervention                                                            | Control                                                                   | Funding                                                                                                                                             |
|-------------------------------|-----|-----------------------------------------------------------------------------------------------------------|---------------------------------------------------------------------------------------------|--------------------------------------------------|----------------------------------------|-------------------------------------------------------------------------|---------------------------------------------------------------------------|-----------------------------------------------------------------------------------------------------------------------------------------------------|
| <b>RD of the facet joints</b> |     |                                                                                                           |                                                                                             |                                                  |                                        |                                                                         |                                                                           |                                                                                                                                                     |
| <b>Gallagher 1994</b>         | 41  | Low back pain >3 months duration with symptoms typical of facet joint pain                                | Improvement (n=30) or equivocal (n=11) response to anaesthetic block                        | NR                                               | VAS RD 5.8 (1.78); Sham 7.2 (1.94)     | Nerves above and below painful joint denervated at 80° for 90 seconds.  | Nerves also identified with stimulation but no heat lesion made           | NR                                                                                                                                                  |
| <b>Juch 2017</b>              | 251 | Low back pain without response to conservative management and considered to be related to the facet joint | Positive response to anaesthetic block (reported 50% pain relief 30-90 minutes after block) | RD 53.0 (11.5); Control 52.6 (10.8)              | NRS RD 7.14 (1.38) Control 7.19 (1.29) | Denervation at 90° for 90s of L3-4, L4-5 or L5-S1 with exercise program | Exercise program                                                          | The Netherlands Organization for Health Research and Development, by the Dutch Society for Anesthesiology, and the Dutch health insurance companies |
| <b>Leclaire 2001</b>          | 70  | Low back pain for >3 months                                                                               | “Significant” relief of back pain for >24h following facet injections                       | RD 46.7 (9.3); Sham 46.4 (9.8)                   | VAS RD 5.19 (2.67); Sham 5.15 (2.08)   | RD with fluoroscopic guidance at 80°C for 90s of at least 2 levels      | Nerves also identified with stimulation but electrode only heated to 37°C | Institut de recherche en sante´ and se´curite´ du travail du Que´bec                                                                                |
| <b>Moussa 2016</b>            | 80  | Low back pain for >1 year without response to conservative management                                     | Complete or near complete reduction of CLBP on VAS 30 min after 2                           | RD capsule 58.1 (NR); RD conventional 56.5 (NR); | VAS RD 8.22 (NR); Sham 7.83 (NR)       | RD of facet capsule on medial and lateral aspect or                     | Same procedure without elect current turned on                            | No funding received                                                                                                                                 |

|                         |    |                                                                                                           |                                                                                              |                                |                                  |                                                                                        |                                                                       |                                                   |
|-------------------------|----|-----------------------------------------------------------------------------------------------------------|----------------------------------------------------------------------------------------------|--------------------------------|----------------------------------|----------------------------------------------------------------------------------------|-----------------------------------------------------------------------|---------------------------------------------------|
|                         |    |                                                                                                           | injections separated by >2 weeks                                                             | Sham 55.9 (NR)                 |                                  | conventional RD at 85°C for 90s                                                        |                                                                       |                                                   |
| <b>Nath 2008</b>        | 40 | Low back pain for >2 years, not responded to previous treatment, pain attributable to lumbar facet joints | 80% pain relief on 3 medial branch blocks                                                    | 56 (range, 36–79)              | VAS RD 5.98 (NR); Sham 4.38 (NR) | RD at 85°C for 60s with additional lesions just lateral and medial to the target nerve | Same procedure as RD but electrode tip remained at body temperature   | No funding received                               |
| <b>Tekin 2007</b>       | 40 | Back pain for >6 months with focal pain over the facet joints and unresponsive to conservative treatments | >50% reduction in VAS pain 30 minutes after diagnostic medial branch block                   | RD 60.5 (8.5); Sham 57.9 (9.3) | VAS RD 6.5 (1.5); Sham 6.8 (1.6) | RD at same levels as diagnostic blocks at 80°C for 90s.                                | Same procedure as RD but with current switched off                    | Not reported                                      |
| <b>Van Kleef 1999</b>   | 32 | Low back pain of >12 months duration, failure of conservative management                                  | >50% reduction in pain following diagnostic nerve block of L3-L5<br>Baseline VAS score of >4 | RD 46.6 (7.4); Sham 41.4 (7.5) | VAS RD 5.2 (1.7); Sham 5.2 (1.6) | RD at 80°C for 60s                                                                     | Same procedure as RD but with current switched off                    | The Nederlandse organisatie voor wetenschappelijk |
| <b>Van Tilburg 2016</b> | 60 | Low back pain for >3 months and failure of conservative management                                        | Decrease of >2 on medial branch block                                                        | RD 65 (12); Sham 58 (12)       | NRS RD 7.2 (1.4); Sham 7.4 (0.8) | RD at 80°C for 60s per level for three steps with physiotherapy                        | Same procedure as RD but with current switched off with physiotherapy | No funding from a commercial party                |
| <b>Van Wijk 2005</b>    | 81 | Low back pain for >6 months                                                                               | ≥50% reduction on                                                                            | RD 46.9 (11.5);                | VAS RD 5.8 (1.8);                | RD 80°C for 60 seconds                                                                 | Same procedure as                                                     | Grant from the Dutch Health                       |

1  
2  
3  
4  
5  
6  
7  
8  
9  
10  
11  
12  
13  
14  
15  
16  
17  
18  
19  
20  
21  
22  
23  
24  
25  
26  
27  
28  
29  
30  
31  
32  
33  
34  
35  
36  
37  
38  
39  
40  
41  
42  
43  
44  
45  
46

diagnostic block Sham 48.1 (12.6) Sham 6.5 (1.8) at the levels concerned RD but with current switched off Insurance Council

**RD of the sacroiliac joints**

|                   |     |                                                                                                                                     |                                                                                                                   |                                     |                                         |                                                                                                         |                                                                       |                                                                                                                                                             |
|-------------------|-----|-------------------------------------------------------------------------------------------------------------------------------------|-------------------------------------------------------------------------------------------------------------------|-------------------------------------|-----------------------------------------|---------------------------------------------------------------------------------------------------------|-----------------------------------------------------------------------|-------------------------------------------------------------------------------------------------------------------------------------------------------------|
| <b>Cohen 2008</b> | 28  | Axial low back or buttock pain ≥ 6 months, tenderness overlying the sacroiliac joint(s), failure to respond to conservative therapy | ≥ 75% pain relief for ≥3h following diagnostic sacroiliac joint injection, but back near baseline within 2 months | RD 51.9 (13.6); Sham 51.8 (13.1)    | VAS RD 6.1 (1.8); Sham 6.5 (1.9)        | RD 80°C for 90 seconds using cooling probe technology (Cooled RD)                                       | Same procedure as RD but no current applied                           | John P. Murtha Neuroscience and Pain Institute, the Army Regional Anesthesia & Pain Medicine Initiative, and National Institutes of Health grant # MH075884 |
| <b>Juch 2017</b>  | 228 | Low back pain without response to conservative management, considered to be related to the sacroiliac joint.                        | Positive response to anaesthetic block (reported 50% pain relief 30-90 minutes after block)                       | RD 51.6 (10.9); Control 51.1 (12.2) | NRS RD 7.17 (1.65); Control 7.06 (1.43) | RD - 60° for 2.5 min per lesion of S1, S2 and S3 with exercise program                                  | Exercise program                                                      | The Netherlands Organization for Health Research and Development, by the Dutch Society for Anesthesiology, and the Dutch health insurance companies         |
| <b>Mehta 2018</b> | 17  | CLBP for >6 months. >5 on NRS                                                                                                       | >80% pain reduction on 2 diagnostic blocks                                                                        | RD 56.6 (NR); Sham 62.6 (NR)        | VAS RD 8.1 (0.8); Sham 7.3 (0.8)        | RD of the L5 medial branch of the primary dorsal root nerve and strip lesioning of the lateral branches | Identical to active RD treatment except that no RF energy was applied | None                                                                                                                                                        |

|                                       |    |                                                                                                          |                                                                                                                                                  |                                            |                                           |                                                                                                                       |                                                                   |                                                                     |
|---------------------------------------|----|----------------------------------------------------------------------------------------------------------|--------------------------------------------------------------------------------------------------------------------------------------------------|--------------------------------------------|-------------------------------------------|-----------------------------------------------------------------------------------------------------------------------|-------------------------------------------------------------------|---------------------------------------------------------------------|
|                                       |    |                                                                                                          |                                                                                                                                                  |                                            |                                           | of the S1, 2, and<br>3 nerve roots                                                                                    |                                                                   |                                                                     |
| <b>Patel 2012</b>                     | 51 | Pain for ≥6 months,<br>3-day average NRS<br>between 4 and 8,<br>failure of<br>conservative<br>management | ≥75% pain<br>reduction for<br>4h-7 days on<br>two sets of<br>anaesthetic<br>blocks and<br>back to<br>baseline by<br>start of the<br>study        | RD 56 (15);<br>Sham 64<br>(14)             | NRS RD 6.1<br>(1.3);<br>Sham 5.8<br>(1.3) | RD at 60°C for<br>150s of L5<br>dorsal ramus<br>and then acral<br>lateral branches<br>of S1, S2 and<br>S3 (cooled RD) | Same<br>procedure as<br>RD but RF<br>energy was<br>not delivered. | Baylis Medical                                                      |
| <b>Van Tilburg<br/>2016</b>           | 60 | Sacroiliac joint pain<br>for >3 months,<br>failure of<br>conservative<br>management                      | Decrease of<br>≥2 on NRS<br>following<br>diagnostic<br>block                                                                                     | RD 59.5<br>(27); Sham<br>62 (18)           | NRS RD 7.2<br>(1.4);<br>Sham 7.5<br>(1.2) | 85°C each<br>step for 90s,<br>total of 5 steps                                                                        | Same<br>procedure as<br>RD but no<br>heat lesions<br>made         | Not reported                                                        |
| <b>RD of the intervertebral discs</b> |    |                                                                                                          |                                                                                                                                                  |                                            |                                           |                                                                                                                       |                                                                   |                                                                     |
| <b>Barendse<br/>2001</b>              | 28 | Non-specific LBP for<br>>1y, failure of<br>conservative<br>management                                    | >50% pain<br>relief 30<br>minutes after<br>an analgesic<br>discography<br>at L4–L5 and<br>L5–S1.<br>Patients with<br>multilevel pain<br>excluded | RD 40.8<br>(7.5); Sham<br>45.2 (8.4)       | VAS RD 6.5<br>(1.3);<br>Sham 5.5<br>(1.1) | 70°C for 90s<br>without<br>anaesthetic                                                                                | Same<br>procedure as<br>RD but no<br>current<br>applied           | Not reported                                                        |
| <b>Desai 2016</b>                     | 63 | Lumbar discogenic<br>pain for ≥6 months,<br>unresponsive to<br>conservative<br>management                | Diagnosed via<br>provocation<br>discography -<br>definite<br>single-level<br>concordant                                                          | Mean age 41<br>(11);<br>Control 43<br>(11) | VAS RD 6.7<br>(NR);<br>Sham 7 (NR)        | RD at 50°C for<br>15 minutes and<br>then 60°C for<br>2.5 min (bopolar<br>cooled RD) with<br>conventional              | Conventional<br>medical<br>management                             | Halyard Health,<br>Inc. (formerly<br>Kimberly-Clark<br>Health Care) |

|                                              |    |                                                                                                                                                    |                                                                                                                                             |                                  |                                      |                                                                                                        |                                                                                                                                   |                                                                |
|----------------------------------------------|----|----------------------------------------------------------------------------------------------------------------------------------------------------|---------------------------------------------------------------------------------------------------------------------------------------------|----------------------------------|--------------------------------------|--------------------------------------------------------------------------------------------------------|-----------------------------------------------------------------------------------------------------------------------------------|----------------------------------------------------------------|
|                                              |    |                                                                                                                                                    | pain on manometry                                                                                                                           |                                  |                                      | medical management                                                                                     |                                                                                                                                   |                                                                |
| <b>Kapural 2013</b>                          | 55 | CLBP unresponsive to conservative management for ≥6 months; no surgical interventions within previous 3 months                                     | Single-level degenerative disc disease or two-level disease without evidence of additional degenerative changes in other disc spaces on MRI | RD 40.4 (10.3); Sham 38.4 (10.4) | VAS RD 7.13 (1.61); Sham 7.18 (1.98) | RD at 45°C bipolar for 15 minutes or 50°C bipolar for 15 minutes and monopolar at 60°C for 2.5 minutes | Mimicked active treatment, except that introducers and electrodes positioned just outside of the disc, and no RF energy delivered | Baylis Medical                                                 |
| <b>Kvarstein 2009</b>                        | 20 | Unremitting low back pain for more than 6 months; Pain intensity ≥5 /10 and low back pain greater than leg pain; Failure on conservative treatment | Positive one-level pain provocation discography                                                                                             | RD 44.7 (10.1); Sham 39.6 (8.9)  | NRS RD 4.6 (1.8); Sham 5.5 (2.0)     | RD increased by 5°C every second minute to 4-min interval at 65°C (from 50°C)                          | Exposed to a similar intervention, but the annulus was not exposed to RF heating                                                  | Radionics, TYCO Healthcare Group provided the discTRODE probes |
| <b>Van Tilburg 2017</b>                      | 60 | Low back pain >3 months and symptoms suggestive of lumbar disc problem                                                                             | Reduction of ≥2 on a numerical rating scale (0–10) after a diagnostic ramus communicans test block                                          | RD 50.5 (13.9); Sham 50.1 (12.3) | NRS 7.8 (1.05); Sham 7.8 (1.05)      | RD treatment at 80 °C for 60s per level                                                                | Same procedure but without RF treatment                                                                                           | No support received that influenced submitted work             |
| <b>RD of the vertebrae body and endplate</b> |    |                                                                                                                                                    |                                                                                                                                             |                                  |                                      |                                                                                                        |                                                                                                                                   |                                                                |

|    |                   |     |                      |               |             |             |                   |               |              |
|----|-------------------|-----|----------------------|---------------|-------------|-------------|-------------------|---------------|--------------|
| 1  |                   |     |                      |               |             |             |                   |               |              |
| 2  |                   |     |                      |               |             |             |                   |               |              |
| 3  | <b>Fischgrund</b> | 225 | CLBP ≥6 months,      | No diagnostic | RD 46.9     | VAS RD 6.73 | Thermal           | Same          | Not reported |
| 4  | <b>2018</b>       |     | not responded to     | block for     | (range 26–  | (1.38);     | ablation at       | procedure as  |              |
| 5  |                   |     | conservative         | inclusion     | 69); Sham   | Sham 6.64   | the terminus of   | RD but only   |              |
| 6  |                   |     | treatment, Type 1 or |               | 47.1 (range | (1.34)      | the basivertebral | docking       |              |
| 7  |                   |     | Type 2 Modic         |               | 25–69)      |             | nerve 85°C for    | introducer    |              |
| 8  |                   |     | changes required     |               |             |             | 15 min            | cannula 1–2   |              |
| 9  |                   |     | at the proposed      |               |             |             |                   | mm            |              |
| 10 |                   |     | treatment levels     |               |             |             |                   | into the      |              |
| 11 |                   |     |                      |               |             |             |                   | pedicle and   |              |
| 12 |                   |     |                      |               |             |             |                   | simulating RD |              |
| 13 |                   |     |                      |               |             |             |                   |               |              |
| 14 |                   |     |                      |               |             |             |                   |               |              |
| 15 |                   |     |                      |               |             |             |                   |               |              |
| 16 |                   |     |                      |               |             |             |                   |               |              |
| 17 |                   |     |                      |               |             |             |                   |               |              |
| 18 |                   |     |                      |               |             |             |                   |               |              |
| 19 |                   |     |                      |               |             |             |                   |               |              |
| 20 |                   |     |                      |               |             |             |                   |               |              |
| 21 |                   |     |                      |               |             |             |                   |               |              |
| 22 |                   |     |                      |               |             |             |                   |               |              |
| 23 |                   |     |                      |               |             |             |                   |               |              |
| 24 |                   |     |                      |               |             |             |                   |               |              |
| 25 |                   |     |                      |               |             |             |                   |               |              |
| 26 |                   |     |                      |               |             |             |                   |               |              |
| 27 |                   |     |                      |               |             |             |                   |               |              |
| 28 |                   |     |                      |               |             |             |                   |               |              |
| 29 |                   |     |                      |               |             |             |                   |               |              |
| 30 |                   |     |                      |               |             |             |                   |               |              |
| 31 |                   |     |                      |               |             |             |                   |               |              |
| 32 |                   |     |                      |               |             |             |                   |               |              |
| 33 |                   |     |                      |               |             |             |                   |               |              |
| 34 |                   |     |                      |               |             |             |                   |               |              |
| 35 |                   |     |                      |               |             |             |                   |               |              |
| 36 |                   |     |                      |               |             |             |                   |               |              |
| 37 |                   |     |                      |               |             |             |                   |               |              |
| 38 |                   |     |                      |               |             |             |                   |               |              |
| 39 |                   |     |                      |               |             |             |                   |               |              |
| 40 |                   |     |                      |               |             |             |                   |               |              |
| 41 |                   |     |                      |               |             |             |                   |               |              |
| 42 |                   |     |                      |               |             |             |                   |               |              |
| 43 |                   |     |                      |               |             |             |                   |               |              |
| 44 |                   |     |                      |               |             |             |                   |               |              |
| 45 |                   |     |                      |               |             |             |                   |               |              |
| 46 |                   |     |                      |               |             |             |                   |               |              |

CLBP, chronic low back pain; N, number of trials; NRS, numeric rating scale; RD, radiofrequency denervation; SD, standard deviation; VAS, visual analogue scale.



# BMJ Open

## Radiofrequency denervation for chronic back pain: a systematic review and meta-analysis

|                                 |                                                                                                                                                                                                                                                                                                                                                                                                                                            |
|---------------------------------|--------------------------------------------------------------------------------------------------------------------------------------------------------------------------------------------------------------------------------------------------------------------------------------------------------------------------------------------------------------------------------------------------------------------------------------------|
| Journal:                        | <i>BMJ Open</i>                                                                                                                                                                                                                                                                                                                                                                                                                            |
| Manuscript ID                   | bmjopen-2019-035540.R1                                                                                                                                                                                                                                                                                                                                                                                                                     |
| Article Type:                   | Original research                                                                                                                                                                                                                                                                                                                                                                                                                          |
| Date Submitted by the Author:   | 02-May-2020                                                                                                                                                                                                                                                                                                                                                                                                                                |
| Complete List of Authors:       | Chappell, Mary; Cambridgeshire County Council, Public Health Directorate<br>Lakshman, Raj; Cambridgeshire County Council, Public Health Directorate; University of Cambridge, Medical Research Council Epidemiology Unit<br>Trotter, Patrick; Cambridge University Hospitals NHS Foundation Trust<br>Abrahams, Mark; Cambridge University Hospitals NHS Foundation Trust<br>Lee, Michael; University of Cambridge, Division of Anaesthesia |
| <b>Primary Subject Heading</b>: | Rheumatology                                                                                                                                                                                                                                                                                                                                                                                                                               |
| Secondary Subject Heading:      | Neurology                                                                                                                                                                                                                                                                                                                                                                                                                                  |
| Keywords:                       | Back pain < ORTHOPAEDIC & TRAUMA SURGERY, Rheumatology < INTERNAL MEDICINE, Neurology < INTERNAL MEDICINE, PAIN MANAGEMENT                                                                                                                                                                                                                                                                                                                 |
|                                 |                                                                                                                                                                                                                                                                                                                                                                                                                                            |

SCHOLARONE™  
Manuscripts



I, the Submitting Author has the right to grant and does grant on behalf of all authors of the Work (as defined in the below author licence), an exclusive licence and/or a non-exclusive licence for contributions from authors who are: i) UK Crown employees; ii) where BMJ has agreed a CC-BY licence shall apply, and/or iii) in accordance with the terms applicable for US Federal Government officers or employees acting as part of their official duties; on a worldwide, perpetual, irrevocable, royalty-free basis to BMJ Publishing Group Ltd ("BMJ") its licensees and where the relevant Journal is co-owned by BMJ to the co-owners of the Journal, to publish the Work in this journal and any other BMJ products and to exploit all rights, as set out in our [licence](#).

The Submitting Author accepts and understands that any supply made under these terms is made by BMJ to the Submitting Author unless you are acting as an employee on behalf of your employer or a postgraduate student of an affiliated institution which is paying any applicable article publishing charge ("APC") for Open Access articles. Where the Submitting Author wishes to make the Work available on an Open Access basis (and intends to pay the relevant APC), the terms of reuse of such Open Access shall be governed by a Creative Commons licence – details of these licences and which [Creative Commons](#) licence will apply to this Work are set out in our licence referred to above.

Other than as permitted in any relevant BMJ Author's Self Archiving Policies, I confirm this Work has not been accepted for publication elsewhere, is not being considered for publication elsewhere and does not duplicate material already published. I confirm all authors consent to publication of this Work and authorise the granting of this licence.

1  
2  
3 **Radiofrequency denervation for chronic back pain: a systematic review and**  
4 **meta-analysis**  
5  
6

7  
8 Mary E Chappell<sup>1</sup>, Raj Lakshman<sup>1,2</sup>, Patrick Trotter<sup>3</sup>, Mark J Abrahams<sup>3</sup>, Michael C  
9 Lee<sup>4</sup>  
10

11  
12  
13 <sup>1</sup>Public Health Directorate, Cambridgeshire County Council, Cambridge, UK  
14

15  
16 <sup>2</sup>Medical Research Council Epidemiology Unit, University of Cambridge, Cambridge  
17  
18 UK  
19

20  
21 <sup>3</sup>Cambridge University Hospitals NHS Foundation trust, Cambridge, UK  
22

23  
24 <sup>4</sup>Division of Anaesthesia, University of Cambridge, Cambridge, UK  
25  
26  
27  
28

29  
30 Correspondence to: Mary E Chappell, Public Health Directorate, Cambridgeshire  
31  
32 County Council, Cambridge CB3 0AP, UK. Tel. 01223 729037  
33

34  
35 Email [mary.chappell@cambridgeshire.gov.uk](mailto:mary.chappell@cambridgeshire.gov.uk)  
36  
37  
38  
39

40  
41 Word count:

42  
43 Abstract 204  
44

45  
46 Main text 4,080  
47  
48  
49  
50  
51  
52  
53  
54  
55  
56  
57  
58  
59  
60

## Abstract

Objectives: To assess the effectiveness of radiofrequency denervation of lumbosacral anatomical targets for the management of chronic back pain.

Design: Systematic review and meta-analysis of randomised controlled trials.

Methods: A database search (Medline, Medline in Process, Embase, CINAHL and the Cochrane library) was conducted to April 2019 for placebo or no-treatment controlled trials of radiofrequency denervation for the management of chronic back pain. Included trials were quality assessed using the Cochrane risk of bias tool and the quality of outcomes assessed using the GRADE approach. Meta-analysis was conducted to calculate mean difference in post-treatment pain score.

Results: Nineteen randomised controlled trials were included in the review. There appears to be short-term pain relief (1-3 months) provided by radiofrequency denervation of sacroiliac joint and inter-vertebral discs but the placebo effect is large and additional intervention effect size is small (<1 on a 11 point (0-10) pain scale). Longer-term effectiveness is uncertain.

Conclusions: Radiofrequency denervation of selected lumbosacral targets appears to have a small, short-term, positive effect for the management of patients with chronic back pain. However, the quality of evidence for the majority of outcomes is low or very low quality and there is still a degree of uncertainty, particularly around the duration of effect.

1  
2  
3  
4  
5  
6 Strengths and limitations of this study:  
7  
8

- 9
- 10 • This review brings together a number of recent trials with earlier trials so that  
11 there is a sizable sum of evidence on which to assess the effectiveness of  
12 radiofrequency denervation for back pain.  
13
  - 14 • Due to the invasive nature of the procedure, it is difficult to perform truly  
15 patient or provider blinded trials and this brings some uncertainty around  
16 findings.  
17
  - 18 • There is limited reporting of long-term outcomes for the effectiveness of  
19 radiofrequency denervation.  
20  
21  
22  
23  
24  
25  
26  
27  
28  
29  
30  
31  
32  
33  
34  
35  
36  
37  
38  
39  
40  
41  
42  
43  
44  
45  
46  
47  
48  
49  
50  
51  
52  
53  
54  
55  
56  
57  
58  
59  
60

## Introduction

Back pain is an extremely common symptom experienced by people of all ages, and can be attributed to a wide variety of disease processes.<sup>1,2</sup> Low back pain is now the leading cause of disability worldwide and back pain is associated with a substantial economic burden, with high medical and societal costs.<sup>3</sup> Studies have shown that a large proportion of medical costs come from hospital admissions and physical therapy for the management of back pain.<sup>4</sup> However, there are also indirect costs associated with chronic or recurrent back pain that are difficult to quantify relating to work absenteeism and related productivity.<sup>1,3,4</sup> In many cases, back pain is non-specific, or structural pathology amenable to surgical correction cannot be identified.<sup>5-7</sup> Hence, patients and practitioners continue to seek non-surgical alternatives for the management of back pain.

Radiofrequency denervation (RD) involves the application of an alternating electric current (250 to 500kHz) via a needle probe to induce a highly localised rise in tissue temperature at the needle tip.<sup>8</sup> The needle tip is usually placed under fluoroscopic guidance to enable selective ablation of sensory nerve branches that supply facet joints, sacroiliac joint or other structures that comprise the lumbosacral spine. RD would therefore offer relief of pain by attenuating sensory signals from the lumbosacral spine.<sup>9</sup>

Despite its use for over 20 years,<sup>10</sup> the effectiveness of RD targeted at the anatomy of lumbosacral spine is not yet established, with randomised controlled trials (RCTs) continuing to be performed. A number of trials have been published since the publication of the last high quality review in 2015<sup>11</sup> and our systematic review aimed to bring together this evidence in an attempt to evaluate whether RD is an effective intervention for the management of chronic non-specific back pain.

## Materials and Methods

### *Search strategy*

A search was conducted in Medline, Medline in Process, Embase, CINHALL and the Cochrane library from January 2014 to April 2019 (Appendix 1). Previous systematic reviews were used to obtain additional relevant studies published pre 2014.

### *Inclusion criteria*

RCTs comparing RD of the spine with a control in patients with back pain with or without sciatica were included. Only trials of radiofrequency procedures for the purpose of ablating or denaturing sensory nerve branches or nociceptors that supply the lumbosacral spine were considered for inclusion. Trials of pulsed RF,<sup>12</sup> or other forms of 'neuromodulatory' procedures that do not aim to ablate or denature these targets, were excluded from the review. Control groups where there was no active treatment were considered for inclusion but trials with potentially effective comparators e.g. corticosteroid injections, were excluded. Only trials of patients with back pain without a definite or surgically remediable cause (chronic non-specific back pain) were included in the review. The outcome for the review was patient-reported pain score e.g. Visual Analogue Scale or Numeric Rating Scale.

### *Data collection and quality assessment*

Trial characteristics were recorded from included studies. Study results were extracted independently by two authors (MC, PT), with any disagreements resolved by consensus. The overall strength of evidence was assessed using the GRADE approach.<sup>13</sup> Risk of bias was assessed using the Cochrane Risk of Bias tool.<sup>14</sup> Any outcome where more than half of trials were considered to have a high or unclear risk of bias was downgraded. Outcomes were also downgraded where heterogeneity

1  
2  
3 in the meta-analysis was greater than 50%. Optimal sample size was taken to be 85  
4  
5 participants per study arm (as calculated in the Juch 2017 trial<sup>15</sup>) and studies with  
6  
7 less than 170 participants, and/or where the 95% confidence intervals included the  
8  
9 line of no effect, were downgraded for imprecision. Publication bias was assessed  
10  
11 using funnel plots and outcomes downgraded where there was a high certainty of  
12  
13 publication bias.  
14  
15

### 16 17 *Data analysis*

18  
19  
20 Meta-analyses were conducted in RevMan<sup>16</sup> with random effects models since the  
21  
22 included studies investigated effectiveness in different population groups with  
23  
24 varying intervention and control group treatments. Pain score at 1-3 months was  
25  
26 taken as the primary outcome (longest time point used for studies reporting multiple  
27  
28 time points), allowing outcome from a larger number of studies to be combined. Pain  
29  
30 score data were reported on a 0-10 point scale (Visual Analogue Scale or Numeric  
31  
32 Rating Scale) in all studies and the mean difference was therefore calculated without  
33  
34 standardisation as done in the previous Cochrane review.<sup>11</sup> Studies with different  
35  
36 spinal targets e.g. facet joints, sacroiliac joints or inter-vertebrae disc, were  
37  
38 separated in the analysis. For facet joint pain, a plot of treatment versus no  
39  
40 treatment/sham was produced by fixed effects meta-analysis of scores for each arm.  
41  
42  
43 A sensitivity analysis was conducted to check the validity of findings by removing  
44  
45 studies considered to have a particularly high risk of bias. Subgroup analysis to  
46  
47 explore study heterogeneity was not conducted because of the small number of  
48  
49 studies and high likelihood of reaching spurious conclusions.  
50  
51  
52  
53

## 54 55 **Results**

### 56 57 58 *Study characteristics*

59  
60



1  
2  
3 The search identified 922 citations of which 229 were duplicates. Studies were  
4 excluded as shown in figure 1. Of the 693 citations reviewed 8 new trials were  
5 identified as well as 11 from a previous Cochrane review.<sup>11</sup> Exclusions were made  
6 as shown in figure 1. Nineteen trials were included in the review and their  
7 characteristics are shown in appendix 2. Trials investigated the effectiveness of RD  
8 of the facet joint (supplied by medial branch of the dorsal spinal ramus),<sup>15,17-24</sup> the  
9 sacroiliac joints,<sup>15,25-28</sup> the intervertebral discs<sup>29-33</sup>, or vertebrae end-plate (supplied  
10 by the basivertebral nerve).<sup>34</sup> The majority of trials used a sham control group but  
11 one large trial compared RD with no treatment (both groups received an exercise  
12 program) and one small trial compared RD plus conventional medical with  
13 conventional medical management alone (including self-care, medications and  
14 physical and cognitive therapy).

### 31 *Study quality*

32 Sham-controlled trials generally appear to have conducted adequate randomisation  
33 but allocation concealment was often unclear. Processes were in place to blind  
34 patients and providers and outcome assessors. In some trials maintenance of  
35 blinding was unclear as it was evident that patients undergoing sham procedures  
36 were offered RD in case of sham treatment failure. In these cases, blinding would  
37 have been broken. Most trials did not report dropouts and there was unclear risk of  
38 attrition bias. The outcome for this review was pain score and this was reported in all  
39 trials and reporting bias was not considered to be an issue in the review. Four trials  
40 were identified as having high risk of bias and were removed in the sensitivity  
41 analysis.<sup>17,19,24,25</sup>

### 57 *Overall quality of the evidence*

1  
2  
3 The majority of outcomes were graded down for imprecision and all outcomes were  
4  
5 downgraded for potential risk of bias. Consequently almost all outcomes were  
6  
7 graded as low quality. However, in some cases, high heterogeneity was also present  
8  
9 and these outcomes were graded as very low quality. Publication bias was  
10  
11 suggested by asymmetry in a number of the funnel plots. However, there was  
12  
13 uncertainty due to the small numbers of studies and outcomes were not graded  
14  
15 down for publication bias.  
16  
17

### 18 19 *Study findings*

20  
21  
22 Results of the meta-analyses are shown in table 1.  
23

#### 24 25 *RD of the facet joints*

26  
27  
28 Meta-analysis of pain scores at 1-3 months post procedure (longest time point used  
29  
30 for studies with multiple time points) (marked on a 0-10 scale) was performed to  
31  
32 allow combination of data from the maximum number of studies, and results are  
33  
34 shown in figure 2 and table 1. The effect size was similar when all trials were  
35  
36 included (7 trials, MD -0.56, CI -1.13, 0.01) or where just the sham-controlled trials  
37  
38 were included (6 trials, MD -0.63, CI -1.39, 0.12) but the effect was not significant for  
39  
40 either. We also considered outcomes at 6 and 12 months, where data were available  
41  
42 to explore longer term outcomes, but did not find any significant effect (table 1).  
43  
44  
45

#### 46 47 *RD of the sacroiliac joints*

48  
49  
50 Figure 3 shows the meta-analysis of trials for pain score at 1-3 months (longest time  
51  
52 point used for studies with multiple time points). There was a significant effect of RD  
53  
54 for the analysis including all trials (5 trials, MD -1.53, CI -2.62, -0.45) or just sham-  
55  
56 controlled trials (4 trials, MD -1.89, CI -3.45, -0.34). Only one trial<sup>15</sup> assessed  
57  
58  
59  
60

1  
2  
3 outcome at later time points and this showed no significant difference compared to a  
4 no treatment control (table 1).  
5  
6

#### 7 8 *RD of the intervertebral discs* 9

10 Pain score at 1-3 months post-treatment was significantly lower for RD compared  
11 with control in all trials (4 trials, MD -0.98, CI -1.84, -0.12) but not for sham-controlled  
12 trials alone (3 trials, MD -0.63, CI -1.36, 0.10) (figure 4). Pain score was significantly  
13 lower for RD when all trials and sham-controlled trials were considered at 6 months  
14 but, for one trial assessing outcome at one year, it was not (table 1).  
15  
16  
17  
18  
19  
20  
21

#### 22 23 *RD of the vertebrae body and end plate* 24

25 One recent trial of RD for vertebrae body and end plate (basivertebral nerve  
26 ablation)<sup>34</sup> did not show significant benefits of RD compared with sham at 3, 6 or 12  
27 months (table 1).  
28  
29  
30  
31

#### 32 33 *Sensitivity analysis* 34

35 Four studies were removed in the sensitivity analysis due to a high risk of  
36 methodological bias<sup>17,19,24,25</sup> and the two non-sham controlled trials were also  
37 removed.<sup>15,32</sup> After the removal of these trials, outcome at 1-3 months for facet joint  
38 sham trials was still not significant (4 trials, MD -0.57, CI -1.60, 0.46) and 1-3 month  
39 outcome for sacroiliac sham trials became non-significant (3 trials, MD -1.21, CI -  
40 2.59, 0.16). The facet joint sham trial outcome at 6 months also became non-  
41 significant (1 trial, MD 0.18, CI -2.80, 3.16).  
42  
43  
44  
45  
46  
47  
48  
49  
50  
51

## 52 **Discussion** 53

### 54 55 *Main findings* 56 57 58 59 60

1  
2  
3 This systematic review presents evidence suggesting that RD of the lumbosacral  
4 spine may have a small positive but short-lived effect in patients with chronic back  
5 pain, depending on the precise part of the anatomy that is being targeted by the  
6 procedure. The quality of evidence for the majority of findings is low or very low  
7 quality and there is still a degree of uncertainty around this assertion, particularly  
8 around the duration of effect. The size of benefit appears to be small (<1 point on a  
9 0-10 pain scale) and there is limited data for outcomes beyond 6 months. These  
10 assertions apply to RD for sacroiliac joints, whereas evidence for benefit to other  
11 targets is more limited. RD for facet joints did not show a significant benefit on 1-3  
12 month outcome. There is a suggestion that there may be a benefit of RD for  
13 intervertebral discs but there is some inconsistency, with insignificant effect even for  
14 short-term outcomes.

15  
16  
17  
18  
19  
20  
21  
22  
23  
24  
25  
26  
27  
28  
29  
30  
31  
32  
33  
34  
35  
36  
37  
38  
39  
40  
41  
42  
43  
44  
45  
46  
47  
48  
49  
50  
51  
52  
53  
54  
55  
56  
57  
58  
59  
60  
What is also clear from the review is that both treatment and sham/no treatment  
groups improved during the trials. In the sham controlled studies, this may, in part,  
be due to placebo effect. However, the large trial by Juch et al<sup>15</sup> used a “no  
additional treatment” control (both groups received an exercise program) but all  
study arms improved over time. This may be because a high proportion of control  
study participants actually received RD (~30%) due to cross-over during the trial.  
However, this may also be explained by self-selection of participants who volunteer  
for research trials,<sup>35</sup> and hence are likely to make more of an active effort to manage  
their back pain. Such participants may be more likely to engage with, and be diligent  
in, exercise programs and seek medical assistance where needed.

In the trial by Juch et al., control group improvements may also be explained by the  
conservative management that they received. The exercise program employed was  
multi-disciplinary and comprised individual sessions over 8-12 hours focused on

1  
2  
3 quality of movement and behaviour, with access to psychological care. There is  
4  
5 evidence suggesting that patients with chronic back pain can benefit from pain  
6  
7 management programs that are of sufficient quality and duration.<sup>36</sup> Where patients  
8  
9 have not received an adequate trial of conservative therapy, they may benefit from  
10  
11 further exercise programs and other conservative management. It remains unclear  
12  
13 whether patients who are either unable or unwilling to engage with conservative  
14  
15 approaches to pain management would benefit from RD based interventions as a  
16  
17 first-line or isolated modality of treatment. Hence, there should be some reservation  
18  
19 when considering the use of RD treatment as a first-line, or isolated modality of pain  
20  
21 management.  
22  
23  
24  
25

26  
27 Regression to the mean may also have played a role in control group improvements  
28  
29 since patients in the trial were recruited with elevated pain, responsive to an  
30  
31 anaesthetic block. Back pain has been shown to have a varied aetiology, with some  
32  
33 patients experiencing fluctuating levels of pain over time, whilst other experience  
34  
35 constant high levels of pain.<sup>37,38</sup> For the majority of trials that reported it, duration of  
36  
37 back pain in participants prior to enrolment was 2-5 years and a proportion of these  
38  
39 were likely to have had high levels of constant pain. Some, however, may have been  
40  
41 experiencing fluctuating or recurrent pain within this period since the actual inclusion  
42  
43 criteria for most trials was pain for >3 or 6 months based on patient recall. If they  
44  
45 were recruited at a point where their pain had flared acutely, there would be a natural  
46  
47 tendency for that painful episode to resolve over time.  
48  
49  
50

### 51 52 *Strengths and limitations* 53

54  
55 A major strength of this review is that it collates a larger body of evidence than  
56  
57 previous systematic reviews, with the addition of a number of recent trials and  
58  
59 thorough assessment of the quality of the evidence. The review is able to tentatively  
60

1  
2  
3 answer the question about the effectiveness of RD for back pain; an assertion that,  
4  
5 to date, has proved to be very difficult due a paucity of evidence in this field.  
6  
7

8 This review utilises evidence from a previous Cochrane review<sup>11</sup> but the inclusion  
9  
10 criteria for our review had a narrower scope (included only sham- or conservative  
11  
12 management-controlled trials of conventional neuro-ablative RD). Since the previous  
13  
14 review appears to be of high quality, and we updated it with a thorough search of the  
15  
16 literature to date, there is assurance that all relevant trials were included.  
17  
18

19  
20 A limitation of this review is that it was difficult to truly assess risk of bias in trials  
21  
22 included in the review. Trial integrity rested heavily on the blinding of participants and  
23  
24 the outcome was likely to be highly subject to patients' preconceptions of the  
25  
26 different interventions given. Most trials did not report information that providers gave  
27  
28 patients about the different possible treatment arms e.g. did providers suggest to  
29  
30 patients that RD was the effective treatment and that sham or no treatment would be  
31  
32 ineffective? Where blinding was broken, these viewpoints may have influenced  
33  
34 patients' response. In some of the sham-controlled studies this was clearly evident.  
35  
36 For example, in some studies, before randomisation, patients were told that, if  
37  
38 randomised to sham, they could receive RD if they gained no benefit. Where blinding  
39  
40 was broken, these opinions were likely to influence patients' perception of their pain.  
41  
42 In other studies information from providers was not reported and it is difficult to  
43  
44 assess whether this type of bias occurred.  
45  
46  
47  
48  
49

50 The review may also be limited in its ability to ascertain the technical quality of  
51  
52 individual research trials. Even when examining the reported trial methodology, it is  
53  
54 difficult to conclusively identify trials that employed procedures that may be more or  
55  
56 less successful in denervating the specific lumbosacral anatomy. Some aspects of  
57  
58 RD procedures in earlier trials are considered outdated<sup>39,40</sup> but the advantages of  
59  
60

1  
2  
3 more recent procedures for RD remain unproven, and there is no clear evidence of  
4 their superiority. Sensitivity analysis based on technical quality was therefore  
5 considered unhelpful and not performed.  
6  
7  
8  
9

10 The review is also limited by the lack of long term data from trials. Most studies do  
11 not attempt to blind patients for more than 3 months and the longer follow up  
12 outcomes are considered to be at higher risk of bias. It is still therefore unclear  
13 whether RD of lumbosacral anatomy has long-term benefits for back pain.  
14  
15  
16  
17  
18

19 Finally, the review is limited in its ability to identify any aspects of patient or  
20 intervention characteristics that may make RD treatment more likely to be beneficial.  
21  
22

23 There is to date no reliable predictor of benefit on back pain for RD procedures  
24 based on clinical or imaging findings or diagnostic injections.<sup>41</sup> The relative  
25 advantages of different RD technologies used in included trials (e.g. 'cooled'<sup>25,26,32</sup>  
26 and 'bipolar'<sup>30,32</sup> RD) remains to be established. Due to the small number of studies  
27 at each time point, sub-group analysis was not considered appropriate. However, the  
28 publication of more sham-controlled trials and trials comparing different RD  
29 technologies may make this type of investigation possible. Technical advances and  
30 advances in knowledge and experience may allow for better selection of anatomical  
31 targets and patients for RD and hence improve clinical outcomes: it is important that  
32 these developments are formally assessed and published.  
33  
34  
35  
36  
37  
38  
39  
40  
41  
42  
43  
44  
45  
46  
47

48 In conclusion, within the limitations in this review and the published literature, there  
49 appears to be at least short-term benefit from RD of selected lumbosacral  
50 anatomical targets for chronic back pain. However, the mean size of effect appears  
51 to be small and, overall, clinical significance may be marginal. Hence, chronic back  
52 pain remains a highly challenging condition to treat.  
53  
54  
55  
56  
57  
58  
59  
60

1  
2  
3  
4  
5  
6 **Acknowledgements** Thanks to Julie Aikens and Kerry Herbert at Hinchingsbrooke  
7  
8 Healthcare Library for their assistance in designing and running the search strategies  
9  
10 for the review.  
11  
12

13 **Contributors:** MC contributed to the planning of this work, selected articles for  
14  
15 inclusion, extracted data, quality assessed studies and drafted and re-drafted the  
16  
17 manuscript. RL contributed to the planning of this work, reviewed the manuscript and  
18  
19 approved the final version. PT extracted data from the trials, reviewed the  
20  
21 manuscript and approved the final version. MA contributed to the planning of this  
22  
23 work, reviewed the manuscript and approved the final version. ML contributed to the  
24  
25 planning of this work, reviewed the manuscript and approved the final version.  
26  
27  
28  
29

30 **Funding** This research received no specific grant from any funding agency in the  
31  
32 public, commercial or not-for-profit sectors. RL is supported by the Medical Research  
33  
34 Council (MC\_UU\_12015/2). MCL is supported by AABGI Foundation project grant  
35  
36 (RCZB/071).  
37  
38  
39

40 **Competing interests** None declared.  
41

42 **Patient consent for publication** Not required.  
43  
44

45 **Provenance and peer review** Not commissioned; externally peer reviewed.  
46  
47

48 **Data availability statement** All data relevant to the study are included in the article  
49  
50 or uploaded as supplementary information.  
51  
52

53 **Patient and Public Involvement** This research was done without patient  
54  
55 involvement.  
56  
57  
58  
59  
60



**Open access** This is an open access article distributed in accordance with the Creative Commons Attribution Non Commercial (CC BY-NC 4.0) license, which permits others to distribute, remix, adapt, build upon this work non-commercially, and license their derivative works on different terms, provided the original work is properly cited, appropriate credit is given, any changes made indicated, and the use is non-commercial. See: <http://creativecommons.org/licenses/by-nc/4.0/>.

## References

- 1 Hartvigsen J, Hancock MJ, Kongsted A, *et al*. What low back pain is and why we need to pay attention. *Lancet* 2018;**391**:2356–67. doi:10.1016/S0140-6736(18)30480-X
- 2 Hoy D, Bain C, Williams G, *et al*. A systematic review of the global prevalence of low back pain. *Arthritis Rheum* 2012;**64**:2028–37. doi:10.1002/art.34347
- 3 Maniadakis N, Gray A. The economic burden of back pain in the UK. *Pain* 2000;**84**:95–103. doi:10.1016/S0304-3959(99)00187-6
- 4 Dagenais S, Caro J, Haldeman S. A systematic review of low back pain cost of illness studies in the United States and internationally. *Spine J* 2008;**8**:8–20. doi:10.1016/j.spinee.2007.10.005
- 5 National Institute of Health and Care Excellence. Low back pain and sciatica in over 16s: assessment and management. 2016.
- 6 Chou R, Baisden J, Carragee EJ, *et al*. Surgery for Low Back Pain: A Review of the Evidence for an American Pain Society Clinical Practice Guideline. *Spine (Phila Pa 1976)* 2009;**34**:1094–109.
- 7 Chou R, Loeser JD, Owens DK, *et al*. Interventional Therapies, Surgery, and Interdisciplinary Rehabilitation for Low Back Pain: An Evidence-Based Clinical

- 1  
2  
3 Practice Guideline From the American Pain Society. *Spine (Phila Pa 1976)*  
4  
5 2009;**34**:1066–77. doi:10.1097/BRS.0b013e3181a1390d  
6  
7
- 8 8 Kline M. Radiofrequency techniques in clinical practice. In: *Waldman SD,*  
9  
10 *Winnie AP, eds. Interventional Pain Management. Philadelphia, PA: Saunders.*  
11  
12 1996.  
13  
14
- 15 9 Wray JK, Dixon B, Przkora R. *Radiofrequency Ablation*. 2019.  
16  
17
- 18 10 Manchikanti L, Hirsch J, Pampati V, *et al*. Utilization of Facet Joint and  
19  
20 Sacroiliac Joint Interventions in Medicare Population from 2000 to 2014:  
21  
22 Explosive Growth Continues! *Curr Pain Headache Rep* 2016;**20**:58.  
23  
24  
25
- 26 11 Maas E, Ostelo R, Niemisto L, *et al*. Radiofrequency denervation for chronic  
27  
28 low back pain. *Cochrane Database Syst Rev* 2015;:Art. No.: CD008572.  
29  
30 doi:10.1001/jama.2017.16386  
31  
32
- 33 12 Brandon R, Cohen D, Edward T, *et al*. Pulsed Radiofrequency  
34  
35 Neuromodulation in Interventional Pain Management—A Growing Technology.  
36  
37 *J Radiol Nurs* 2018;**37**:181–7.  
38  
39
- 40 13 Schünemann H, Brožek J, Guyatt G, *et al.*, editors. *GRADE Handbook:*  
41  
42 *Handbook for grading the quality of evidence and the strength of*  
43  
44 *recommendations using the GRADE approach*.  
45  
46  
47
- 48 14 Higgins JP, Savovic J, Page MJ, *et al.*, editors. *Revised Cochrane risk-of-bias*  
49  
50 *tool for randomized trials (RoB 2)*. 2019.  
51  
52
- 53 15 Juch JNS, Maas ET, Ostelo RWJG, *et al*. Effect of Radiofrequency  
54  
55 Denervation on Pain Intensity Among Patients With Chronic Low Back Pain.  
56  
57 *JAMA* 2017;**318**:68–81.  
58  
59  
60

- 1  
2  
3 16 Review Manager (RevMan) [Computer program]. Version 5.3. Copenhagen:  
4 The Nordic Cochrane Centre, The Cochrane Collaboration, 2014.  
5  
6  
7  
8 17 Gallagher J, Petriccione di Vadi P, Wedley J, *et al*. Radiofrequency facet joint  
9 denervation in the treatment of low back pain: a prospective controlled double-  
10 blind study to assess its efficacy. *Pain Clin* 1994;**7**:193–8.  
11  
12  
13  
14  
15 18 Leclaire R, Fortin L, Lambert R, *et al*. Radiofrequency Facet Joint Denervation  
16 in the Treatment of Low Back Pain: A Placebo-Controlled Clinical Trial to  
17 Assess Efficacy. *Spine (Phila Pa 1976)* 2001;**26**:1411–6.  
18  
19  
20  
21  
22  
23  
24  
25  
26 19 Moussa WMM, Khedr W. Percutaneous radiofrequency facet capsule  
27 denervation as an alternative target in lumbar facet syndrome. *Clin Neurol*  
28  
29  
30  
31  
32  
33 20 van Kleef M, Barendse GAM, Kessels A, *et al*. Randomised trial of  
34 radiofrequency lumbar facet denervation for chronic low back pain. *Spine*  
35  
36  
37  
38  
39  
40 21 Van Tilburg CWJ, Schuurmans FA, Stronks DL, *et al*. Randomized sham-  
41 controlled double-blind multicenter clinical trial to ascertain the effect of  
42 percutaneous radiofrequency treatment for sacroiliac joint pain: Three-month  
43 results. *Clin J Pain* 2016;**32**:921–6. doi:10.1097/AJP.0000000000000351  
44  
45  
46  
47  
48  
49  
50 22 Van Wijk RMAW, Geurts JWM, Wynne HJ, *et al*. Radiofrequency denervation  
51 of lumbar facet joints in the treatment of chronic low back pain: A randomized,  
52 double-blind, sham lesion-controlled trial. *Clin J Pain* 2005;**21**:335–44.  
53  
54  
55  
56  
57 23 Nath S, Nath CA, Pettersson K. Percutaneous Lumbar Zygapophysial (Facet)  
58 Joint Neurotomy Using Radiofrequency Current, in the Management of  
59  
60

- 1  
2  
3 Chronic Low Back Pain. *Spine (Phila Pa 1976)* 2008;**33**:1291–1297.  
4  
5 doi:10.1109/ICCGI.2010.42  
6  
7
- 8 24 Tekin I, Mirzai H, Ok G, *et al.* A comparison of conventional and pulsed  
9 radiofrequency denervation in the treatment of chronic facet joint pain. *Clin J*  
10 *Pain* 2007;**23**:524–9. doi:10.1097/AJP.0b013e318074c99c  
11  
12  
13  
14  
15 25 Cohen SP, Hurley RW, Buckenmaier CC, *et al.* Randomized Placebo-  
16 Controlled Study Evaluating Lateral Branch Radiofrequency Denervation for  
17 Sacroiliac Joint Pain. *Anesthesiology* 2008;**109**:279–88.  
18  
19  
20  
21  
22  
23  
24  
25  
26 26 Patel N, Gross A, Brown L, *et al.* A Randomized, Placebo-Controlled Study to  
27 Assess the Efficacy of Lateral Branch Neurotomy for Chronic Sacroiliac Joint  
28 Pain. *Pain Med* 2012;**13**:383–98. doi:10.1111/j.1526-4637.2012.01328.x  
29  
30  
31  
32  
33 27 Van Tilburg C, Stronks D, Groeneweg J, *et al.* Randomised sham-controlled  
34 double-blind multicentre clinical trial to ascertain the effect of percutaneous  
35 radiofrequency treatment for lumbar facet joint pain. *Spine (Phila Pa 1976)*  
36  
37  
38  
39  
40  
41  
42  
43 28 Mehta V, Poply K, Husband M, *et al.* The Effects of Radiofrequency  
44 Neurotomy Using a Strip-Lesioning Device on Patients with Sacroiliac Joint  
45 Pain: Results from a Single-Center, Randomized, Sham-Controlled Trial. *Pain*  
46 *Physician* 2018;**21**:607–18.  
47  
48  
49  
50  
51  
52  
53 29 Barendse GAM, van den Berg SGM, Kessels AHF, *et al.* Randomized  
54 Controlled Trial of Percutaneous Intradiscal Radiofrequency  
55 Thermocoagulation for Chronic Discogenic Back Pain. Lack of Effect From a  
56  
57  
58  
59  
60

- 1  
2  
3 doi:10.1097/00007632-200102010-00014  
4  
5  
6 30 Kapural L, Vrooman B, Sarwar S, *et al.* A Randomized, Placebo-Controlled  
7  
8 Trial of Transdiscal Radiofrequency, Biacuplasty for Treatment of Discogenic  
9  
10 Lower Back Pain. *Pain Med* 2013;**14**:362–73. doi:10.1111/pme.12023  
11  
12  
13 31 van Tilburg CWJ, Stronks DL, Groeneweg JG, *et al.* Randomized sham-  
14  
15 controlled, double-blind, multicenter clinical trial on the effect of percutaneous  
16  
17 radiofrequency at the ramus communicans for lumbar disc pain. *Eur J Pain*  
18  
19 2017;**21**:520–9. doi:10.1002/ejp.945  
20  
21  
22  
23 32 Desai MJ, Kapural L, Petersohn JD, *et al.* A prospective, randomized,  
24  
25 multicenter, open-label clinical trial comparing intradiscal biacuplasty to  
26  
27 conventional medical management for discogenic lumbar back pain. *Spine*  
28  
29 (*Phila Pa 1976*) 2016;**41**:1065–74. doi:10.1097/BRS.0000000000001412  
30  
31  
32  
33 33 Kvarstein G, Måwe L, Indahl A, *et al.* A randomized double-blind controlled trial  
34  
35 of intra-annular radiofrequency thermal disc therapy - A 12-month follow-up.  
36  
37 *Pain* 2009;**145**:279–86. doi:10.1016/j.pain.2009.05.001  
38  
39  
40  
41 34 Fischgrund JS, Rhyne A, Franke J, *et al.* Intraosseous basivertebral nerve  
42  
43 ablation for the treatment of chronic low back pain: a prospective randomized  
44  
45 double-blind sham-controlled multi-center study. *Eur Spine J* 2018;**27**:1146–  
46  
47 56. doi:10.1007/s00586-018-5496-1  
48  
49  
50 35 The Cochrane Collaboration. Introduction to sources of bias in clinical trials. In:  
51  
52 *Cochrane Handbook for Systematic Reviews of Interventions*. 2011.  
53  
54  
55 36 Morley S, Williams A, Hussain S. Estimating the clinical effectiveness of  
56  
57 cognitive behavioural therapy in the clinic: Evaluation of a CBT informed pain  
58  
59 management programme. *Pain* 2008;**137**:670–80.  
60

- 1  
2  
3 37 Dunn K, Croft P. Epidemiology and natural history of low back pain. *Eura*  
4  
5 *Medicophys* 2004;**40**:9–13.  
6  
7  
8 38 Dunn K, Jordan K, Croft P. Characterizing the course of low back pain: a latent  
9  
10 class analysis. *Am J Epidemiol* 2006;**63**:754–61.  
11  
12  
13 39 Dreyfuss P, Baker R. Comment on: Radiofrequency facet joint denervation in  
14  
15 the treatment of low back pain: a placebo-controlled clinical trial to assess  
16  
17 efficacy. *Spine (Phila Pa 1976)* 2002;**27**:556–7.  
18  
19  
20 40 Kapural L, Provenzano D, Narouze S. RE: Juch JNS, et al. Effect of  
21  
22 Radiofrequency Denervation on Pain Intensity Among Patients With Chronic  
23  
24 Low Back Pain: The Mint Randomized Clinical Trials. *JAMA* 2017;**318**(1):68–  
25  
26 81. *Neuromodulation* 2017;**20**:844. doi:10.1111/ner.12729  
27  
28  
29 41 Cohen SP, Julie JH, Brummett C. Facet joint pain-advances in patient  
30  
31 selection and treatment. *Nat Rev Rheumatol* 2013;**9**:101–16.  
32  
33  
34  
35  
36  
37  
38  
39  
40  
41  
42  
43  
44  
45  
46  
47  
48  
49  
50  
51  
52  
53  
54  
55  
56  
57  
58  
59  
60

**Table 1** Results of the meta-analyses of randomised controlled trials

|                                              | All trials |     |                         |                |          | Sham controlled trials |     |                         |                |          |
|----------------------------------------------|------------|-----|-------------------------|----------------|----------|------------------------|-----|-------------------------|----------------|----------|
|                                              | k          | N   | MD (95% CI)             | I <sup>2</sup> | GRADE*   | k                      | N   | MD (95% CI)             | I <sup>2</sup> | GRADE*   |
| <b>RD of the facet joints</b>                |            |     |                         |                |          |                        |     |                         |                |          |
| <b>1-3 months</b>                            | 7          | 599 | -0.56<br>(-1.13, 0.01)  | 59%            | Low      | 6                      | 348 | -0.63<br>(-1.39, 0.12)  | 66%            | Low      |
| <b>6 months</b>                              | 4          | 361 | -0.66<br>(-1.37, 0.05)  | 42%            | Low      | 3                      | 110 | -1.05<br>(-2.21, 0.10)  | 32%            | Low      |
| <b>1 year</b>                                | 2          | 291 | -0.72<br>(-2.24, 0.80)  | 89%            | Very low | 1                      | 40  | -1.50<br>(-2.21, -0.79) | NA             | Very low |
| <b>RD of the sacroiliac joints</b>           |            |     |                         |                |          |                        |     |                         |                |          |
| <b>1-3 months</b>                            | 5          | 384 | -1.53<br>(-2.62, -0.45) | 83%            | Low      | 4                      | 156 | -1.89<br>(-3.45, -0.34) | 87%            | Very low |
| <b>6 months</b>                              | 1          | 228 | -0.28<br>(-1.00, 0.44)  | NA             | Low      |                        |     |                         |                |          |
| <b>12 months</b>                             | 1          | 228 | -0.19<br>(-0.92, 0.54)  | NA             | Low      |                        |     |                         |                |          |
| <b>RD of the intervertebrae discs</b>        |            |     |                         |                |          |                        |     |                         |                |          |
| <b>1-3 months</b>                            | 4          | 200 | -0.98<br>(-1.84, -0.12) | 40%            | Low      | 3                      | 144 | -0.63<br>(-1.36, 0.10)  | 0%             | Low      |
| <b>6 months</b>                              | 3          | 127 | -1.74<br>(-2.58, -0.91) | 0%             | Low      | 2                      | 75  | -1.63<br>(-2.58, -0.68) | 0%             | Low      |
| <b>12 months</b>                             | 1          | 20  | -1.70<br>(-3.63, 0.23)  | NA             | Very low | 1                      | 20  | -1.70<br>(-3.63, 0.23)  | NA             | Very low |
| <b>RD of the vertebrae body and endplate</b> |            |     |                         |                |          |                        |     |                         |                |          |
| <b>3 months</b>                              | 1          | 205 | -0.34<br>(-1.09, 0.41)  | NA             | Moderate | 1                      | 205 | -0.34<br>(-1.09, 0.41)  | NA             | Moderate |
| <b>6 months</b>                              | 1          | 205 | -0.67<br>(-1.44, 0.10)  | NA             | Moderate | 1                      | 205 | -0.67<br>(-1.44, 0.10)  | NA             | Moderate |
| <b>12 months</b>                             | 1          | 205 | -0.50<br>(-1.29, 0.29)  | NA             | Moderate | 1                      | 205 | -0.50<br>(-1.29, 0.29)  | NA             | Moderate |

k, number of trials; N, number of participants; MD, Mean difference.

\*GRADE assessment of the quality of the evidence

**Figure 1** PRISMA flow diagram

**Figure 2** Post treatment pain score for radiofrequency denervation of the facet joints versus control at 1-3 month follow-up (longest time point used for studies with multiple time points)

**Figure 3** Post treatment pain score for radiofrequency denervation of the sacroiliac joints versus control at 1-3 month follow-up (longest time point used for studies with multiple time points)

**Figure 4** Post treatment pain score for radiofrequency denervation of the intervertebral discs versus control at 1-3 month follow-up (longest time point used for studies with multiple time points)

1  
2  
3  
4  
5  
6  
7  
8  
9  
10  
11  
12  
13  
14  
15  
16  
17  
18  
19  
20  
21  
22  
23  
24  
25  
26  
27  
28  
29  
30  
31  
32  
33  
34  
35  
36  
37  
38  
39  
40  
41  
42  
43  
44  
45  
46  
47  
48  
49  
50  
51  
52  
53  
54  
55  
56  
57  
58  
59  
60

For peer review only



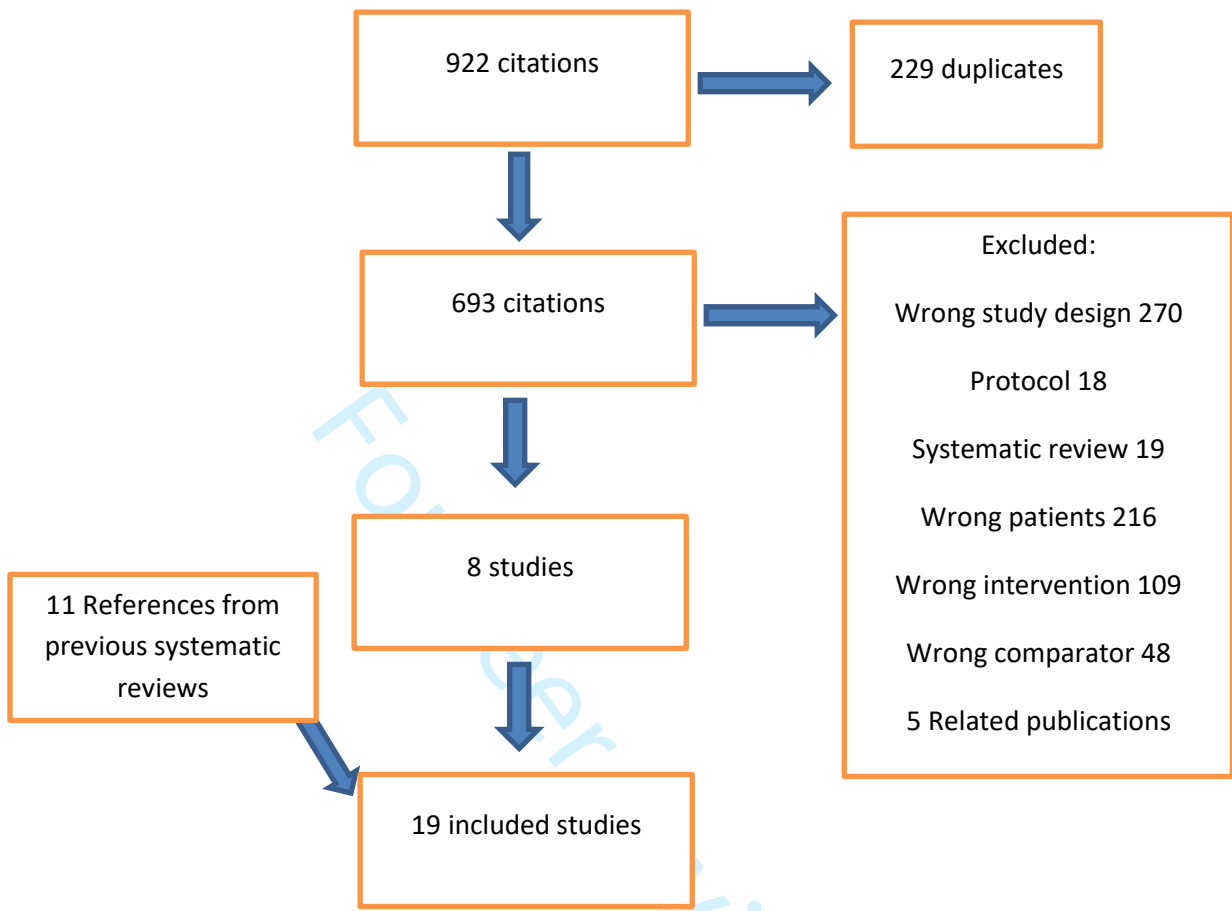

1  
2  
3  
4  
5  
6  
7  
8  
9  
10  
11  
12  
13  
14  
15  
16  
17  
18  
19  
20  
21  
22  
23  
24  
25  
26  
27  
28  
29  
30  
31  
32  
33  
34  
35  
36  
37  
38  
39  
40  
41  
42  
43  
44  
45  
46  
47  
48  
49  
50  
51  
52  
53  
54  
55  
56  
57  
58  
59  
60

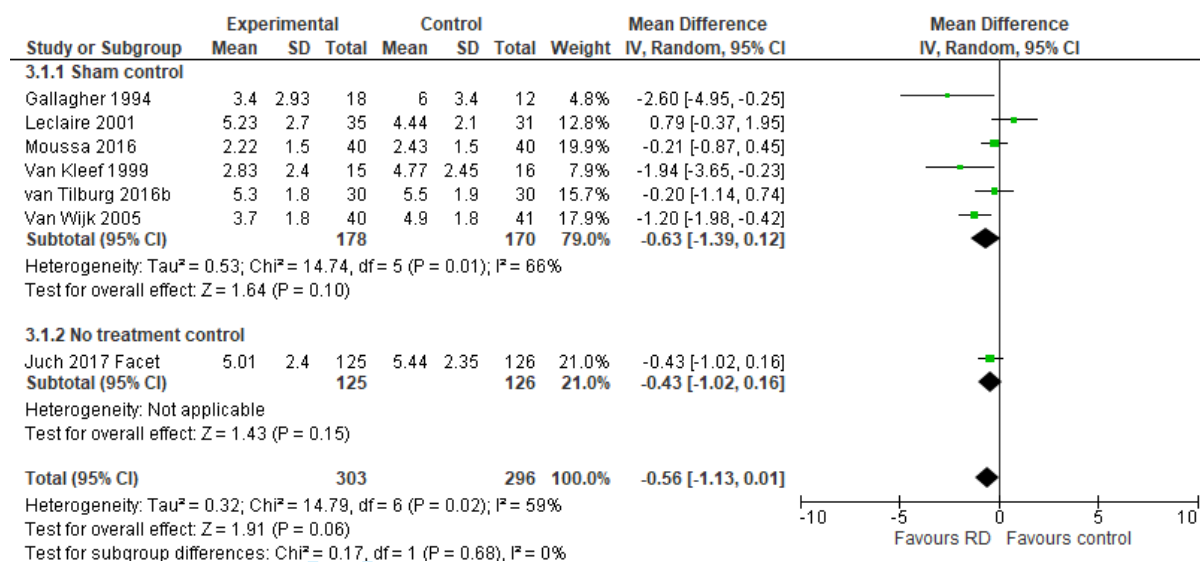

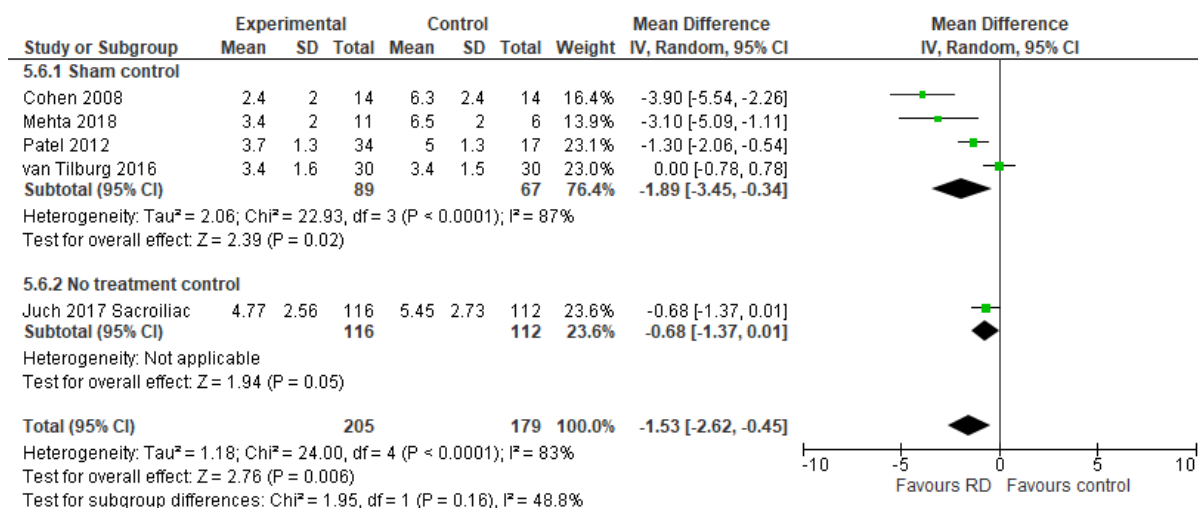

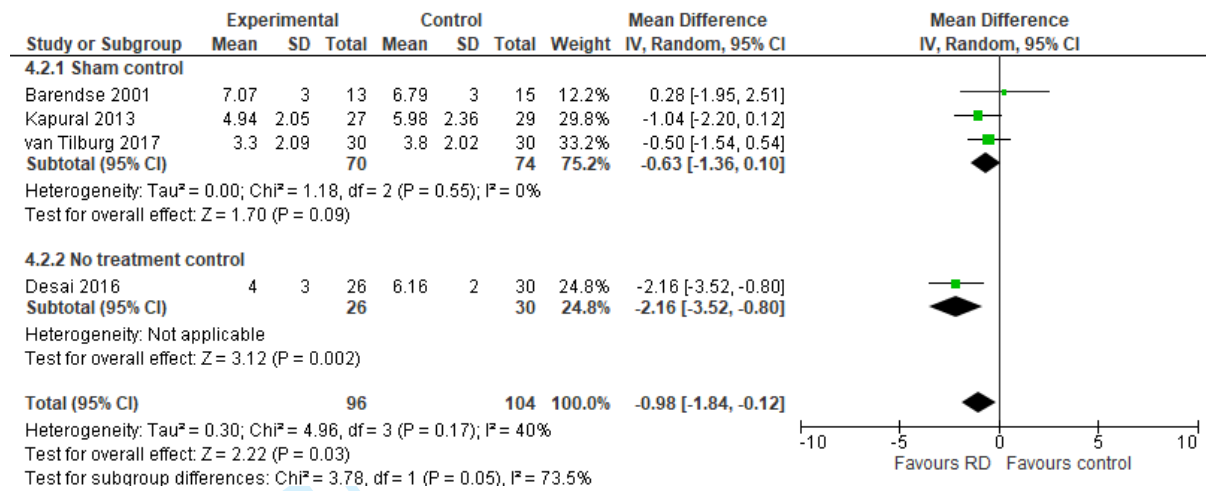

## Appendix 1 Search strategies

### Medline and Embase

| #  | Database | Search term                            |
|----|----------|----------------------------------------|
| 1  | Medline  | (randomized controlled trial).pt       |
| 2  | Medline  | (controlled clinical trial).pt         |
| 3  | Medline  | (randomi*ed).ab                        |
| 4  | Medline  | (placebo).ti,ab                        |
| 5  | Medline  | (drug therapy).fs                      |
| 6  | Medline  | (randomly).ti,ab                       |
| 7  | Medline  | (trial).ti,ab                          |
| 8  | Medline  | (groups).ti,ab                         |
| 9  | Medline  | (1 OR 2 OR 3 OR 4 OR 5 OR 6 OR 7 OR 8) |
| 10 | Medline  | (animals NOT (humans AND animals)).su  |
| 11 | Medline  | 9 not 10                               |
| 12 | Medline  | (dorsalgia).ti,ab                      |
| 13 | Medline  | exp "BACK PAIN"/                       |
| 14 | Medline  | (backache).ti,ab                       |
| 15 | Medline  | (lumbar ADJ pain).ti,ab                |
| 16 | Medline  | (coccyx).ti,ab                         |
| 17 | Medline  | (coccydynia).ti,ab                     |
| 18 | Medline  | (sciatica).ti,ab                       |
| 19 | Medline  | "SCIATIC NEUROPATHY"/                  |

|    |    |         |                                                     |
|----|----|---------|-----------------------------------------------------|
| 1  |    |         |                                                     |
| 2  |    |         |                                                     |
| 3  | 20 | Medline | (spondylosis).ti,ab                                 |
| 4  |    |         |                                                     |
| 5  | 21 | Medline | (lumbago).ti,ab                                     |
| 6  |    |         |                                                     |
| 7  |    |         |                                                     |
| 8  | 22 | Medline | (12 OR 13 OR 14 OR 15 OR 16 OR 17 OR 18 OR 19 OR 20 |
| 9  |    |         | OR 21)                                              |
| 10 |    |         |                                                     |
| 11 | 23 | Medline | exp SPINE/                                          |
| 12 |    |         |                                                     |
| 13 |    |         |                                                     |
| 14 | 24 | Medline | (discitis).ti,ab                                    |
| 15 |    |         |                                                     |
| 16 |    |         |                                                     |
| 17 | 25 | Medline | exp "SPINAL DISEASES"/                              |
| 18 |    |         |                                                     |
| 19 | 26 | Medline | (disc ADJ degeneration).ti,ab                       |
| 20 |    |         |                                                     |
| 21 |    |         |                                                     |
| 22 | 27 | Medline | (disc ADJ prolapse).ti,ab                           |
| 23 |    |         |                                                     |
| 24 |    |         |                                                     |
| 25 | 28 | Medline | (disc ADJ herniation).ti,ab                         |
| 26 |    |         |                                                     |
| 27 | 29 | Medline | (spinal fusion).su                                  |
| 28 |    |         |                                                     |
| 29 |    |         |                                                     |
| 30 | 30 | Medline | (facet ADJ joints).ti,ab                            |
| 31 |    |         |                                                     |
| 32 |    |         |                                                     |
| 33 | 31 | Medline | (intervertebral disc).su                            |
| 34 |    |         |                                                     |
| 35 | 32 | Medline | (postlaminectomy).ti,ab                             |
| 36 |    |         |                                                     |
| 37 |    |         |                                                     |
| 38 | 33 | Medline | (arachnoiditis).ti,ab                               |
| 39 |    |         |                                                     |
| 40 |    |         |                                                     |
| 41 | 34 | Medline | (failed ADJ back).ti,ab                             |
| 42 |    |         |                                                     |
| 43 | 35 | Medline | (23 OR 24 OR 25 OR 26 OR 27 OR 28 OR 29 OR 30 OR 31 |
| 44 |    |         | OR 32 OR 33 OR 34)                                  |
| 45 |    |         |                                                     |
| 46 | 36 | Medline | (22 OR 35)                                          |
| 47 |    |         |                                                     |
| 48 |    |         |                                                     |
| 49 | 37 | Medline | exp "RADIO WAVES"/                                  |
| 50 |    |         |                                                     |
| 51 |    |         |                                                     |
| 52 | 38 | Medline | exp "PULSED RADIOFREQUENCY TREATMENT"/              |
| 53 |    |         |                                                     |
| 54 | 39 | Medline | (radiofrequency).af                                 |
| 55 |    |         |                                                     |
| 56 |    |         |                                                     |
| 57 | 40 | Medline | (radio frequency).af                                |
| 58 |    |         |                                                     |
| 59 |    |         |                                                     |
| 60 |    |         |                                                     |

- 1  
2  
3 41 Medline exp ELECTROCOAGULATION/  
4  
5  
6 42 Medline (electrocoag\*).af  
7  
8 43 Medline (thermocoag\*).af  
9  
10  
11 44 Medline neurotom\* OR (neuroly\*).af  
12  
13 45 Medline (37 OR 38 OR 39 OR 40 OR 41 OR 42 OR 43 OR 44)  
14  
15  
16 46 Medline (11 AND 36 AND 45)  
17  
18 47 EMBASE "CLINICAL TRIAL"/  
19  
20  
21 48 EMBASE "CONTROLLED CLINICAL TRIAL"/  
22  
23  
24 49 EMBASE "CONTROLLED STUDY"/  
25  
26  
27 50 EMBASE "RANDOMIZED CONTROLLED TRIAL"/  
28  
29  
30 51 EMBASE "DOUBLE BLIND PROCEDURE"/  
31  
32  
33 52 EMBASE "SINGLE BLIND PROCEDURE"/  
34  
35  
36 53 EMBASE "CROSSOVER PROCEDURE"/  
37  
38  
39 54 EMBASE PLACEBO/  
40  
41 55 EMBASE (allocat\*).ti,ab  
42  
43 56 EMBASE (assign\*).ti,ab  
44  
45 57 EMBASE (blind\*).ti,ab  
46  
47 58 EMBASE (clinic\* ADJ25 (study OR trial)).ti,ab  
48  
49  
50 59 EMBASE (crossover OR cross-over).ti,ab  
51  
52  
53 60 EMBASE (factorial\*).ti,ab  
54  
55  
56 61 EMBASE (followup OR follow-up).ti,ab  
57  
58 62 EMBASE (prospectiv\*).ti,ab  
59  
60

1  
2  
3  
4  
5  
6  
7  
8  
9  
10  
11  
12  
13  
14  
15  
16  
17  
18  
19  
20  
21  
22  
23  
24  
25  
26  
27  
28  
29  
30  
31  
32  
33  
34  
35  
36  
37  
38  
39  
40  
41  
42  
43  
44  
45  
46  
47  
48  
49  
50  
51  
52  
53  
54  
55  
56  
57  
58  
59  
60

- 63 EMBASE (placebo\*).ti,ab
- 64 EMBASE (random\*).ti,ab
- 65 EMBASE ((singl\* OR doubl\* OR trebl\* OR trip\*) ADJ25 (blind\* OR mask\*)).ti,ab
- 66 EMBASE (volunteer\*).ti,ab
- 67 EMBASE (47 OR 48 OR 49 OR 50 OR 51 OR 52 OR 53 OR 54 OR 55 OR 56 OR 57 OR 58 OR 59 OR 60 OR 61 OR 62 OR 63 OR 64 OR 65 OR 66)
- 68 EMBASE exp animals/ or exp invertebrate/ or animal experiment/ or animal model/ or animal tissue/ or animal cell/ or nonhuman/
- 69 EMBASE exp ANIMALS/
- 70 EMBASE exp INVERTEBRATE/
- 71 EMBASE ANIMAL EXPERIMENT/
- 72 EMBASE ANIMAL MODEL/
- 73 EMBASE ANIMAL TISSUE/
- 74 EMBASE ANIMAL CELL/
- 75 EMBASE NONHUMAN/
- 76 EMBASE 71 or 72 or 73 or 74 or 75
- 77 EMBASE exp ANIMALS/
- 78 EMBASE exp INVERTEBRATE/
- 79 EMBASE (76 OR 77 OR 78)
- 80 EMBASE 77 or 78
- 81 EMBASE HUMAN/ OR NORMAL HUMAN/ OR HUMAN CELL/
- 82 EMBASE (76 AND 77 AND 78 AND 81)



- 1  
2  
3 83 EMBASE (dorsalgia).ti,ab  
4  
5  
6 84 EMBASE (back pain).ti,ab  
7  
8 85 EMBASE exp BACKACHE/  
9  
10  
11 86 EMBASE (lumbar ADJ pain).ti,ab  
12  
13  
14 87 EMBASE (coccyx).ti,ab  
15  
16 88 EMBASE (coccydynia).ti,ab  
17  
18  
19 89 EMBASE (sciatica).ti,ab  
20  
21 90 EMBASE ISCHIALGIA/  
22  
23  
24 91 EMBASE (spondylosis).ti,ab  
25  
26 92 EMBASE (lumbago).ti,ab  
27  
28  
29 93 EMBASE (back disorder\*).ti,ab  
30  
31  
32 94 EMBASE (83 OR 84 OR 85 OR 86 OR 87 OR 88 OR 89 OR 90 OR 91  
33 OR 92 OR 93)  
34  
35 95 EMBASE exp SPINE/  
36  
37  
38 96 EMBASE (discitis OR diskitis).ti,ab  
39  
40  
41 97 EMBASE exp "SPINE DISEASE"/  
42  
43 98 EMBASE (disc ADJ degeneration).ti,ab  
44  
45  
46 99 EMBASE (disc ADJ prolapse).ti,ab  
47  
48  
49 100 EMBASE (disc ADJ herniation).ti,ab  
50  
51 101 EMBASE (spinal fusion).ti,ab  
52  
53 102 EMBASE (facet ADJ joints).ti,ab  
54  
55  
56 103 EMBASE (intervertebral disk OR Intervertebral disc).ti,ab  
57  
58  
59 104 EMBASE (postlaminectomy).ti,ab  
60

|    |     |                                                            |
|----|-----|------------------------------------------------------------|
| 1  |     |                                                            |
| 2  |     |                                                            |
| 3  | 105 | EMBASE (arachnoiditis).ti,ab                               |
| 4  |     |                                                            |
| 5  | 106 | EMBASE (failed ADJ back).ti,ab                             |
| 6  |     |                                                            |
| 7  |     |                                                            |
| 8  | 107 | EMBASE (95 OR 96 OR 97 OR 98 OR 99 OR 100 OR 101 OR 102 OR |
| 9  |     | 103 OR 104 OR 105 OR 106)                                  |
| 10 |     |                                                            |
| 11 | 108 | EMBASE 94 or 107                                           |
| 12 |     |                                                            |
| 13 |     |                                                            |
| 14 | 109 | EMBASE exp PULSED RADIOFREQUENCY TREATMENT/                |
| 15 |     |                                                            |
| 16 |     |                                                            |
| 17 | 110 | EMBASE exp RADIOFREQUENCY/                                 |
| 18 |     |                                                            |
| 19 | 111 | EMBASE exp RADIOFREQUENCY RADIATION/                       |
| 20 |     |                                                            |
| 21 |     |                                                            |
| 22 | 112 | EMBASE (radiofrequency OR radio-frequency).ti,ab           |
| 23 |     |                                                            |
| 24 |     |                                                            |
| 25 | 113 | EMBASE exp THERMOCOAGULATION/ OR thermocoag*               |
| 26 |     |                                                            |
| 27 | 114 | EMBASE exp ELECTROCOAGULATION/ OR electrocoag*             |
| 28 |     |                                                            |
| 29 |     |                                                            |
| 30 | 115 | EMBASE (neurotom* OR neuroly*).ti,ab                       |
| 31 |     |                                                            |
| 32 | 116 | EMBASE (109 OR 110 OR 111 OR 112 OR 113 OR 114 OR 115)     |
| 33 |     |                                                            |
| 34 |     |                                                            |
| 35 | 117 | EMBASE (108 AND 116)                                       |
| 36 |     |                                                            |
| 37 |     |                                                            |
| 38 | 118 | Medline 46 [DT 2014-2019]                                  |
| 39 |     |                                                            |
| 40 |     |                                                            |
| 41 |     |                                                            |

### Medline in process

| #  | Database | Search term                                   |
|----|----------|-----------------------------------------------|
| 44 |          |                                               |
| 45 |          |                                               |
| 46 |          |                                               |
| 47 | 1        | Medline ("randomi*ed controlled trial").ti,ab |
| 48 |          |                                               |
| 49 | 2        | Medline ("controlled clinical trial").ti,ab   |
| 50 |          |                                               |
| 51 |          |                                               |
| 52 | 3        | Medline ("randomi*ed").ab                     |
| 53 |          |                                               |
| 54 | 4        | Medline (placebo).ti,ab                       |
| 55 |          |                                               |
| 56 |          |                                               |
| 57 | 5        | Medline ("drug therapy").fs                   |
| 58 |          |                                               |
| 59 |          |                                               |
| 60 |          |                                               |

- 1  
2  
3 6 Medline (randomly).ti,ab  
4  
5  
6 7 Medline (trial).ti,ab  
7  
8 8 Medline (groups).ti,ab  
9  
10  
11 9 Medline (1 OR 2 OR 3 OR 4 OR 5 OR 6 OR 7 OR 8)  
12  
13 10 Medline (dorsalgia).ti,ab  
14  
15  
16 11 Medline ("back pain").ti,ab  
17  
18  
19 12 Medline (backache).ti,ab  
20  
21 13 Medline ("lumber pain").ti,ab  
22  
23  
24 14 Medline (coccyx).ti,ab  
25  
26 15 Medline (coccydynia).ti,ab  
27  
28  
29 16 Medline (sciatica\*).ti,ab  
30  
31  
32 17 Medline (spondylosis).ti,ab  
33  
34 18 Medline (lumbago).ti,ab  
35  
36  
37 19 Medline (10 OR 11 OR 12 OR 13 OR 14 OR 15 OR 16 OR 17  
38 OR 18)  
39  
40 20 Medline (spine OR sacrum OR "lumber vertebrae" OR  
41 "intervertebral disc\*").ti,ab  
42  
43  
44 21 Medline (discitis).ti,ab  
45  
46  
47 22 Medline ("disc degeneration").ti,ab  
48  
49 23 Medline ("disc prolapse").ti,ab  
50  
51  
52 24 Medline ("disc herniation").ti,ab  
53  
54 25 Medline ("spinal fusion").ti,ab  
55  
56  
57 26 Medline ("facet joints").ti,ab  
58  
59  
60

|    |    |                                                          |
|----|----|----------------------------------------------------------|
| 1  |    |                                                          |
| 2  |    |                                                          |
| 3  | 27 | Medline (postlaminectomy).ti,ab                          |
| 4  |    |                                                          |
| 5  | 28 | Medline (arachnoiditis).ti,ab                            |
| 6  |    |                                                          |
| 7  |    |                                                          |
| 8  | 29 | Medline ("failed back").ti,ab                            |
| 9  |    |                                                          |
| 10 |    |                                                          |
| 11 | 30 | Medline (20 OR 21 OR 22 OR 23 OR 24 OR 25 OR 26 OR 27    |
| 12 |    | OR 28 OR 29)                                             |
| 13 |    |                                                          |
| 14 | 31 | Medline (19 OR 30)                                       |
| 15 |    |                                                          |
| 16 |    |                                                          |
| 17 | 32 | Medline (radiowave* OR "radio wave*").ti,ab              |
| 18 |    |                                                          |
| 19 |    |                                                          |
| 20 | 33 | Medline (radiofrequency OR "radio frequency").ti,ab      |
| 21 |    |                                                          |
| 22 | 34 | Medline (electrocoag*).ti,ab                             |
| 23 |    |                                                          |
| 24 |    |                                                          |
| 25 | 35 | Medline (thermocoag*).ti,ab                              |
| 26 |    |                                                          |
| 27 |    |                                                          |
| 28 | 36 | Medline (neurotom* OR neuroloy*).ti,ab                   |
| 29 |    |                                                          |
| 30 | 37 | Medline (32 OR 33 OR 34 OR 35 OR 36)                     |
| 31 |    |                                                          |
| 32 |    |                                                          |
| 33 | 38 | Medline (9 AND 31 AND 37)                                |
| 34 |    |                                                          |
| 35 | 39 | Medline 38 [Document status In Data Review OR In Process |
| 36 |    | OR PubMed not MEDLINE OR Publisher]                      |
| 37 |    |                                                          |
| 38 |    |                                                          |
| 39 |    |                                                          |

## Cinahl

| #  | Database | Search term                                   |
|----|----------|-----------------------------------------------|
| 41 |          |                                               |
| 42 |          |                                               |
| 43 |          |                                               |
| 44 |          |                                               |
| 45 | 1        | CINAHL exp "CLINICAL TRIALS"/                 |
| 46 |          |                                               |
| 47 |          |                                               |
| 48 | 2        | CINAHL ("randomi*ed controlled trial*").ti,ab |
| 49 |          |                                               |
| 50 |          |                                               |
| 51 | 3        | CINAHL (clinical ADJ3 trial).ti,ab            |
| 52 |          |                                               |
| 53 |          |                                               |
| 54 | 4        | CINAHL (double-blind).ti,ab                   |
| 55 |          |                                               |
| 56 | 5        | CINAHL (single-blind).ti,ab                   |
| 57 |          |                                               |
| 58 |          |                                               |
| 59 | 6        | CINAHL (triple-blind).ti,ab                   |
| 60 |          |                                               |

- 1  
2  
3 7 CINAHL (1 OR 2 OR 3 OR 4 OR 5 OR 6)  
4  
5  
6 8 CINAHL "PLACEBO EFFECT"/  
7  
8 9 CINAHL PLACEBOS/  
9  
10  
11 10 CINAHL (placebo\*).ti,ab  
12  
13 11 CINAHL (random\*).ti,ab  
14  
15  
16 12 CINAHL (8 OR 9 OR 10 OR 11)  
17  
18  
19 13 CINAHL "RANDOM SAMPLE"/  
20  
21 14 CINAHL exp "STUDY DESIGN"/  
22  
23  
24 15 CINAHL (latin square).ti,ab  
25  
26 16 CINAHL exp "COMPARATIVE STUDIES"/  
27  
28  
29 17 CINAHL exp "EVALUATION RESEARCH"/  
30  
31  
32 18 CINAHL exp "PROSPECTIVE STUDIES"/  
33  
34 19 CINAHL (13 OR 14 OR 15 OR 16 OR 17 OR 18)  
35  
36  
37 20 CINAHL (follow-up stud\*).ti,ab  
38  
39 21 CINAHL (followup stud\*).ti,ab  
40  
41  
42 22 CINAHL (control\*).ti,ab  
43  
44  
45 23 CINAHL (prospectiv\*).ti,ab  
46  
47 24 CINAHL (volunteer\*).ti,ab  
48  
49  
50 25 CINAHL (20 OR 21 OR 22 OR 23 OR 24)  
51  
52 26 CINAHL (7 OR 12 OR 19 OR 25)  
53  
54  
55 27 CINAHL ANIMALS/  
56  
57 28 CINAHL 26 not 27  
58  
59  
60

- 1  
2  
3 29 CINAHL ("dorsalgia").ti,ab  
4  
5  
6 30 CINAHL exp "BACK PAIN"/  
7  
8 31 CINAHL "LOW BACK PAIN"/  
9  
10  
11 32 CINAHL ("backache").ti,ab  
12  
13 33 CINAHL (lumbar ADJ1 pain).ti,ab  
14  
15  
16 34 CINAHL (lumbar ADJ5 pain).ti,ab  
17  
18  
19 35 CINAHL (29 OR 30 OR 31 OR 32 OR 33 OR 34)  
20  
21 36 CINAHL COCCYX/  
22  
23  
24 37 CINAHL SCIATICA/  
25  
26 38 CINAHL (sciatica).ti,ab  
27  
28  
29 39 CINAHL (coccyx).ti,ab  
30  
31  
32 40 CINAHL (coccydynia).ti,ab  
33  
34 41 CINAHL "LUMBAR VERTEBRAE"/  
35  
36  
37 42 CINAHL (lumbar ADJ2 vertebra).ti,ab  
38  
39  
40 43 CINAHL (36 OR 37 OR 38 OR 39 OR 40 OR 41 OR 42)  
41  
42 44 CINAHL "THORACIC VERTEBRAE"/  
43  
44  
45 45 CINAHL exp SPONDYLOLYSIS/  
46  
47 46 CINAHL (lumbago).ti,ab  
48  
49  
50 47 CINAHL (44 OR 45 OR 46)  
51  
52 48 CINAHL (35 OR 43 OR 47)  
53  
54  
55 49 CINAHL (28 AND 48)  
56  
57  
58 50 CINAHL (radiofrequency OR radio-frequency).ti,ab  
59  
60

|    |    |                                         |
|----|----|-----------------------------------------|
| 1  |    |                                         |
| 2  |    |                                         |
| 3  | 51 | CINAHL                                  |
| 4  |    | (thermocoag*).ti,ab                     |
| 5  |    |                                         |
| 6  | 52 | CINAHL                                  |
| 7  |    | exp ELECTROCOAGULATION/ OR electrocoag* |
| 8  |    |                                         |
| 9  | 53 | CINAHL                                  |
| 10 |    | (neurotom* OR neuroly*).ti,ab           |
| 11 |    |                                         |
| 12 | 54 | CINAHL                                  |
| 13 |    | "RADIO WAVES"/                          |
| 14 |    |                                         |
| 15 | 55 | CINAHL                                  |
| 16 |    | (50 OR 51 OR 52 OR 53 OR 54)            |
| 17 |    |                                         |
| 18 | 56 | CINAHL                                  |
| 19 |    | (49 AND 55)                             |
| 20 |    |                                         |
| 21 | 57 | CINAHL                                  |
| 22 |    | 56 [DT 2014-2019]                       |

### Cochrane

| #  | Database | Search term                                                                                 |
|----|----------|---------------------------------------------------------------------------------------------|
| 23 |          |                                                                                             |
| 24 |          |                                                                                             |
| 25 |          |                                                                                             |
| 26 |          |                                                                                             |
| 27 |          |                                                                                             |
| 28 | 1        | Cochrane                                                                                    |
| 29 |          | MeSH descriptor: [Back Pain] explode all trees                                              |
| 30 |          |                                                                                             |
| 31 | 2        | Cochrane                                                                                    |
| 32 |          | dorsalgia                                                                                   |
| 33 |          |                                                                                             |
| 34 | 3        | Cochrane                                                                                    |
| 35 |          | backache                                                                                    |
| 36 |          |                                                                                             |
| 37 | 4        | Cochrane                                                                                    |
| 38 |          | MeSH descriptor: [Low Back Pain] explode all trees                                          |
| 39 |          |                                                                                             |
| 40 | 5        | Cochrane                                                                                    |
| 41 |          | lumbar next pain or coccyx or coccydynia or spondylosis                                     |
| 42 |          |                                                                                             |
| 43 | 6        | Cochrane                                                                                    |
| 44 |          | MeSH descriptor: [Spine] explode all trees                                                  |
| 45 |          |                                                                                             |
| 46 | 7        | Cochrane                                                                                    |
| 47 |          | MeSH descriptor: [Spinal Diseases] explode all trees                                        |
| 48 |          |                                                                                             |
| 49 | 8        | Cochrane                                                                                    |
| 50 |          | lumbago OR discitis OR disc near degeneration OR disc near prolapse OR disc near herniation |
| 51 |          |                                                                                             |
| 52 | 9        | Cochrane                                                                                    |
| 53 |          | spinal fusion                                                                               |
| 54 |          |                                                                                             |
| 55 | 10       | Cochrane                                                                                    |
| 56 |          | facet near joints                                                                           |
| 57 |          |                                                                                             |
| 58 | 11       | Cochrane                                                                                    |
| 59 |          | MeSH descriptor: [Intervertebral Disk] explode all trees                                    |
| 60 |          |                                                                                             |
|    | 12       | Cochrane                                                                                    |
|    |          | postlaminectomy                                                                             |

|    |    |          |                                                                                                                                                                                 |
|----|----|----------|---------------------------------------------------------------------------------------------------------------------------------------------------------------------------------|
| 1  |    |          |                                                                                                                                                                                 |
| 2  |    |          |                                                                                                                                                                                 |
| 3  | 13 | Cochrane | arachnoiditis                                                                                                                                                                   |
| 4  |    |          |                                                                                                                                                                                 |
| 5  |    |          |                                                                                                                                                                                 |
| 6  | 14 | Cochrane | failed near back                                                                                                                                                                |
| 7  |    |          |                                                                                                                                                                                 |
| 8  | 15 | Cochrane | MeSH descriptor: [Cauda Equina] explode all trees                                                                                                                               |
| 9  |    |          |                                                                                                                                                                                 |
| 10 |    |          |                                                                                                                                                                                 |
| 11 | 16 | Cochrane | lumbar near vertebra*                                                                                                                                                           |
| 12 |    |          |                                                                                                                                                                                 |
| 13 |    |          |                                                                                                                                                                                 |
| 14 | 17 | Cochrane | spinal near stenosis                                                                                                                                                            |
| 15 |    |          |                                                                                                                                                                                 |
| 16 | 18 | Cochrane | slipped near (disc* or disk*)                                                                                                                                                   |
| 17 |    |          |                                                                                                                                                                                 |
| 18 |    |          |                                                                                                                                                                                 |
| 19 | 19 | Cochrane | degenerat* near (disc* or disk*)                                                                                                                                                |
| 20 |    |          |                                                                                                                                                                                 |
| 21 | 20 | Cochrane | stenosis near (spine or root or spinal)                                                                                                                                         |
| 22 |    |          |                                                                                                                                                                                 |
| 23 |    |          |                                                                                                                                                                                 |
| 24 | 21 | Cochrane | displace* near (disc* or disk*)                                                                                                                                                 |
| 25 |    |          |                                                                                                                                                                                 |
| 26 | 22 | Cochrane | prolap* near (disc* or disk*)                                                                                                                                                   |
| 27 |    |          |                                                                                                                                                                                 |
| 28 |    |          |                                                                                                                                                                                 |
| 29 | 23 | Cochrane | MeSH descriptor: [Sciatic Neuropathy] explode all trees                                                                                                                         |
| 30 |    |          |                                                                                                                                                                                 |
| 31 |    |          |                                                                                                                                                                                 |
| 32 | 24 | Cochrane | sciatic*                                                                                                                                                                        |
| 33 |    |          |                                                                                                                                                                                 |
| 34 |    |          |                                                                                                                                                                                 |
| 35 | 25 | Cochrane | back disorder*                                                                                                                                                                  |
| 36 |    |          |                                                                                                                                                                                 |
| 37 | 26 | Cochrane | back near pain                                                                                                                                                                  |
| 38 |    |          |                                                                                                                                                                                 |
| 39 |    |          |                                                                                                                                                                                 |
| 40 | 27 | Cochrane | #1 or #2 or #3 or #4 or #5 or #6 or #7 or #8 or #9 or #10<br>or #11 or #12 or #13 or #14 or #15 or #16 or #17 or #18<br>or #19 or #20 or #21 or #22 or #23 or #24 or #25 or #26 |
| 41 |    |          |                                                                                                                                                                                 |
| 42 |    |          |                                                                                                                                                                                 |
| 43 |    |          |                                                                                                                                                                                 |
| 44 | 28 | Cochrane | MeSH descriptor: [Radio Waves] explode all trees                                                                                                                                |
| 45 |    |          |                                                                                                                                                                                 |
| 46 |    |          |                                                                                                                                                                                 |
| 47 | 29 | Cochrane | MeSH descriptor: [Pulsed Radiofrequency Treatment]<br>explode all trees                                                                                                         |
| 48 |    |          |                                                                                                                                                                                 |
| 49 |    |          |                                                                                                                                                                                 |
| 50 | 30 | Cochrane | radiofrequency                                                                                                                                                                  |
| 51 |    |          |                                                                                                                                                                                 |
| 52 |    |          |                                                                                                                                                                                 |
| 53 | 31 | Cochrane | radio frequency or radio-frequency                                                                                                                                              |
| 54 |    |          |                                                                                                                                                                                 |
| 55 |    |          |                                                                                                                                                                                 |
| 56 | 32 | Cochrane | MeSH descriptor: [Electrocoagulation] explode all trees                                                                                                                         |
| 57 |    |          |                                                                                                                                                                                 |
| 58 | 33 | Cochrane | electrocoag*                                                                                                                                                                    |
| 59 |    |          |                                                                                                                                                                                 |
| 60 |    |          |                                                                                                                                                                                 |



- 1  
2  
3 34 Cochrane thermocoag\*  
4  
5  
6 35 Cochrane neurotom\* or neuroly\*  
7  
8 36 Cochrane #28 or #29 or #30 or #31 or #32 or #33 or #34 or #35  
9  
10  
11 37 Cochrane #27 and #36 in Trials  
12  
13  
14  
15  
16  
17  
18  
19  
20  
21  
22  
23  
24  
25  
26  
27  
28  
29  
30  
31  
32  
33  
34  
35  
36  
37  
38  
39  
40  
41  
42  
43  
44  
45  
46  
47  
48  
49  
50  
51  
52  
53  
54  
55  
56  
57  
58  
59  
60

For peer review only

## Appendix 2 Study characteristics

| Study                         | N   | Inclusion criteria                                                                                        |                                                                                             | Mean age (SD)                                    | Mean pain score (SD)                   | Intervention                                                            | Control                                                                   | Funding                                                                                                                                             |
|-------------------------------|-----|-----------------------------------------------------------------------------------------------------------|---------------------------------------------------------------------------------------------|--------------------------------------------------|----------------------------------------|-------------------------------------------------------------------------|---------------------------------------------------------------------------|-----------------------------------------------------------------------------------------------------------------------------------------------------|
| <b>RD of the facet joints</b> |     |                                                                                                           |                                                                                             |                                                  |                                        |                                                                         |                                                                           |                                                                                                                                                     |
| <b>Gallagher 1994</b>         | 41  | Low back pain >3 months duration with symptoms typical of facet joint pain                                | Improvement (n=30) or equivocal (n=11) response to anaesthetic block                        | NR                                               | VAS RD 5.8 (1.78); Sham 7.2 (1.94)     | Nerves above and below painful joint denervated at 80° for 90 seconds.  | Nerves also identified with stimulation but no heat lesion made           | NR                                                                                                                                                  |
| <b>Juch 2017</b>              | 251 | Low back pain without response to conservative management and considered to be related to the facet joint | Positive response to anaesthetic block (reported 50% pain relief 30-90 minutes after block) | RD 53.0 (11.5); Control 52.6 (10.8)              | NRS RD 7.14 (1.38) Control 7.19 (1.29) | Denervation at 90° for 90s of L3-4, L4-5 or L5-S1 with exercise program | Exercise program                                                          | The Netherlands Organization for Health Research and Development, by the Dutch Society for Anesthesiology, and the Dutch health insurance companies |
| <b>Leclaire 2001</b>          | 70  | Low back pain for >3 months                                                                               | “Significant” relief of back pain for >24h following facet injections                       | RD 46.7 (9.3); Sham 46.4 (9.8)                   | VAS RD 5.19 (2.67); Sham 5.15 (2.08)   | RD with fluoroscopic guidance at 80°C for 90s of at least 2 levels      | Nerves also identified with stimulation but electrode only heated to 37°C | Institut de recherche en sante´ and se´curite´ du travail du Que´bec                                                                                |
| <b>Moussa 2016</b>            | 80  | Low back pain for >1 year without response to conservative management                                     | Complete or near complete reduction of CLBP on VAS 30 min after 2                           | RD capsule 58.1 (NR); RD conventional 56.5 (NR); | VAS RD 8.22 (NR); Sham 7.83 (NR)       | RD of facet capsule on medial and lateral aspect or                     | Same procedure without elect current turned on                            | No funding received                                                                                                                                 |

|                         |    |                                                                                                           |                                                                                              |                                |                                  |                                                                                        |                                                                       |                                                   |
|-------------------------|----|-----------------------------------------------------------------------------------------------------------|----------------------------------------------------------------------------------------------|--------------------------------|----------------------------------|----------------------------------------------------------------------------------------|-----------------------------------------------------------------------|---------------------------------------------------|
|                         |    |                                                                                                           | injections separated by >2 weeks                                                             | Sham 55.9 (NR)                 |                                  | conventional RD at 85°C for 90s                                                        |                                                                       |                                                   |
| <b>Nath 2008</b>        | 40 | Low back pain for >2 years, not responded to previous treatment, pain attributable to lumbar facet joints | 80% pain relief on 3 medial branch blocks                                                    | 56 (range, 36–79)              | VAS RD 5.98 (NR); Sham 4.38 (NR) | RD at 85°C for 60s with additional lesions just lateral and medial to the target nerve | Same procedure as RD but electrode tip remained at body temperature   | No funding received                               |
| <b>Tekin 2007</b>       | 40 | Back pain for >6 months with focal pain over the facet joints and unresponsive to conservative treatments | >50% reduction in VAS pain 30 minutes after diagnostic medial branch block                   | RD 60.5 (8.5); Sham 57.9 (9.3) | VAS RD 6.5 (1.5); Sham 6.8 (1.6) | RD at same levels as diagnostic blocks at 80°C for 90s.                                | Same procedure as RD but with current switched off                    | Not reported                                      |
| <b>Van Kleef 1999</b>   | 32 | Low back pain of >12 months duration, failure of conservative management                                  | >50% reduction in pain following diagnostic nerve block of L3-L5<br>Baseline VAS score of >4 | RD 46.6 (7.4); Sham 41.4 (7.5) | VAS RD 5.2 (1.7); Sham 5.2 (1.6) | RD at 80°C for 60s                                                                     | Same procedure as RD but with current switched off                    | The Nederlandse organisatie voor wetenschappelijk |
| <b>Van Tilburg 2016</b> | 60 | Low back pain for >3 months and failure of conservative management                                        | Decrease of >2 on medial branch block                                                        | RD 65 (12); Sham 58 (12)       | NRS RD 7.2 (1.4); Sham 7.4 (0.8) | RD at 80°C for 60s per level for three steps with physiotherapy                        | Same procedure as RD but with current switched off with physiotherapy | No funding from a commercial party                |
| <b>Van Wijk 2005</b>    | 81 | Low back pain for >6 months                                                                               | ≥50% reduction on                                                                            | RD 46.9 (11.5);                | VAS RD 5.8 (1.8);                | RD 80°C for 60 seconds                                                                 | Same procedure as                                                     | Grant from the Dutch Health                       |

1  
2  
3  
4  
5  
6  
7  
8  
9  
10  
11  
12  
13  
14  
15  
16  
17  
18  
19  
20  
21  
22  
23  
24  
25  
26  
27  
28  
29  
30  
31  
32  
33  
34  
35  
36  
37  
38  
39  
40  
41  
42  
43  
44  
45  
46

diagnostic block Sham 48.1 (12.6) Sham 6.5 (1.8) at the levels concerned RD but with current switched off Insurance Council

**RD of the sacroiliac joints**

|                   |     |                                                                                                                                     |                                                                                                                   |                                     |                                         |                                                                                                         |                                                                       |                                                                                                                                                             |
|-------------------|-----|-------------------------------------------------------------------------------------------------------------------------------------|-------------------------------------------------------------------------------------------------------------------|-------------------------------------|-----------------------------------------|---------------------------------------------------------------------------------------------------------|-----------------------------------------------------------------------|-------------------------------------------------------------------------------------------------------------------------------------------------------------|
| <b>Cohen 2008</b> | 28  | Axial low back or buttock pain ≥ 6 months, tenderness overlying the sacroiliac joint(s), failure to respond to conservative therapy | ≥ 75% pain relief for ≥3h following diagnostic sacroiliac joint injection, but back near baseline within 2 months | RD 51.9 (13.6); Sham 51.8 (13.1)    | VAS RD 6.1 (1.8); Sham 6.5 (1.9)        | RD 80°C for 90 seconds using cooling probe technology (Cooled RD)                                       | Same procedure as RD but no current applied                           | John P. Murtha Neuroscience and Pain Institute, the Army Regional Anesthesia & Pain Medicine Initiative, and National Institutes of Health grant # MH075884 |
| <b>Juch 2017</b>  | 228 | Low back pain without response to conservative management, considered to be related to the sacroiliac joint.                        | Positive response to anaesthetic block (reported 50% pain relief 30-90 minutes after block)                       | RD 51.6 (10.9); Control 51.1 (12.2) | NRS RD 7.17 (1.65); Control 7.06 (1.43) | RD - 60° for 2.5 min per lesion of S1, S2 and S3 with exercise program                                  | Exercise program                                                      | The Netherlands Organization for Health Research and Development, by the Dutch Society for Anesthesiology, and the Dutch health insurance companies         |
| <b>Mehta 2018</b> | 17  | CLBP for >6 months. >5 on NRS                                                                                                       | >80% pain reduction on 2 diagnostic blocks                                                                        | RD 56.6 (NR); Sham 62.6 (NR)        | VAS RD 8.1 (0.8); Sham 7.3 (0.8)        | RD of the L5 medial branch of the primary dorsal root nerve and strip lesioning of the lateral branches | Identical to active RD treatment except that no RF energy was applied | None                                                                                                                                                        |

|                                       |    |                                                                                                          |                                                                                                                                                  |                                            |                                           |                                                                                                                       |                                                                   |                                                                     |
|---------------------------------------|----|----------------------------------------------------------------------------------------------------------|--------------------------------------------------------------------------------------------------------------------------------------------------|--------------------------------------------|-------------------------------------------|-----------------------------------------------------------------------------------------------------------------------|-------------------------------------------------------------------|---------------------------------------------------------------------|
|                                       |    |                                                                                                          |                                                                                                                                                  |                                            |                                           | of the S1, 2, and<br>3 nerve roots                                                                                    |                                                                   |                                                                     |
| <b>Patel 2012</b>                     | 51 | Pain for ≥6 months,<br>3-day average NRS<br>between 4 and 8,<br>failure of<br>conservative<br>management | ≥75% pain<br>reduction for<br>4h-7 days on<br>two sets of<br>anaesthetic<br>blocks and<br>back to<br>baseline by<br>start of the<br>study        | RD 56 (15);<br>Sham 64<br>(14)             | NRS RD 6.1<br>(1.3);<br>Sham 5.8<br>(1.3) | RD at 60°C for<br>150s of L5<br>dorsal ramus<br>and then acral<br>lateral branches<br>of S1, S2 and<br>S3 (cooled RD) | Same<br>procedure as<br>RD but RF<br>energy was<br>not delivered. | Baylis Medical                                                      |
| <b>Van Tilburg<br/>2016</b>           | 60 | Sacroiliac joint pain<br>for >3 months,<br>failure of<br>conservative<br>management                      | Decrease of<br>≥2 on NRS<br>following<br>diagnostic<br>block                                                                                     | RD 59.5<br>(27); Sham<br>62 (18)           | NRS RD 7.2<br>(1.4);<br>Sham 7.5<br>(1.2) | 85°C each<br>step for 90s,<br>total of 5 steps                                                                        | Same<br>procedure as<br>RD but no<br>heat lesions<br>made         | Not reported                                                        |
| <b>RD of the intervertebral discs</b> |    |                                                                                                          |                                                                                                                                                  |                                            |                                           |                                                                                                                       |                                                                   |                                                                     |
| <b>Barendse<br/>2001</b>              | 28 | Non-specific LBP for<br>>1y, failure of<br>conservative<br>management                                    | >50% pain<br>relief 30<br>minutes after<br>an analgesic<br>discography<br>at L4–L5 and<br>L5–S1.<br>Patients with<br>multilevel pain<br>excluded | RD 40.8<br>(7.5); Sham<br>45.2 (8.4)       | VAS RD 6.5<br>(1.3);<br>Sham 5.5<br>(1.1) | 70°C for 90s<br>without<br>anaesthetic                                                                                | Same<br>procedure as<br>RD but no<br>current<br>applied           | Not reported                                                        |
| <b>Desai 2016</b>                     | 63 | Lumbar discogenic<br>pain for ≥6 months,<br>unresponsive to<br>conservative<br>management                | Diagnosed via<br>provocation<br>discography -<br>definite<br>single-level<br>concordant                                                          | Mean age 41<br>(11);<br>Control 43<br>(11) | VAS RD 6.7<br>(NR);<br>Sham 7 (NR)        | RD at 50°C for<br>15 minutes and<br>then 60°C for<br>2.5 min (bopolar<br>cooled RD) with<br>conventional              | Conventional<br>medical<br>management                             | Halyard Health,<br>Inc. (formerly<br>Kimberly-Clark<br>Health Care) |

|                                              |    |                                                                                                                                                    |                                                                                                                                             |                                  |                                      |                                                                                                        |                                                                                                                                   |                                                                |
|----------------------------------------------|----|----------------------------------------------------------------------------------------------------------------------------------------------------|---------------------------------------------------------------------------------------------------------------------------------------------|----------------------------------|--------------------------------------|--------------------------------------------------------------------------------------------------------|-----------------------------------------------------------------------------------------------------------------------------------|----------------------------------------------------------------|
|                                              |    |                                                                                                                                                    | pain on manometry                                                                                                                           |                                  |                                      | medical management                                                                                     |                                                                                                                                   |                                                                |
| <b>Kapural 2013</b>                          | 55 | CLBP unresponsive to conservative management for ≥6 months; no surgical interventions within previous 3 months                                     | Single-level degenerative disc disease or two-level disease without evidence of additional degenerative changes in other disc spaces on MRI | RD 40.4 (10.3); Sham 38.4 (10.4) | VAS RD 7.13 (1.61); Sham 7.18 (1.98) | RD at 45°C bipolar for 15 minutes or 50°C bipolar for 15 minutes and monopolar at 60°C for 2.5 minutes | Mimicked active treatment, except that introducers and electrodes positioned just outside of the disc, and no RF energy delivered | Baylis Medical                                                 |
| <b>Kvarstein 2009</b>                        | 20 | Unremitting low back pain for more than 6 months; Pain intensity ≥5 /10 and low back pain greater than leg pain; Failure on conservative treatment | Positive one-level pain provocation discography                                                                                             | RD 44.7 (10.1); Sham 39.6 (8.9)  | NRS RD 4.6 (1.8); Sham 5.5 (2.0)     | RD increased by 5°C every second minute to 4-min interval at 65°C (from 50°C)                          | Exposed to a similar intervention, but the annulus was not exposed to RF heating                                                  | Radionics, TYCO Healthcare Group provided the discTRODE probes |
| <b>Van Tilburg 2017</b>                      | 60 | Low back pain >3 months and symptoms suggestive of lumbar disc problem                                                                             | Reduction of ≥2 on a numerical rating scale (0–10) after a diagnostic ramus communicans test block                                          | RD 50.5 (13.9); Sham 50.1 (12.3) | NRS 7.8 (1.05); Sham 7.8 (1.05)      | RD treatment at 80 °C for 60s per level                                                                | Same procedure but without RF treatment                                                                                           | No support received that influenced submitted work             |
| <b>RD of the vertebrae body and endplate</b> |    |                                                                                                                                                    |                                                                                                                                             |                                  |                                      |                                                                                                        |                                                                                                                                   |                                                                |

|    |                   |     |                      |               |             |             |                   |               |              |
|----|-------------------|-----|----------------------|---------------|-------------|-------------|-------------------|---------------|--------------|
| 1  |                   |     |                      |               |             |             |                   |               |              |
| 2  |                   |     |                      |               |             |             |                   |               |              |
| 3  | <b>Fischgrund</b> | 225 | CLBP ≥6 months,      | No diagnostic | RD 46.9     | VAS RD 6.73 | Thermal           | Same          | Not reported |
| 4  | <b>2018</b>       |     | not responded to     | block for     | (range 26–  | (1.38);     | ablation at       | procedure as  |              |
| 5  |                   |     | conservative         | inclusion     | 69); Sham   | Sham 6.64   | the terminus of   | RD but only   |              |
| 6  |                   |     | treatment, Type 1 or |               | 47.1 (range | (1.34)      | the basivertebral | docking       |              |
| 7  |                   |     | Type 2 Modic         |               | 25–69)      |             | nerve 85°C for    | introducer    |              |
| 8  |                   |     | changes required     |               |             |             | 15 min            | cannula 1–2   |              |
| 9  |                   |     | at the proposed      |               |             |             |                   | mm            |              |
| 10 |                   |     | treatment levels     |               |             |             |                   | into the      |              |
| 11 |                   |     |                      |               |             |             |                   | pedicle and   |              |
| 12 |                   |     |                      |               |             |             |                   | simulating RD |              |
| 13 |                   |     |                      |               |             |             |                   |               |              |
| 14 |                   |     |                      |               |             |             |                   |               |              |
| 15 |                   |     |                      |               |             |             |                   |               |              |
| 16 |                   |     |                      |               |             |             |                   |               |              |
| 17 |                   |     |                      |               |             |             |                   |               |              |
| 18 |                   |     |                      |               |             |             |                   |               |              |
| 19 |                   |     |                      |               |             |             |                   |               |              |
| 20 |                   |     |                      |               |             |             |                   |               |              |
| 21 |                   |     |                      |               |             |             |                   |               |              |
| 22 |                   |     |                      |               |             |             |                   |               |              |
| 23 |                   |     |                      |               |             |             |                   |               |              |
| 24 |                   |     |                      |               |             |             |                   |               |              |
| 25 |                   |     |                      |               |             |             |                   |               |              |
| 26 |                   |     |                      |               |             |             |                   |               |              |
| 27 |                   |     |                      |               |             |             |                   |               |              |
| 28 |                   |     |                      |               |             |             |                   |               |              |
| 29 |                   |     |                      |               |             |             |                   |               |              |
| 30 |                   |     |                      |               |             |             |                   |               |              |
| 31 |                   |     |                      |               |             |             |                   |               |              |
| 32 |                   |     |                      |               |             |             |                   |               |              |
| 33 |                   |     |                      |               |             |             |                   |               |              |
| 34 |                   |     |                      |               |             |             |                   |               |              |
| 35 |                   |     |                      |               |             |             |                   |               |              |
| 36 |                   |     |                      |               |             |             |                   |               |              |
| 37 |                   |     |                      |               |             |             |                   |               |              |
| 38 |                   |     |                      |               |             |             |                   |               |              |
| 39 |                   |     |                      |               |             |             |                   |               |              |
| 40 |                   |     |                      |               |             |             |                   |               |              |
| 41 |                   |     |                      |               |             |             |                   |               |              |
| 42 |                   |     |                      |               |             |             |                   |               |              |
| 43 |                   |     |                      |               |             |             |                   |               |              |
| 44 |                   |     |                      |               |             |             |                   |               |              |
| 45 |                   |     |                      |               |             |             |                   |               |              |
| 46 |                   |     |                      |               |             |             |                   |               |              |

CLBP, chronic low back pain; N, number of trials; NRS, numeric rating scale; RD, radiofrequency denervation; SD, standard deviation; VAS, visual analogue scale.

# BMJ Open

## Radiofrequency denervation for chronic back pain: a systematic review and meta-analysis

|                                 |                                                                                                                                                                                                                                                                                                                                                                                                                                            |
|---------------------------------|--------------------------------------------------------------------------------------------------------------------------------------------------------------------------------------------------------------------------------------------------------------------------------------------------------------------------------------------------------------------------------------------------------------------------------------------|
| Journal:                        | <i>BMJ Open</i>                                                                                                                                                                                                                                                                                                                                                                                                                            |
| Manuscript ID                   | bmjopen-2019-035540.R2                                                                                                                                                                                                                                                                                                                                                                                                                     |
| Article Type:                   | Original research                                                                                                                                                                                                                                                                                                                                                                                                                          |
| Date Submitted by the Author:   | 15-May-2020                                                                                                                                                                                                                                                                                                                                                                                                                                |
| Complete List of Authors:       | Chappell, Mary; Cambridgeshire County Council, Public Health Directorate<br>Lakshman, Raj; Cambridgeshire County Council, Public Health Directorate; University of Cambridge, Medical Research Council Epidemiology Unit<br>Trotter, Patrick; Cambridge University Hospitals NHS Foundation Trust<br>Abrahams, Mark; Cambridge University Hospitals NHS Foundation Trust<br>Lee, Michael; University of Cambridge, Division of Anaesthesia |
| <b>Primary Subject Heading</b>: | Rheumatology                                                                                                                                                                                                                                                                                                                                                                                                                               |
| Secondary Subject Heading:      | Neurology                                                                                                                                                                                                                                                                                                                                                                                                                                  |
| Keywords:                       | Back pain < ORTHOPAEDIC & TRAUMA SURGERY, Rheumatology < INTERNAL MEDICINE, Neurology < INTERNAL MEDICINE, PAIN MANAGEMENT                                                                                                                                                                                                                                                                                                                 |
|                                 |                                                                                                                                                                                                                                                                                                                                                                                                                                            |

SCHOLARONE™  
Manuscripts





I, the Submitting Author has the right to grant and does grant on behalf of all authors of the Work (as defined in the below author licence), an exclusive licence and/or a non-exclusive licence for contributions from authors who are: i) UK Crown employees; ii) where BMJ has agreed a CC-BY licence shall apply, and/or iii) in accordance with the terms applicable for US Federal Government officers or employees acting as part of their official duties; on a worldwide, perpetual, irrevocable, royalty-free basis to BMJ Publishing Group Ltd ("BMJ") its licensees and where the relevant Journal is co-owned by BMJ to the co-owners of the Journal, to publish the Work in this journal and any other BMJ products and to exploit all rights, as set out in our [licence](#).

The Submitting Author accepts and understands that any supply made under these terms is made by BMJ to the Submitting Author unless you are acting as an employee on behalf of your employer or a postgraduate student of an affiliated institution which is paying any applicable article publishing charge ("APC") for Open Access articles. Where the Submitting Author wishes to make the Work available on an Open Access basis (and intends to pay the relevant APC), the terms of reuse of such Open Access shall be governed by a Creative Commons licence – details of these licences and which [Creative Commons](#) licence will apply to this Work are set out in our licence referred to above.

Other than as permitted in any relevant BMJ Author's Self Archiving Policies, I confirm this Work has not been accepted for publication elsewhere, is not being considered for publication elsewhere and does not duplicate material already published. I confirm all authors consent to publication of this Work and authorise the granting of this licence.

1  
2  
3 **Radiofrequency denervation for chronic back pain: a systematic review and**  
4 **meta-analysis**  
5  
6

7  
8 Mary E Chappell<sup>1</sup>, Raj Lakshman<sup>1,2</sup>, Patrick Trotter<sup>3</sup>, Mark J Abrahams<sup>3</sup>, Michael C  
9 Lee<sup>4</sup>  
10

11  
12  
13 <sup>1</sup>Public Health Directorate, Cambridgeshire County Council, Cambridge, UK  
14

15  
16 <sup>2</sup>Medical Research Council Epidemiology Unit, University of Cambridge, Cambridge  
17  
18 UK  
19

20  
21 <sup>3</sup>Cambridge University Hospitals NHS Foundation trust, Cambridge, UK  
22

23  
24 <sup>4</sup>Division of Anaesthesia, University of Cambridge, Cambridge, UK  
25  
26  
27  
28

29  
30 Correspondence to: Mary E Chappell, Public Health Directorate, Cambridgeshire  
31  
32 County Council, Cambridge CB3 0AP, UK. Tel. 01223 729037  
33

34  
35 Email [mary.chappell@cambridgeshire.gov.uk](mailto:mary.chappell@cambridgeshire.gov.uk)  
36  
37  
38  
39

40  
41 Word count:

42  
43 Abstract 221  
44

45  
46 Main text 4,188  
47  
48  
49  
50  
51  
52  
53  
54  
55  
56  
57  
58  
59  
60

## Abstract

Objectives: To assess the effectiveness of radiofrequency denervation of lumbosacral anatomical targets for the management of chronic back pain.

Design: Systematic review and meta-analysis of randomised controlled trials.

Methods: A database search (Medline, Medline in Process, Embase, CINHAL and the Cochrane library) was conducted to April 2019 for placebo or no-treatment controlled trials of radiofrequency denervation for the management of chronic back pain. Included trials were quality assessed using the Cochrane risk of bias tool and the quality of outcomes assessed using the GRADE approach. Meta-analysis was conducted to calculate mean difference in post-treatment pain score.

Results: Nineteen randomised controlled trials were included in the review. There appears to be short-term pain relief (1-3 months) provided by radiofrequency denervation of the sacroiliac joint (5 trials, MD -1.53, CI -2.62, -0.45) and intervertebral discs (4 trials, MD -0.98, CI -1.84, -0.12) but the placebo effect is large and additional intervention effect size is small (<1 on a 11 point (0-10) pain scale). Longer-term effectiveness (>6 months) is uncertain.

Conclusions: Radiofrequency denervation of selected lumbosacral targets appears to have a small, short-term, positive effect for the management of patients with chronic back pain. However, the quality of evidence for the majority of outcomes is low or very low quality and there is still a degree of uncertainty, particularly around the duration of effect.

1  
2  
3  
4  
5  
6 Strengths and limitations of this study:  
7  
8

- 9
- 10 • This review brings together a number of recent trials with earlier trials so that  
11 there is a sizable sum of evidence on which to assess the effectiveness of  
12 radiofrequency denervation for back pain.  
13
  - 14 • Due to the invasive nature of the procedure, it is difficult to perform truly  
15 patient or provider blinded trials and this brings some uncertainty around  
16 findings.  
17
  - 18 • There is limited reporting of long-term outcomes (>6 months) for the  
19 effectiveness of radiofrequency denervation.  
20  
21  
22  
23  
24  
25  
26  
27  
28  
29  
30  
31  
32  
33  
34  
35  
36  
37  
38  
39  
40  
41  
42  
43  
44  
45  
46  
47  
48  
49  
50  
51  
52  
53  
54  
55  
56  
57  
58  
59  
60

## Introduction

Back pain is an extremely common symptom experienced by people of all ages, and can be attributed to a wide variety of disease processes.<sup>1,2</sup> Low back pain is now the leading cause of disability worldwide and back pain is associated with a substantial economic burden, with high medical and societal costs.<sup>3</sup> Studies have shown that a large proportion of medical costs come from hospital admissions and physical therapy for the management of back pain.<sup>4</sup> However, there are also indirect costs associated with chronic or recurrent back pain that are difficult to quantify relating to work absenteeism and related productivity.<sup>1,3,4</sup> In many cases, back pain is non-specific, or structural pathology amenable to surgical correction cannot be identified.<sup>5-7</sup> Hence, patients and practitioners continue to seek non-surgical alternatives for the management of back pain.

Radiofrequency denervation (RD) involves the application of an alternating electric current (250 to 500kHz) via a needle probe to induce a highly localised rise in tissue temperature at the needle tip.<sup>8</sup> The needle tip is usually placed under fluoroscopic guidance to enable selective ablation of sensory nerve branches that supply facet joints, sacroiliac joint or other structures that comprise the lumbosacral spine. RD would therefore offer relief of pain by attenuating sensory signals from the lumbosacral spine.<sup>9</sup>

Despite its use for over 20 years,<sup>10</sup> the effectiveness of RD targeted at the anatomy of the lumbosacral spine is not yet established, with randomised controlled trials (RCTs) continuing to be performed. A number of trials have been published since the publication of the last high quality review in 2015<sup>11</sup> and our systematic review aimed to bring together this evidence in an attempt to evaluate whether RD is an effective intervention for the management of chronic non-specific back pain.

## Materials and Methods

### *Search strategy*

A search was conducted in Medline, Medline in Process, Embase, CINHAL and the Cochrane library from January 2014 to April 2019 (Appendix 1). Previous systematic reviews were used to obtain additional relevant studies published pre 2014.

### *Inclusion criteria*

RCTs comparing RD of the spine with a control in patients with back pain with or without sciatica were included. Only trials of radiofrequency procedures for the purpose of ablating or denaturing sensory nerve branches or nociceptors that supply the lumbosacral spine were considered for inclusion. Trials of pulsed RF,<sup>12</sup> or other forms of 'neuromodulatory' procedures that do not aim to ablate or denature these targets, were excluded from the review. Control groups where there was no active treatment were considered for inclusion but trials with potentially effective comparators e.g. corticosteroid injections, were excluded. Only trials of patients with back pain without a definite or surgically remediable cause (chronic non-specific back pain) were included in the review. The outcome for the review was patient-reported pain score e.g. Visual Analogue Scale or Numeric Rating Scale.

### *Data collection and quality assessment*

Trial characteristics were recorded from included studies. Study results were extracted independently by two authors (MC, PT), with any disagreements resolved by consensus. The overall strength of evidence was assessed using the GRADE approach.<sup>13</sup> Risk of bias was assessed using the Cochrane Risk of Bias tool.<sup>14</sup> Any outcome where more than half of trials were considered to have a high or unclear risk of bias was downgraded. Outcomes were also downgraded where heterogeneity

1  
2  
3 in the meta-analysis was greater than 50%. Optimal sample size was taken to be 85  
4  
5 participants per study arm (as calculated in the Juch 2017 trial<sup>15</sup>) and studies with  
6  
7 less than 170 participants, and/or where the 95% confidence intervals included the  
8  
9 line of no effect, were downgraded for imprecision. Publication bias was assessed  
10  
11 using funnel plots and outcomes downgraded where there was a high certainty of  
12  
13 publication bias.  
14  
15

### 16 17 *Data analysis*

18  
19  
20 Meta-analyses were conducted in RevMan<sup>16</sup> with random effects models since the  
21  
22 included studies investigated effectiveness in different population groups with  
23  
24 varying intervention and control group treatments. Pain score at 1-3 months was  
25  
26 taken as the primary outcome (longest time point used for studies reporting multiple  
27  
28 time points), allowing outcome from a larger number of studies to be combined. Pain  
29  
30 score data were reported on a 0-10 point scale (Visual Analogue Scale or Numeric  
31  
32 Rating Scale) in all studies and the mean difference was therefore calculated without  
33  
34 standardisation as done in the previous Cochrane review.<sup>11</sup> Studies with different  
35  
36 spinal targets e.g. facet joints, sacroiliac joints or inter-vertebrae disc, were  
37  
38 separated in the analysis. A sensitivity analysis was conducted to check the validity  
39  
40 of findings by removing studies considered to have a particularly high risk of bias.  
41  
42 Subgroup analysis to explore study heterogeneity was not conducted because of the  
43  
44 small number of studies and high likelihood of reaching spurious conclusions.  
45  
46  
47  
48  
49

## 50 **Results**

### 51 52 53 *Study characteristics*

54  
55  
56 The search identified 922 citations of which 229 were duplicates. Studies were  
57  
58 excluded as shown in figure 1. Of the 693 citations reviewed, 8 new trials were  
59  
60

1  
2  
3 identified as well as 11 from a previous Cochrane review.<sup>11</sup> Exclusions were made  
4 as shown in figure 1. Nineteen trials were included in the review and their  
5 characteristics are shown in appendix 2. Trials investigated the effectiveness of RD  
6 of the facet joint (supplied by medial branch of the dorsal spinal ramus),<sup>15,17–24</sup> the  
7 sacroiliac joints,<sup>15,25–28</sup> the intervertebral discs,<sup>29–33</sup> or vertebrae end-plate (supplied  
8 by the basivertebral nerve).<sup>34</sup> The majority of trials used a sham control group but  
9 one large trial compared RD with no treatment (both groups received an exercise  
10 program) and one small trial compared RD plus conventional medical with  
11 conventional medical management alone (including self-care, medications and  
12 physical and cognitive therapy).  
13  
14  
15  
16  
17  
18  
19  
20  
21  
22  
23  
24  
25

### 26 *Study quality*

27  
28 Sham-controlled trials generally appear to have conducted adequate randomisation  
29 but allocation concealment was often unclear. Processes were in place to blind  
30 patients and providers and outcome assessors. In some trials, maintenance of  
31 blinding was unclear as it was evident that patients undergoing sham procedures  
32 were offered RD in case of sham treatment failure. In these cases, blinding would  
33 have been broken. Most trials did not report dropouts and there was unclear risk of  
34 attrition bias. The outcome for this review was pain score and this was reported in all  
35 trials and reporting bias was not considered to be an issue in the review. Four trials  
36 were identified as having high risk of bias and were removed in the sensitivity  
37 analysis.<sup>17,19,24,25</sup>  
38  
39  
40  
41  
42  
43  
44  
45  
46  
47  
48  
49  
50  
51

### 52 *Overall quality of the evidence*

53  
54 The majority of outcomes were graded down for imprecision and all outcomes were  
55 downgraded for potential risk of bias. Consequently, almost all outcomes were  
56  
57  
58  
59  
60



1  
2  
3 graded as low quality. However, in some cases, high heterogeneity was also present  
4  
5 and these outcomes were graded as very low quality. Publication bias was  
6  
7 suggested by asymmetry in a number of the funnel plots. However, there was  
8  
9 uncertainty due to the small numbers of studies and outcomes were not graded  
10  
11 down for publication bias.  
12  
13

### 14 15 *Study findings*

16  
17  
18 Results of the meta-analyses are shown in table 1.  
19

### 20 21 *RD of the facet joints*

22  
23 Meta-analysis of pain scores at 1-3 months post procedure (longest time point used  
24  
25 for studies with multiple time points) (marked on a 0-10 scale) is shown in figure 2  
26  
27 and table 1. The effect size was similar when all trials were included (7 trials, MD -  
28  
29 0.56, CI -1.13, 0.01) or where just the sham-controlled trials were included (6 trials,  
30  
31 MD -0.63, CI -1.39, 0.12) but the effect was not significant for either. We also  
32  
33 considered outcomes at 6 and 12 months, where data were available to explore  
34  
35 longer term outcomes, but did not find any significant effect (table 1).  
36  
37  
38  
39

### 40 41 *RD of the sacroiliac joints*

42  
43 Figure 3 shows the meta-analysis of trials for pain score at 1-3 months (longest time  
44  
45 point used for studies with multiple time points). There was a significant effect of RD  
46  
47 for the analysis including all trials (5 trials, MD -1.53, CI -2.62, -0.45) or just sham-  
48  
49 controlled trials (4 trials, MD -1.89, CI -3.45, -0.34). Only one trial<sup>15</sup> assessed  
50  
51 outcome at later time points and this showed no significant difference compared to a  
52  
53 no treatment control (table 1).  
54  
55

### 56 57 *RD of the intervertebral discs*

1  
2  
3 Pain score at 1-3 months post-treatment was significantly lower for RD compared  
4 with control in all trials (4 trials, MD -0.98, CI -1.84, -0.12) but not for sham-controlled  
5 trials alone (3 trials, MD -0.63, CI -1.36, 0.10) (figure 4). Pain score was significantly  
6 lower for RD when all trials and sham-controlled trials were considered at 6 months  
7 but, for one trial assessing outcome at one year, it was not (table 1).

#### 15 *RD of the vertebrae body and end plate*

16  
17 One trial of RD for vertebrae body and end plate (basivertebral nerve ablation)<sup>34</sup> did  
18 not show significant benefits of RD compared with sham at 3, 6 or 12 months (table  
19 1).

#### 25 *Sensitivity analysis*

26  
27 Four studies were removed in the sensitivity analysis due to a high risk of  
28 methodological bias<sup>17,19,24,25</sup> and the two non-sham controlled trials were also  
29 removed.<sup>15,32</sup> After the removal of these trials, outcome at 1-3 months for facet joint  
30 sham trials was still not significant (4 trials, MD -0.57, CI -1.60, 0.46) and 1-3 month  
31 outcome for sacroiliac sham trials became non-significant (3 trials, MD -1.21, CI -  
32 2.59, 0.16). The facet joint sham trial outcome at 6 months also became non-  
33 significant (1 trial, MD 0.18, CI -2.80, 3.16).

## 44 **Discussion**

### 47 *Main findings*

48  
49 This systematic review presents evidence suggesting that RD of the lumbosacral  
50 spine may have a small positive but short-lived effect in patients with chronic back  
51 pain, depending on the precise part of the anatomy that is being targeted by the  
52 procedure. The quality of evidence for the majority of findings is low or very low  
53 quality and there is still a degree of uncertainty around this assertion, particularly  
54  
55  
56  
57  
58  
59  
60

1  
2  
3 around the duration of effect. The size of benefit appears to be small (<1 point on a  
4 0-10 pain scale) and there is limited data for outcomes beyond 6 months. These  
5 assertions apply to RD for sacroiliac joints, whereas evidence for benefit to other  
6 targets is more limited. RD for facet joints did not show a significant benefit on 1-3  
7 month outcome. There is a suggestion that there may be a benefit of RD for  
8 intervertebral discs but there is some inconsistency, with insignificant effect for short-  
9 term outcomes.

10  
11  
12  
13  
14  
15  
16  
17  
18  
19  
20  
21  
22  
23  
24  
25  
26  
27  
28  
29  
30  
31  
32  
33  
34  
35  
36  
37  
38  
39  
40  
41  
42  
43  
44  
45  
46  
47  
48  
49  
50  
51  
52  
53  
54  
55  
56  
57  
58  
59  
60  
What is also clear from the review is that both treatment and sham/no treatment  
groups improved during the trials. In the sham controlled trials, this may, in part, be  
due to placebo effect. However, the large trial by Juch et al<sup>15</sup> used a “no additional  
treatment” control (both groups received an exercise program) but all study arms  
improved over time. This may be because a high proportion of control study  
participants actually received RD (~30%) due to cross-over during the trial. However,  
this may also be explained by self-selection of participants who volunteer for  
research trials,<sup>35</sup> and hence are likely to make more of an active effort to manage  
their back pain. Such participants may be more likely to engage with, and be diligent  
in, exercise programs and seek medical assistance where needed.

In the trial by Juch et al., control group improvements may also be explained by the  
conservative management that they received. The exercise program employed was  
multi-disciplinary and comprised individual sessions over 8-12 hours focused on  
quality of movement and behaviour, with access to psychological care. There is  
evidence suggesting that patients with chronic back pain can benefit from pain  
management programs that are of sufficient quality and duration.<sup>36</sup> Where patients  
have not received an adequate trial of conservative therapy, they may benefit from  
further exercise programs and other conservative management. It remains unclear

1  
2  
3 whether patients who are either unable or unwilling to engage with conservative  
4 approaches to pain management would benefit from RD based interventions as a  
5 first-line or isolated modality of treatment. Hence, there should be some reservation  
6 when considering the use of RD treatment as a first-line, or isolated modality of pain  
7 management.  
8  
9

10  
11  
12 Regression to the mean may also have played a role in control group improvements  
13 since patients in the trial were recruited with elevated pain, responsive to an  
14 anaesthetic block. Back pain has been shown to have a varied aetiology, with some  
15 patients experiencing fluctuating levels of pain over time, whilst other experience  
16 constant high levels of pain.<sup>37,38</sup> For the majority of trials that reported it, duration of  
17 back pain in participants prior to enrolment was 2-5 years and a proportion of these  
18 were likely to have had high levels of constant pain. Some, however, may have been  
19 experiencing fluctuating or recurrent pain within this period since the actual inclusion  
20 criteria for most trials was pain for >3 or 6 months based on patient recall. If they  
21 were recruited at a point where their pain had flared acutely, there would be a natural  
22 tendency for that painful episode to resolve over time.  
23  
24  
25  
26  
27  
28  
29  
30  
31  
32  
33  
34  
35  
36  
37  
38  
39

#### 40 41 *Strengths and limitations*

42  
43 A major strength of this review is that it collates a larger body of evidence than  
44 previous systematic reviews, with the addition of a number of recent trials and  
45 thorough assessment of the quality of the evidence. The review is able to tentatively  
46 answer the question about the effectiveness of RD for back pain; an assertion that,  
47 to date, has proved to be very difficult due a paucity of evidence in this field.  
48  
49  
50  
51  
52  
53  
54

55 This review utilises evidence from a previous Cochrane review<sup>11</sup> but the inclusion  
56 criteria for our review had a narrower scope (included only sham- or conservative  
57  
58  
59  
60

1  
2  
3 management-controlled trials of conventional neuro-ablative RD). Since the previous  
4 review appears to be of high quality, and we updated it with a thorough search of the  
5 literature to date, there is assurance that all relevant trials were included.  
6  
7  
8  
9

10 A limitation of this review is that it was difficult to truly assess risk of bias in trials  
11 included in the review. Trial integrity rested heavily on the blinding of participants and  
12 the outcome was likely to be highly subject to patients' preconceptions of the  
13 different interventions given. Most trials did not report information that providers gave  
14 patients about the different possible treatment arms e.g. did providers suggest to  
15 patients that RD was the effective treatment and that sham or no treatment would be  
16 ineffective? Where blinding was broken, these viewpoints may have influenced  
17 patients' response. In some of the sham-controlled studies this was clearly evident.  
18 For example, in some studies, before randomisation, patients were told that, if  
19 randomised to sham, they could receive RD if they gained no benefit. Where blinding  
20 was broken, these opinions were likely to influence patients' perception of their pain.  
21 In other studies information from providers was not reported and it is difficult to  
22 assess whether this type of bias occurred.  
23  
24  
25  
26  
27  
28  
29  
30  
31  
32  
33  
34  
35  
36  
37  
38  
39  
40

41 The review may also be limited in its ability to ascertain the technical quality of  
42 individual research trials. Even when examining the reported trial methodology, it is  
43 difficult to conclusively identify trials that employed procedures that may be more or  
44 less successful in denervating the specific lumbosacral anatomy. Some aspects of  
45 RD procedures in earlier trials are considered outdated<sup>39,40</sup> but the advantages of  
46 more recent procedures for RD remain unproven, and there is no clear evidence of  
47 their superiority. Sensitivity analysis based on technical quality was therefore  
48 considered unhelpful and not performed.  
49  
50  
51  
52  
53  
54  
55  
56  
57  
58  
59  
60

1  
2  
3 The review is also limited by the lack of long term data from trials. Most studies do  
4 not attempt to blind patients for more than 3 months and the longer follow up  
5 outcomes are considered to be at higher risk of bias. It is still therefore unclear  
6 whether RD of lumbosacral anatomy has long-term benefits for back pain.  
7  
8  
9  
10  
11

12  
13 Finally, the review is limited in its ability to identify any aspects of patient or  
14 intervention characteristics that may make RD treatment more likely to be beneficial.  
15

16  
17 There is to date no reliable predictor of benefit on back pain for RD procedures  
18 based on clinical or imaging findings or diagnostic injections.<sup>41</sup> The relative  
19 advantages of different RD technologies used in included trials (e.g. 'cooled'<sup>25,26,32</sup>  
20 and 'bipolar'<sup>30,32</sup> RD) remains to be established. Due to the small number of studies  
21 at each time point, sub-group analysis was not considered appropriate. However, the  
22 publication of more sham-controlled trials and trials comparing different RD  
23 technologies may make this type of investigation possible. Technical advances and  
24 advances in knowledge and experience may allow for better selection of anatomical  
25 targets and patients for RD and hence improve clinical outcomes. It is important that  
26 these developments are formally assessed and published.  
27  
28  
29  
30  
31  
32  
33  
34  
35  
36  
37  
38  
39  
40

41 In conclusion, within the limitations in this review and the published literature, there  
42 appears to be at least short-term benefit from RD of selected lumbosacral  
43 anatomical targets for chronic back pain. However, the mean size of effect appears  
44 to be small and, overall, clinical significance may be marginal. Hence, chronic back  
45 pain remains a highly challenging condition to treat.  
46  
47  
48  
49  
50  
51  
52  
53  
54  
55  
56  
57  
58  
59  
60

1  
2  
3 **Acknowledgements** Thanks to Julie Aikens and Kerry Herbert at Hinchingsbrooke  
4  
5 Healthcare Library for their assistance in designing and running the search strategies  
6  
7 for the review.  
8  
9

10 **Contributors:** MC contributed to the planning of this work, selected articles for  
11  
12 inclusion, extracted data, quality assessed studies and drafted and re-drafted the  
13  
14 manuscript. RL contributed to the planning of this work, reviewed the manuscript and  
15  
16 approved the final version. PT extracted data from the trials, reviewed the  
17  
18 manuscript and approved the final version. MA contributed to the planning of this  
19  
20 work, reviewed the manuscript and approved the final version. ML contributed to the  
21  
22 planning of this work, reviewed the manuscript and approved the final version.  
23  
24  
25

26  
27 **Funding** This research received no specific grant from any funding agency in the  
28  
29 public, commercial or not-for-profit sectors. RL is supported by the Medical Research  
30  
31 Council (MC\_UU\_12015/2). MCL is supported by AABGI Foundation project grant  
32  
33 (RCZB/071).  
34  
35

36  
37 **Competing interests** None declared.  
38

39  
40 **Patient consent for publication** Not required.  
41

42  
43 **Provenance and peer review** Not commissioned; externally peer reviewed.  
44

45  
46 **Data availability statement** All data relevant to the study are included in the article  
47  
48 or uploaded as supplementary information.  
49

50  
51 **Patient and Public Involvement** This research was done without patient  
52  
53 involvement.  
54

55  
56 **Open access** This is an open access article distributed in accordance with the  
57  
58 Creative Commons Attribution Non Commercial (CC BY-NC 4.0) license, which  
59  
60 permits others to distribute, remix, adapt, build upon this work non-commercially, and

1  
2  
3 license their derivative works on different terms, provided the original work is  
4 properly cited, appropriate credit is given, any changes made indicated, and the use  
5 is non-commercial. See: <http://creativecommons.org/licenses/by-nc/4.0/>.  
6  
7  
8  
9

## 10 References

- 11  
12  
13 1 Hartvigsen J, Hancock MJ, Kongsted A, *et al*. What low back pain is and why  
14 we need to pay attention. *Lancet* 2018;**391**:2356–67. doi:10.1016/S0140-  
15 6736(18)30480-X  
16  
17  
18  
19
- 20  
21 2 Hoy D, Bain C, Williams G, *et al*. A systematic review of the global prevalence  
22 of low back pain. *Arthritis Rheum* 2012;**64**:2028–37. doi:10.1002/art.34347  
23  
24  
25
- 26  
27 3 Maniadakis N, Gray A. The economic burden of back pain in the UK. *Pain*  
28 2000;**84**:95–103. doi:10.1016/S0304-3959(99)00187-6  
29  
30
- 31  
32 4 Dagenais S, Caro J, Haldeman S. A systematic review of low back pain cost of  
33 illness studies in the United States and internationally. *Spine J* 2008;**8**:8–20.  
34 doi:10.1016/j.spinee.2007.10.005  
35  
36  
37
- 38  
39 5 National Institute of Health and Care Excellence. Low back pain and sciatica in  
40 over 16s: assessment and management. 2016.  
41  
42
- 43  
44 6 Chou R, Baisden J, Carragee EJ, *et al*. Surgery for Low Back Pain: A Review  
45 of the Evidence for an American Pain Society Clinical Practice Guideline.  
46 *Spine (Phila Pa 1976)* 2009;**34**:1094–109.  
47  
48
- 49  
50  
51 7 Chou R, Loeser JD, Owens DK, *et al*. Interventional Therapies, Surgery, and  
52 Interdisciplinary Rehabilitation for Low Back Pain: An Evidence-Based Clinical  
53 Practice Guideline From the American Pain Society. *Spine (Phila Pa 1976)*  
54 2009;**34**:1066–77. doi:10.1097/BRS.0b013e3181a1390d  
55  
56  
57  
58  
59  
60



- 1  
2  
3 8 Kline M. Radiofrequency techniques in clinical practice. In: *Waldman SD,*  
4 *Winnie AP, eds. Interventional Pain Management. Philadelphia, PA: Saunders.*  
5  
6 *1996.*  
7  
8  
9  
10 9 Wray JK, Dixon B, Przkora R. *Radiofrequency Ablation.* 2019.  
11  
12  
13 10 Manchikanti L, Hirsch J, Pampati V, *et al.* Utilization of Facet Joint and  
14 Sacroiliac Joint Interventions in Medicare Population from 2000 to 2014:  
15 Explosive Growth Continues! *Curr Pain Headache Rep* 2016;**20**:58.  
16  
17  
18  
19  
20 11 Maas E, Ostelo R, Niemisto L, *et al.* Radiofrequency denervation for chronic  
21 low back pain. *Cochrane Database Syst Rev* 2015;:Art. No.: CD008572.  
22 doi:10.1001/jama.2017.16386  
23  
24  
25  
26  
27 12 Brandon R, Cohen D, Edward T, *et al.* Pulsed Radiofrequency  
28 Neuromodulation in Interventional Pain Management—A Growing Technology.  
29 *J Radiol Nurs* 2018;**37**:181–7.  
30  
31  
32  
33 13 Schünemann H, Brożek J, Guyatt G, *et al.*, editors. *GRADE Handbook:*  
34 *Handbook for grading the quality of evidence and the strength of*  
35 *recommendations using the GRADE approach.*  
36  
37  
38  
39  
40  
41  
42 14 Higgins JP, Savovic J, Page MJ, *et al.*, editors. *Revised Cochrane risk-of-bias*  
43 *tool for randomized trials (RoB 2).* 2019.  
44  
45  
46  
47 15 Juch JNS, Maas ET, Ostelo RWJG, *et al.* Effect of Radiofrequency  
48 Denervation on Pain Intensity Among Patients With Chronic Low Back Pain.  
49 *JAMA* 2017;**318**:68–81.  
50  
51  
52  
53  
54  
55 16 Review Manager (RevMan) [Computer program]. Version 5.3. Copenhagen:  
56 The Nordic Cochrane Centre, The Cochrane Collaboration, 2014.  
57  
58  
59  
60

- 1  
2  
3 17 Gallagher J, Petriccione di Vadi P, Wedley J, *et al.* Radiofrequency facet joint  
4 denervation in the treatment of low back pain: a prospective controlled double-  
5 blind study to assess its efficacy. *Pain Clin* 1994;**7**:193–8.  
6  
7  
8  
9  
10 18 Leclaire R, Fortin L, Lambert R, *et al.* Radiofrequency Facet Joint Denervation  
11 in the Treatment of Low Back Pain: A Placebo-Controlled Clinical Trial to  
12 Assess Efficacy. *Spine (Phila Pa 1976)* 2001;**26**:1411–6.  
13  
14  
15  
16  
17  
18  
19  
20  
21 19 Moussa WMM, Khedr W. Percutaneous radiofrequency facet capsule  
22 denervation as an alternative target in lumbar facet syndrome. *Clin Neurol*  
23  
24  
25  
26  
27  
28 20 van Kleef M, Barendse GAM, Kessels A, *et al.* Randomised trial of  
29 radiofrequency lumbar facet denervation for chronic low back pain. *Spine*  
30  
31  
32  
33  
34  
35 21 Van Tilburg CWJ, Schuurmans FA, Stronks DL, *et al.* Randomized sham-  
36 controlled double-blind multicenter clinical trial to ascertain the effect of  
37 percutaneous radiofrequency treatment for sacroiliac joint pain: Three-month  
38 results. *Clin J Pain* 2016;**32**:921–6. doi:10.1097/AJP.0000000000000351  
39  
40  
41  
42  
43  
44  
45 22 Van Wijk RMAW, Geurts JWM, Wynne HJ, *et al.* Radiofrequency denervation  
46 of lumbar facet joints in the treatment of chronic low back pain: A randomized,  
47 double-blind, sham lesion-controlled trial. *Clin J Pain* 2005;**21**:335–44.  
48  
49  
50  
51  
52 23 Nath S, Nath CA, Pettersson K. Percutaneous Lumbar Zygapophysial (Facet)  
53 Joint Neurotomy Using Radiofrequency Current, in the Management of  
54 Chronic Low Back Pain. *Spine (Phila Pa 1976)* 2008;**33**:1291–1297.  
55  
56  
57  
58  
59  
60

- 1  
2  
3 24 Tekin I, Mirzai H, Ok G, *et al.* A comparison of conventional and pulsed  
4 radiofrequency denervation in the treatment of chronic facet joint pain. *Clin J*  
5 *Pain* 2007;**23**:524–9. doi:10.1097/AJP.0b013e318074c99c  
6  
7  
8  
9  
10 25 Cohen SP, Hurley RW, Buckenmaier CC, *et al.* Randomized Placebo-  
11 Controlled Study Evaluating Lateral Branch Radiofrequency Denervation for  
12 Sacroiliac Joint Pain. *Anesthesiology* 2008;**109**:279–88.  
13  
14  
15  
16  
17 doi:10.1038/mp.2011.182.doi  
18  
19  
20 26 Patel N, Gross A, Brown L, *et al.* A Randomized, Placebo-Controlled Study to  
21 Assess the Efficacy of Lateral Branch Neurotomy for Chronic Sacroiliac Joint  
22 Pain. *Pain Med* 2012;**13**:383–98. doi:10.1111/j.1526-4637.2012.01328.x  
23  
24  
25  
26  
27 27 Van Tilburg C, Stronks D, Groeneweg J, *et al.* Randomised sham-controlled  
28 double-blind multicentre clinical trial to ascertain the effect of percutaneous  
29 radiofrequency treatment for lumbar facet joint pain. *Spine (Phila Pa 1976)*  
30 2016;**98-B**:1526–33.  
31  
32  
33  
34  
35  
36  
37 28 Mehta V, Poply K, Husband M, *et al.* The Effects of Radiofrequency  
38 Neurotomy Using a Strip-Lesioning Device on Patients with Sacroiliac Joint  
39 Pain: Results from a Single-Center, Randomized, Sham-Controlled Trial. *Pain*  
40 *Physician* 2018;**21**:607–18.  
41  
42  
43  
44  
45  
46  
47 29 Barendse GAM, van den Berg SGM, Kessels AHF, *et al.* Randomized  
48 Controlled Trial of Percutaneous Intradiscal Radiofrequency  
49 Thermocoagulation for Chronic Discogenic Back Pain. Lack of Effect From a  
50 90-Second 70 C Lesion. *Spine (Phila Pa 1976)* 2001;**26**:287–92.  
51  
52  
53  
54  
55  
56  
57 doi:10.1097/00007632-200102010-00014  
58  
59 30 Kapural L, Vrooman B, Sarwar S, *et al.* A Randomized, Placebo-Controlled  
60

- 1  
2  
3 Trial of Transdiscal Radiofrequency, Biacuplasty for Treatment of Discogenic  
4 Lower Back Pain. *Pain Med* 2013;**14**:362–73. doi:10.1111/pme.12023  
5  
6  
7  
8  
9 31 van Tilburg CWJ, Stronks DL, Groeneweg JG, *et al*. Randomized sham-  
10 controlled, double-blind, multicenter clinical trial on the effect of percutaneous  
11 radiofrequency at the ramus communicans for lumbar disc pain. *Eur J Pain*  
12 2017;**21**:520–9. doi:10.1002/ejp.945  
13  
14  
15  
16  
17 32 Desai MJ, Kapural L, Petersohn JD, *et al*. A prospective, randomized,  
18 multicenter, open-label clinical trial comparing intradiscal biacuplasty to  
19 conventional medical management for discogenic lumbar back pain. *Spine*  
20 *(Phila Pa 1976)* 2016;**41**:1065–74. doi:10.1097/BRS.0000000000001412  
21  
22  
23  
24  
25  
26  
27 33 Kvarstein G, Måwe L, Indahl A, *et al*. A randomized double-blind controlled trial  
28 of intra-annular radiofrequency thermal disc therapy - A 12-month follow-up.  
29  
30  
31  
32  
33  
34  
35  
36 34 Fischgrund JS, Rhyne A, Franke J, *et al*. Intraosseous basivertebral nerve  
37 ablation for the treatment of chronic low back pain: a prospective randomized  
38 double-blind sham-controlled multi-center study. *Eur Spine J* 2018;**27**:1146–  
39  
40  
41  
42  
43  
44  
45 35 The Cochrane Collaboration. Introduction to sources of bias in clinical trials. In:  
46  
47  
48  
49  
50 36 Morley S, Williams A, Hussain S. Estimating the clinical effectiveness of  
51 cognitive behavioural therapy in the clinic: Evaluation of a CBT informed pain  
52 management programme. *Pain* 2008;**137**:670–80.  
53  
54  
55  
56  
57 37 Dunn K, Croft P. Epidemiology and natural history of low back pain. *Eura*  
58  
59  
60  
*Medicophys* 2004;**40**:9–13.

- 1  
2  
3 38 Dunn K, Jordan K, Croft P. Characterizing the course of low back pain: a latent  
4 class analysis. *Am J Epidemiol* 2006;**63**:754–61.  
5  
6  
7  
8 39 Dreyfuss P, Baker R. Comment on: Radiofrequency facet joint denervation in  
9 the treatment of low back pain: a placebo-controlled clinical trial to assess  
10 efficacy. *Spine (Phila Pa 1976)* 2002;**27**:556–7.  
11  
12  
13  
14  
15 40 Kapural L, Provenzano D, Narouze S. RE: Juch JNS, et al. Effect of  
16 Radiofrequency Denervation on Pain Intensity Among Patients With Chronic  
17 Low Back Pain: The Mint Randomized Clinical Trials. *JAMA* 2017;**318**(1):68–  
18 81. *Neuromodulation* 2017;**20**:844. doi:10.1111/ner.12729  
19  
20  
21  
22  
23  
24  
25 41 Cohen SP, Julie JH, Brummett C. Facet joint pain-advances in patient  
26 selection and treatment. *Nat Rev Rheumatol* 2013;**9**:101–16.  
27  
28  
29  
30  
31  
32  
33  
34  
35  
36  
37  
38  
39  
40  
41  
42  
43  
44  
45  
46  
47  
48  
49  
50  
51  
52  
53  
54  
55  
56  
57  
58  
59  
60

**Table 1** Results of the meta-analyses of randomised controlled trials

|                                              | All trials |     |                         |                |          | Sham controlled trials |     |                         |                |          |
|----------------------------------------------|------------|-----|-------------------------|----------------|----------|------------------------|-----|-------------------------|----------------|----------|
|                                              | k          | N   | MD (95% CI)             | I <sup>2</sup> | GRADE*   | k                      | N   | MD (95% CI)             | I <sup>2</sup> | GRADE*   |
| <b>RD of the facet joints</b>                |            |     |                         |                |          |                        |     |                         |                |          |
| <b>1-3 months</b>                            | 7          | 599 | -0.56<br>(-1.13, 0.01)  | 59%            | Low      | 6                      | 348 | -0.63<br>(-1.39, 0.12)  | 66%            | Low      |
| <b>6 months</b>                              | 4          | 361 | -0.66<br>(-1.37, 0.05)  | 42%            | Low      | 3                      | 110 | -1.05<br>(-2.21, 0.10)  | 32%            | Low      |
| <b>1 year</b>                                | 2          | 291 | -0.72<br>(-2.24, 0.80)  | 89%            | Very low | 1                      | 40  | -1.50<br>(-2.21, -0.79) | NA             | Very low |
| <b>RD of the sacroiliac joints</b>           |            |     |                         |                |          |                        |     |                         |                |          |
| <b>1-3 months</b>                            | 5          | 384 | -1.53<br>(-2.62, -0.45) | 83%            | Low      | 4                      | 156 | -1.89<br>(-3.45, -0.34) | 87%            | Very low |
| <b>6 months</b>                              | 1          | 228 | -0.28<br>(-1.00, 0.44)  | NA             | Low      |                        |     |                         |                |          |
| <b>12 months</b>                             | 1          | 228 | -0.19<br>(-0.92, 0.54)  | NA             | Low      |                        |     |                         |                |          |
| <b>RD of the intervertebrae discs</b>        |            |     |                         |                |          |                        |     |                         |                |          |
| <b>1-3 months</b>                            | 4          | 200 | -0.98<br>(-1.84, -0.12) | 40%            | Low      | 3                      | 144 | -0.63<br>(-1.36, 0.10)  | 0%             | Low      |
| <b>6 months</b>                              | 3          | 127 | -1.74<br>(-2.58, -0.91) | 0%             | Low      | 2                      | 75  | -1.63<br>(-2.58, -0.68) | 0%             | Low      |
| <b>12 months</b>                             | 1          | 20  | -1.70<br>(-3.63, 0.23)  | NA             | Very low | 1                      | 20  | -1.70<br>(-3.63, 0.23)  | NA             | Very low |
| <b>RD of the vertebrae body and endplate</b> |            |     |                         |                |          |                        |     |                         |                |          |
| <b>3 months</b>                              | 1          | 205 | -0.34<br>(-1.09, 0.41)  | NA             | Moderate | 1                      | 205 | -0.34<br>(-1.09, 0.41)  | NA             | Moderate |
| <b>6 months</b>                              | 1          | 205 | -0.67<br>(-1.44, 0.10)  | NA             | Moderate | 1                      | 205 | -0.67<br>(-1.44, 0.10)  | NA             | Moderate |
| <b>12 months</b>                             | 1          | 205 | -0.50<br>(-1.29, 0.29)  | NA             | Moderate | 1                      | 205 | -0.50<br>(-1.29, 0.29)  | NA             | Moderate |

k, number of trials; N, number of participants; MD, Mean difference.

\*GRADE assessment of the quality of the evidence

**Figure 1** PRISMA flow diagram

**Figure 2** Post treatment pain score for radiofrequency denervation of the facet joints versus control at 1-3 month follow-up (longest time point used for studies with multiple time points)

**Figure 3** Post treatment pain score for radiofrequency denervation of the sacroiliac joints versus control at 1-3 month follow-up (longest time point used for studies with multiple time points)

**Figure 4** Post treatment pain score for radiofrequency denervation of the intervertebral discs versus control at 1-3 month follow-up (longest time point used for studies with multiple time points)

1  
2  
3  
4  
5  
6  
7  
8  
9  
10  
11  
12  
13  
14  
15  
16  
17  
18  
19  
20  
21  
22  
23  
24  
25  
26  
27  
28  
29  
30  
31  
32  
33  
34  
35  
36  
37  
38  
39  
40  
41  
42  
43  
44  
45  
46  
47  
48  
49  
50  
51  
52  
53  
54  
55  
56  
57  
58  
59  
60



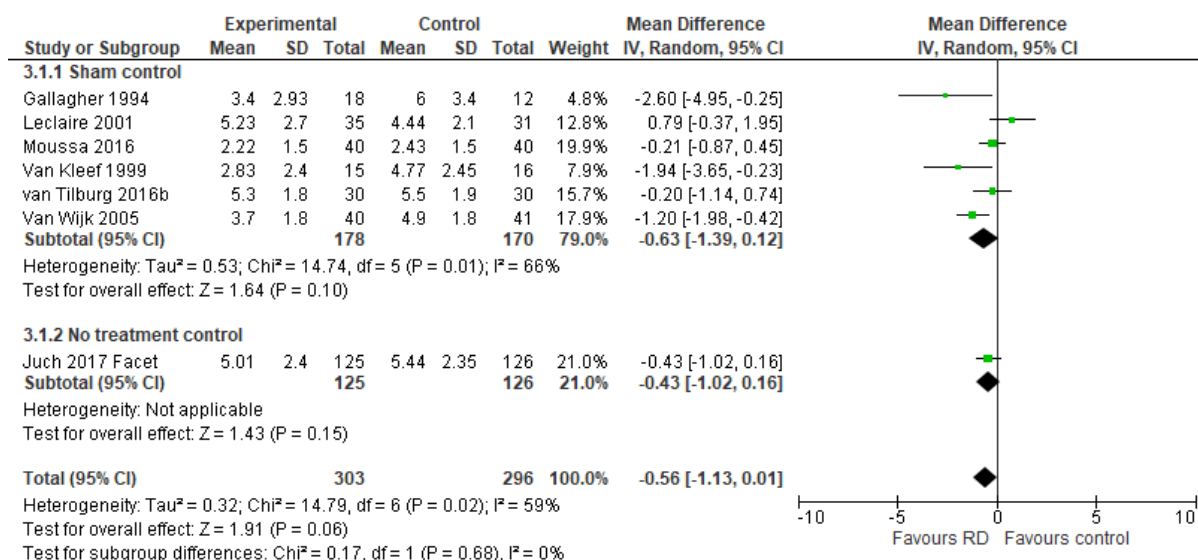



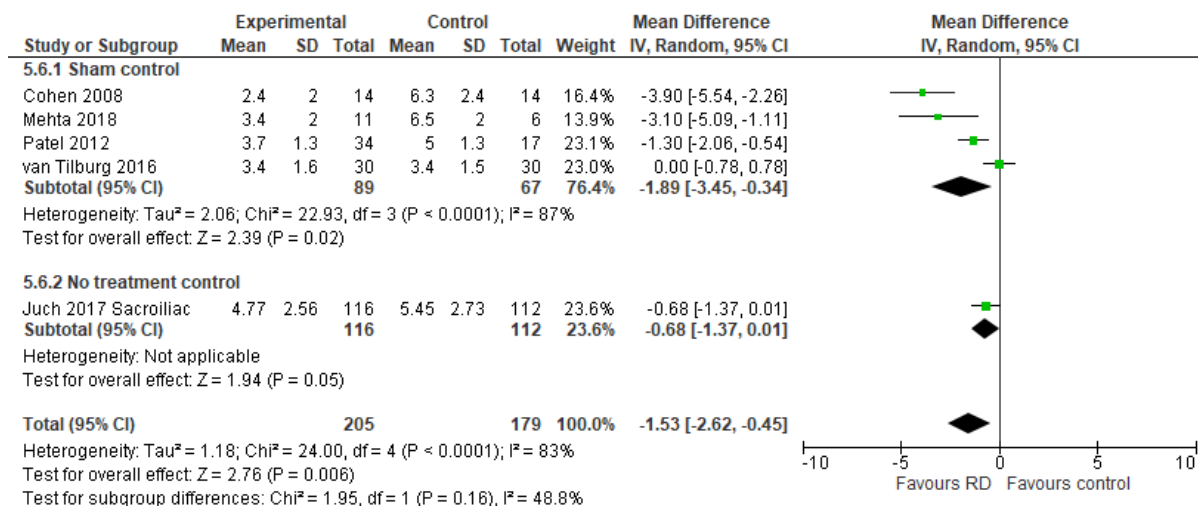

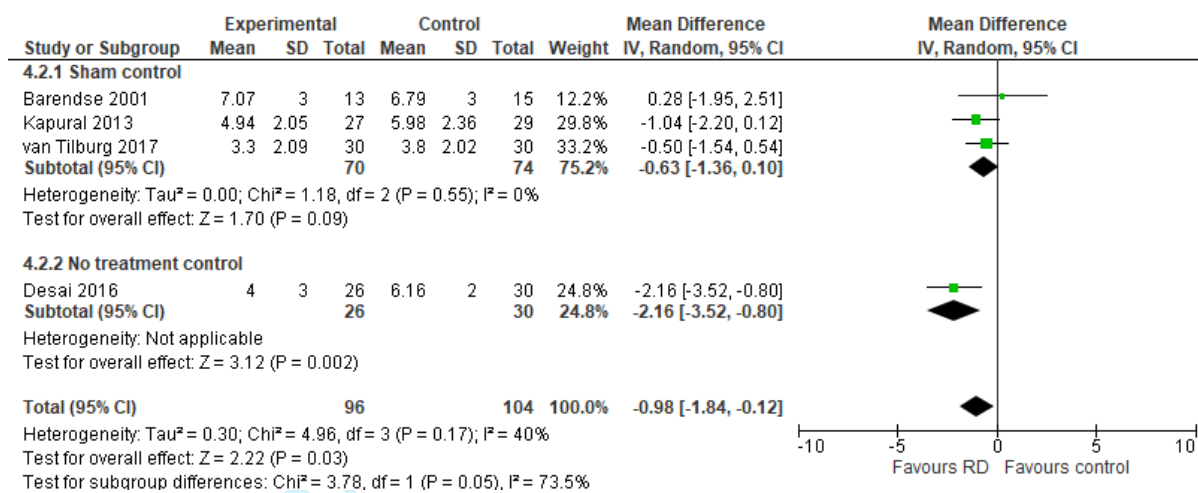

## Appendix 1 Search strategies

### Medline and Embase

| #  | Database | Search term                            |
|----|----------|----------------------------------------|
| 1  | Medline  | (randomized controlled trial).pt       |
| 2  | Medline  | (controlled clinical trial).pt         |
| 3  | Medline  | (randomi*ed).ab                        |
| 4  | Medline  | (placebo).ti,ab                        |
| 5  | Medline  | (drug therapy).fs                      |
| 6  | Medline  | (randomly).ti,ab                       |
| 7  | Medline  | (trial).ti,ab                          |
| 8  | Medline  | (groups).ti,ab                         |
| 9  | Medline  | (1 OR 2 OR 3 OR 4 OR 5 OR 6 OR 7 OR 8) |
| 10 | Medline  | (animals NOT (humans AND animals)).su  |
| 11 | Medline  | 9 not 10                               |
| 12 | Medline  | (dorsalgia).ti,ab                      |
| 13 | Medline  | exp "BACK PAIN"/                       |
| 14 | Medline  | (backache).ti,ab                       |
| 15 | Medline  | (lumbar ADJ pain).ti,ab                |
| 16 | Medline  | (coccyx).ti,ab                         |
| 17 | Medline  | (coccydynia).ti,ab                     |
| 18 | Medline  | (sciatica).ti,ab                       |
| 19 | Medline  | "SCIATIC NEUROPATHY"/                  |

- 1  
2  
3 20 Medline (spondylosis).ti,ab  
4  
5  
6 21 Medline (lumbago).ti,ab  
7  
8 22 Medline (12 OR 13 OR 14 OR 15 OR 16 OR 17 OR 18 OR 19 OR 20  
9 OR 21)  
10  
11  
12 23 Medline exp SPINE/  
13  
14 24 Medline (discitis).ti,ab  
15  
16  
17 25 Medline exp "SPINAL DISEASES"/  
18  
19 26 Medline (disc ADJ degeneration).ti,ab  
20  
21  
22 27 Medline (disc ADJ prolapse).ti,ab  
23  
24  
25 28 Medline (disc ADJ herniation).ti,ab  
26  
27 29 Medline (spinal fusion).su  
28  
29  
30 30 Medline (facet ADJ joints).ti,ab  
31  
32  
33 31 Medline (intervertebral disc).su  
34  
35 32 Medline (postlaminectomy).ti,ab  
36  
37  
38 33 Medline (arachnoiditis).ti,ab  
39  
40  
41 34 Medline (failed ADJ back).ti,ab  
42  
43 35 Medline (23 OR 24 OR 25 OR 26 OR 27 OR 28 OR 29 OR 30 OR 31  
44 OR 32 OR 33 OR 34)  
45  
46 36 Medline (22 OR 35)  
47  
48  
49 37 Medline exp "RADIO WAVES"/  
50  
51 38 Medline exp "PULSED RADIOFREQUENCY TREATMENT"/  
52  
53  
54 39 Medline (radiofrequency).af  
55  
56  
57 40 Medline (radio frequency).af  
58  
59  
60

|    |    |                                                        |
|----|----|--------------------------------------------------------|
| 1  |    |                                                        |
| 2  |    |                                                        |
| 3  | 41 | Medline exp ELECTROCOAGULATION/                        |
| 4  |    |                                                        |
| 5  | 42 | Medline (electrocoag*).af                              |
| 6  |    |                                                        |
| 7  |    |                                                        |
| 8  | 43 | Medline (thermocoag*).af                               |
| 9  |    |                                                        |
| 10 |    |                                                        |
| 11 | 44 | Medline neurotom* OR (neuroly*).af                     |
| 12 |    |                                                        |
| 13 | 45 | Medline (37 OR 38 OR 39 OR 40 OR 41 OR 42 OR 43 OR 44) |
| 14 |    |                                                        |
| 15 |    |                                                        |
| 16 | 46 | Medline (11 AND 36 AND 45)                             |
| 17 |    |                                                        |
| 18 | 47 | EMBASE "CLINICAL TRIAL"/                               |
| 19 |    |                                                        |
| 20 |    |                                                        |
| 21 | 48 | EMBASE "CONTROLLED CLINICAL TRIAL"/                    |
| 22 |    |                                                        |
| 23 |    |                                                        |
| 24 | 49 | EMBASE "CONTROLLED STUDY"/                             |
| 25 |    |                                                        |
| 26 |    |                                                        |
| 27 | 50 | EMBASE "RANDOMIZED CONTROLLED TRIAL"/                  |
| 28 |    |                                                        |
| 29 |    |                                                        |
| 30 | 51 | EMBASE "DOUBLE BLIND PROCEDURE"/                       |
| 31 |    |                                                        |
| 32 | 52 | EMBASE "SINGLE BLIND PROCEDURE"/                       |
| 33 |    |                                                        |
| 34 |    |                                                        |
| 35 | 53 | EMBASE "CROSSOVER PROCEDURE"/                          |
| 36 |    |                                                        |
| 37 |    |                                                        |
| 38 | 54 | EMBASE PLACEBO/                                        |
| 39 |    |                                                        |
| 40 | 55 | EMBASE (allocat*).ti,ab                                |
| 41 |    |                                                        |
| 42 | 56 | EMBASE (assign*).ti,ab                                 |
| 43 |    |                                                        |
| 44 |    |                                                        |
| 45 | 57 | EMBASE (blind*).ti,ab                                  |
| 46 |    |                                                        |
| 47 |    |                                                        |
| 48 | 58 | EMBASE (clinic* ADJ25 (study OR trial)).ti,ab          |
| 49 |    |                                                        |
| 50 | 59 | EMBASE (crossover OR cross-over).ti,ab                 |
| 51 |    |                                                        |
| 52 |    |                                                        |
| 53 | 60 | EMBASE (factorial*).ti,ab                              |
| 54 |    |                                                        |
| 55 |    |                                                        |
| 56 | 61 | EMBASE (followup OR follow-up).ti,ab                   |
| 57 |    |                                                        |
| 58 | 62 | EMBASE (prospectiv*).ti,ab                             |
| 59 |    |                                                        |
| 60 |    |                                                        |

- 1  
2  
3 63 EMBASE (placebo\*).ti,ab  
4  
5  
6 64 EMBASE (random\*).ti,ab  
7  
8 65 EMBASE ((singl\* OR doubl\* OR trebl\* OR trip\*) ADJ25 (blind\* OR  
9 mask\*)).ti,ab  
10  
11  
12 66 EMBASE (volunteer\*).ti,ab  
13  
14 67 EMBASE (47 OR 48 OR 49 OR 50 OR 51 OR 52 OR 53 OR 54 OR 55  
15 OR 56 OR 57 OR 58 OR 59 OR 60 OR 61 OR 62 OR 63 OR  
16 64 OR 65 OR 66)  
17  
18  
19 68 EMBASE exp animals/ or exp invertebrate/ or animal experiment/ or  
20 animal model/ or animal tissue/ or animal cell/ or nonhuman/  
21  
22 69 EMBASE exp ANIMALS/  
23  
24  
25 70 EMBASE exp INVERTEBRATE/  
26  
27  
28 71 EMBASE ANIMAL EXPERIMENT/  
29  
30  
31 72 EMBASE ANIMAL MODEL/  
32  
33 73 EMBASE ANIMAL TISSUE/  
34  
35  
36 74 EMBASE ANIMAL CELL/  
37  
38  
39 75 EMBASE NONHUMAN/  
40  
41 76 EMBASE 71 or 72 or 73 or 74 or 75  
42  
43  
44 77 EMBASE exp ANIMALS/  
45  
46  
47 78 EMBASE exp INVERTEBRATE/  
48  
49 79 EMBASE (76 OR 77 OR 78)  
50  
51 80 EMBASE 77 or 78  
52  
53  
54 81 EMBASE HUMAN/ OR NORMAL HUMAN/ OR HUMAN CELL/  
55  
56  
57 82 EMBASE (76 AND 77 AND 78 AND 81)  
58  
59  
60

- 1  
2  
3 83 EMBASE (dorsalgia).ti,ab  
4  
5  
6 84 EMBASE (back pain).ti,ab  
7  
8 85 EMBASE exp BACKACHE/  
9  
10  
11 86 EMBASE (lumbar ADJ pain).ti,ab  
12  
13  
14 87 EMBASE (coccyx).ti,ab  
15  
16 88 EMBASE (coccydynia).ti,ab  
17  
18  
19 89 EMBASE (sciatica).ti,ab  
20  
21 90 EMBASE ISCHIALGIA/  
22  
23  
24 91 EMBASE (spondylosis).ti,ab  
25  
26 92 EMBASE (lumbago).ti,ab  
27  
28  
29 93 EMBASE (back disorder\*).ti,ab  
30  
31  
32 94 EMBASE (83 OR 84 OR 85 OR 86 OR 87 OR 88 OR 89 OR 90 OR 91  
33 OR 92 OR 93)  
34  
35 95 EMBASE exp SPINE/  
36  
37  
38 96 EMBASE (discitis OR diskitis).ti,ab  
39  
40  
41 97 EMBASE exp "SPINE DISEASE"/  
42  
43 98 EMBASE (disc ADJ degeneration).ti,ab  
44  
45  
46 99 EMBASE (disc ADJ prolapse).ti,ab  
47  
48  
49 100 EMBASE (disc ADJ herniation).ti,ab  
50  
51 101 EMBASE (spinal fusion).ti,ab  
52  
53  
54 102 EMBASE (facet ADJ joints).ti,ab  
55  
56 103 EMBASE (intervertebral disk OR Intervertebral disc).ti,ab  
57  
58  
59 104 EMBASE (postlaminectomy).ti,ab  
60

|    |     |                                                            |
|----|-----|------------------------------------------------------------|
| 1  |     |                                                            |
| 2  |     |                                                            |
| 3  | 105 | EMBASE (arachnoiditis).ti,ab                               |
| 4  |     |                                                            |
| 5  | 106 | EMBASE (failed ADJ back).ti,ab                             |
| 6  |     |                                                            |
| 7  |     |                                                            |
| 8  | 107 | EMBASE (95 OR 96 OR 97 OR 98 OR 99 OR 100 OR 101 OR 102 OR |
| 9  |     | 103 OR 104 OR 105 OR 106)                                  |
| 10 |     |                                                            |
| 11 | 108 | EMBASE 94 or 107                                           |
| 12 |     |                                                            |
| 13 |     |                                                            |
| 14 | 109 | EMBASE exp PULSED RADIOFREQUENCY TREATMENT/                |
| 15 |     |                                                            |
| 16 |     |                                                            |
| 17 | 110 | EMBASE exp RADIOFREQUENCY/                                 |
| 18 |     |                                                            |
| 19 | 111 | EMBASE exp RADIOFREQUENCY RADIATION/                       |
| 20 |     |                                                            |
| 21 |     |                                                            |
| 22 | 112 | EMBASE (radiofrequency OR radio-frequency).ti,ab           |
| 23 |     |                                                            |
| 24 |     |                                                            |
| 25 | 113 | EMBASE exp THERMOCOAGULATION/ OR thermocoag*               |
| 26 |     |                                                            |
| 27 | 114 | EMBASE exp ELECTROCOAGULATION/ OR electrocoag*             |
| 28 |     |                                                            |
| 29 |     |                                                            |
| 30 | 115 | EMBASE (neurotom* OR neuroly*).ti,ab                       |
| 31 |     |                                                            |
| 32 | 116 | EMBASE (109 OR 110 OR 111 OR 112 OR 113 OR 114 OR 115)     |
| 33 |     |                                                            |
| 34 |     |                                                            |
| 35 | 117 | EMBASE (108 AND 116)                                       |
| 36 |     |                                                            |
| 37 |     |                                                            |
| 38 | 118 | Medline 46 [DT 2014-2019]                                  |
| 39 |     |                                                            |
| 40 |     |                                                            |
| 41 |     |                                                            |

### Medline in process

| # | Database | Search term                           |
|---|----------|---------------------------------------|
| 1 | Medline  | ("randomi*ed controlled trial").ti,ab |
| 2 | Medline  | ("controlled clinical trial").ti,ab   |
| 3 | Medline  | ("randomi*ed").ab                     |
| 4 | Medline  | (placebo).ti,ab                       |
| 5 | Medline  | ("drug therapy").fs                   |



- 1
- 2
- 3 6 Medline (randomly).ti,ab
- 4
- 5 7 Medline (trial).ti,ab
- 6
- 7
- 8 8 Medline (groups).ti,ab
- 9
- 10
- 11 9 Medline (1 OR 2 OR 3 OR 4 OR 5 OR 6 OR 7 OR 8)
- 12
- 13 10 Medline (dorsalgia).ti,ab
- 14
- 15
- 16 11 Medline ("back pain").ti,ab
- 17
- 18 12 Medline (backache).ti,ab
- 19
- 20 13 Medline ("lumber pain").ti,ab
- 21
- 22
- 23 14 Medline (coccyx).ti,ab
- 24
- 25 15 Medline (coccydynia).ti,ab
- 26
- 27
- 28 16 Medline (sciatica\*).ti,ab
- 29
- 30
- 31 17 Medline (spondylosis).ti,ab
- 32
- 33
- 34 18 Medline (lumbago).ti,ab
- 35
- 36
- 37 19 Medline (10 OR 11 OR 12 OR 13 OR 14 OR 15 OR 16 OR 17
- 38 OR 18)
- 39
- 40 20 Medline (spine OR sacrum OR "lumber vertebrae" OR
- 41 "intervertebral disc\*").ti,ab
- 42
- 43 21 Medline (discitis).ti,ab
- 44
- 45
- 46 22 Medline ("disc degeneration").ti,ab
- 47
- 48
- 49 23 Medline ("disc prolapse").ti,ab
- 50
- 51 24 Medline ("disc herniation").ti,ab
- 52
- 53
- 54 25 Medline ("spinal fusion").ti,ab
- 55
- 56
- 57 26 Medline ("facet joints").ti,ab
- 58
- 59
- 60

|    |    |                                                          |
|----|----|----------------------------------------------------------|
| 1  |    |                                                          |
| 2  |    |                                                          |
| 3  | 27 | Medline (postlaminectomy).ti,ab                          |
| 4  |    |                                                          |
| 5  | 28 | Medline (arachnoiditis).ti,ab                            |
| 6  |    |                                                          |
| 7  |    |                                                          |
| 8  | 29 | Medline ("failed back").ti,ab                            |
| 9  |    |                                                          |
| 10 |    |                                                          |
| 11 | 30 | Medline (20 OR 21 OR 22 OR 23 OR 24 OR 25 OR 26 OR 27    |
| 12 |    | OR 28 OR 29)                                             |
| 13 |    |                                                          |
| 14 | 31 | Medline (19 OR 30)                                       |
| 15 |    |                                                          |
| 16 |    |                                                          |
| 17 | 32 | Medline (radiowave* OR "radio wave*").ti,ab              |
| 18 |    |                                                          |
| 19 |    |                                                          |
| 20 | 33 | Medline (radiofrequency OR "radio frequency").ti,ab      |
| 21 |    |                                                          |
| 22 | 34 | Medline (electrocoag*).ti,ab                             |
| 23 |    |                                                          |
| 24 |    |                                                          |
| 25 | 35 | Medline (thermocoag*).ti,ab                              |
| 26 |    |                                                          |
| 27 |    |                                                          |
| 28 | 36 | Medline (neurotom* OR neuroloy*).ti,ab                   |
| 29 |    |                                                          |
| 30 | 37 | Medline (32 OR 33 OR 34 OR 35 OR 36)                     |
| 31 |    |                                                          |
| 32 |    |                                                          |
| 33 | 38 | Medline (9 AND 31 AND 37)                                |
| 34 |    |                                                          |
| 35 | 39 | Medline 38 [Document status In Data Review OR In Process |
| 36 |    | OR PubMed not MEDLINE OR Publisher]                      |
| 37 |    |                                                          |
| 38 |    |                                                          |
| 39 |    |                                                          |

## Cinahl

| #  | Database | Search term                                   |
|----|----------|-----------------------------------------------|
| 41 |          |                                               |
| 42 |          |                                               |
| 43 |          |                                               |
| 44 |          |                                               |
| 45 | 1        | CINAHL exp "CLINICAL TRIALS"/                 |
| 46 |          |                                               |
| 47 |          |                                               |
| 48 | 2        | CINAHL ("randomi*ed controlled trial*").ti,ab |
| 49 |          |                                               |
| 50 |          |                                               |
| 51 | 3        | CINAHL (clinical ADJ3 trial).ti,ab            |
| 52 |          |                                               |
| 53 |          |                                               |
| 54 | 4        | CINAHL (double-blind).ti,ab                   |
| 55 |          |                                               |
| 56 | 5        | CINAHL (single-blind).ti,ab                   |
| 57 |          |                                               |
| 58 |          |                                               |
| 59 | 6        | CINAHL (triple-blind).ti,ab                   |
| 60 |          |                                               |

|    |    |        |                                    |
|----|----|--------|------------------------------------|
| 1  |    |        |                                    |
| 2  |    |        |                                    |
| 3  | 7  | CINAHL | (1 OR 2 OR 3 OR 4 OR 5 OR 6)       |
| 4  |    |        |                                    |
| 5  | 8  | CINAHL | "PLACEBO EFFECT"/                  |
| 6  |    |        |                                    |
| 7  |    |        |                                    |
| 8  | 9  | CINAHL | PLACEBOS/                          |
| 9  |    |        |                                    |
| 10 |    |        |                                    |
| 11 | 10 | CINAHL | (placebo*).ti,ab                   |
| 12 |    |        |                                    |
| 13 | 11 | CINAHL | (random*).ti,ab                    |
| 14 |    |        |                                    |
| 15 |    |        |                                    |
| 16 | 12 | CINAHL | (8 OR 9 OR 10 OR 11)               |
| 17 |    |        |                                    |
| 18 | 13 | CINAHL | "RANDOM SAMPLE"/                   |
| 19 |    |        |                                    |
| 20 |    |        |                                    |
| 21 | 14 | CINAHL | exp "STUDY DESIGN"/                |
| 22 |    |        |                                    |
| 23 |    |        |                                    |
| 24 | 15 | CINAHL | (latin square).ti,ab               |
| 25 |    |        |                                    |
| 26 | 16 | CINAHL | exp "COMPARATIVE STUDIES"/         |
| 27 |    |        |                                    |
| 28 |    |        |                                    |
| 29 | 17 | CINAHL | exp "EVALUATION RESEARCH"/         |
| 30 |    |        |                                    |
| 31 |    |        |                                    |
| 32 | 18 | CINAHL | exp "PROSPECTIVE STUDIES"/         |
| 33 |    |        |                                    |
| 34 | 19 | CINAHL | (13 OR 14 OR 15 OR 16 OR 17 OR 18) |
| 35 |    |        |                                    |
| 36 |    |        |                                    |
| 37 | 20 | CINAHL | (follow-up stud*).ti,ab            |
| 38 |    |        |                                    |
| 39 |    |        |                                    |
| 40 | 21 | CINAHL | (followup stud*).ti,ab             |
| 41 |    |        |                                    |
| 42 | 22 | CINAHL | (control*).ti,ab                   |
| 43 |    |        |                                    |
| 44 |    |        |                                    |
| 45 | 23 | CINAHL | (prospectiv*).ti,ab                |
| 46 |    |        |                                    |
| 47 | 24 | CINAHL | (volunteer*).ti,ab                 |
| 48 |    |        |                                    |
| 49 |    |        |                                    |
| 50 | 25 | CINAHL | (20 OR 21 OR 22 OR 23 OR 24)       |
| 51 |    |        |                                    |
| 52 | 26 | CINAHL | (7 OR 12 OR 19 OR 25)              |
| 53 |    |        |                                    |
| 54 |    |        |                                    |
| 55 | 27 | CINAHL | ANIMALS/                           |
| 56 |    |        |                                    |
| 57 |    |        |                                    |
| 58 | 28 | CINAHL | 26 not 27                          |
| 59 |    |        |                                    |
| 60 |    |        |                                    |

- 1  
2  
3 29 CINAHL ("dorsalgia").ti,ab  
4  
5  
6 30 CINAHL exp "BACK PAIN"/  
7  
8 31 CINAHL "LOW BACK PAIN"/  
9  
10  
11 32 CINAHL ("backache").ti,ab  
12  
13  
14 33 CINAHL (lumbar ADJ1 pain).ti,ab  
15  
16 34 CINAHL (lumbar ADJ5 pain).ti,ab  
17  
18  
19 35 CINAHL (29 OR 30 OR 31 OR 32 OR 33 OR 34)  
20  
21 36 CINAHL COCCYX/  
22  
23  
24 37 CINAHL SCIATICA/  
25  
26 38 CINAHL (sciatica).ti,ab  
27  
28  
29 39 CINAHL (coccyx).ti,ab  
30  
31  
32 40 CINAHL (coccydynia).ti,ab  
33  
34  
35 41 CINAHL "LUMBAR VERTEBRAE"/  
36  
37 42 CINAHL (lumbar ADJ2 vertebra).ti,ab  
38  
39  
40 43 CINAHL (36 OR 37 OR 38 OR 39 OR 40 OR 41 OR 42)  
41  
42 44 CINAHL "THORACIC VERTEBRAE"/  
43  
44  
45 45 CINAHL exp SPONDYLOLYSIS/  
46  
47 46 CINAHL (lumbago).ti,ab  
48  
49  
50 47 CINAHL (44 OR 45 OR 46)  
51  
52 48 CINAHL (35 OR 43 OR 47)  
53  
54  
55 49 CINAHL (28 AND 48)  
56  
57  
58 50 CINAHL (radiofrequency OR radio-frequency).ti,ab  
59  
60

|    |    |        |                                         |
|----|----|--------|-----------------------------------------|
| 1  |    |        |                                         |
| 2  |    |        |                                         |
| 3  | 51 | CINAHL | (thermocoag*).ti,ab                     |
| 4  |    |        |                                         |
| 5  | 52 | CINAHL | exp ELECTROCOAGULATION/ OR electrocoag* |
| 6  |    |        |                                         |
| 7  |    |        |                                         |
| 8  | 53 | CINAHL | (neurotom* OR neuroly*).ti,ab           |
| 9  |    |        |                                         |
| 10 |    |        |                                         |
| 11 | 54 | CINAHL | "RADIO WAVES"/                          |
| 12 |    |        |                                         |
| 13 | 55 | CINAHL | (50 OR 51 OR 52 OR 53 OR 54)            |
| 14 |    |        |                                         |
| 15 |    |        |                                         |
| 16 | 56 | CINAHL | (49 AND 55)                             |
| 17 |    |        |                                         |
| 18 |    |        |                                         |
| 19 | 57 | CINAHL | 56 [DT 2014-2019]                       |
| 20 |    |        |                                         |
| 21 |    |        |                                         |
| 22 |    |        |                                         |

### Cochrane

| #  | Database | Search term |                                                                                             |
|----|----------|-------------|---------------------------------------------------------------------------------------------|
| 23 |          |             |                                                                                             |
| 24 |          |             |                                                                                             |
| 25 |          |             |                                                                                             |
| 26 |          |             |                                                                                             |
| 27 |          |             |                                                                                             |
| 28 | 1        | Cochrane    | MeSH descriptor: [Back Pain] explode all trees                                              |
| 29 |          |             |                                                                                             |
| 30 |          |             |                                                                                             |
| 31 | 2        | Cochrane    | dorsalgia                                                                                   |
| 32 |          |             |                                                                                             |
| 33 | 3        | Cochrane    | backache                                                                                    |
| 34 |          |             |                                                                                             |
| 35 |          |             |                                                                                             |
| 36 | 4        | Cochrane    | MeSH descriptor: [Low Back Pain] explode all trees                                          |
| 37 |          |             |                                                                                             |
| 38 |          |             |                                                                                             |
| 39 | 5        | Cochrane    | lumbar next pain or coccyx or coccydynia or spondylosis                                     |
| 40 |          |             |                                                                                             |
| 41 | 6        | Cochrane    | MeSH descriptor: [Spine] explode all trees                                                  |
| 42 |          |             |                                                                                             |
| 43 |          |             |                                                                                             |
| 44 | 7        | Cochrane    | MeSH descriptor: [Spinal Diseases] explode all trees                                        |
| 45 |          |             |                                                                                             |
| 46 | 8        | Cochrane    | lumbago OR discitis OR disc near degeneration OR disc near prolapse OR disc near herniation |
| 47 |          |             |                                                                                             |
| 48 |          |             |                                                                                             |
| 49 | 9        | Cochrane    | spinal fusion                                                                               |
| 50 |          |             |                                                                                             |
| 51 |          |             |                                                                                             |
| 52 | 10       | Cochrane    | facet near joints                                                                           |
| 53 |          |             |                                                                                             |
| 54 |          |             |                                                                                             |
| 55 | 11       | Cochrane    | MeSH descriptor: [Intervertebral Disk] explode all trees                                    |
| 56 |          |             |                                                                                             |
| 57 |          |             |                                                                                             |
| 58 | 12       | Cochrane    | postlaminectomy                                                                             |
| 59 |          |             |                                                                                             |
| 60 |          |             |                                                                                             |

- 1  
2  
3 13 Cochrane arachnoiditis  
4  
5  
6 14 Cochrane failed near back  
7  
8 15 Cochrane MeSH descriptor: [Cauda Equina] explode all trees  
9  
10  
11 16 Cochrane lumbar near vertebra\*  
12  
13  
14 17 Cochrane spinal near stenosis  
15  
16 18 Cochrane slipped near (disc\* or disk\*)  
17  
18 19 Cochrane degenerat\* near (disc\* or disk\*)  
19  
20  
21 20 Cochrane stenosis near (spine or root or spinal)  
22  
23  
24 21 Cochrane displace\* near (disc\* or disk\*)  
25  
26 22 Cochrane prolap\* near (disc\* or disk\*)  
27  
28  
29 23 Cochrane MeSH descriptor: [Sciatic Neuropathy] explode all trees  
30  
31  
32 24 Cochrane sciatic\*  
33  
34 25 Cochrane back disorder\*  
35  
36  
37 26 Cochrane back near pain  
38  
39  
40 27 Cochrane #1 or #2 or #3 or #4 or #5 or #6 or #7 or #8 or #9 or #10  
41 or #11 or #12 or #13 or #14 or #15 or #16 or #17 or #18  
42 or #19 or #20 or #21 or #22 or #23 or #24 or #25 or #26  
43  
44 28 Cochrane MeSH descriptor: [Radio Waves] explode all trees  
45  
46  
47 29 Cochrane MeSH descriptor: [Pulsed Radiofrequency Treatment]  
48 explode all trees  
49  
50 30 Cochrane radiofrequency  
51  
52  
53 31 Cochrane radio frequency or radio-frequency  
54  
55 32 Cochrane MeSH descriptor: [Electrocoagulation] explode all trees  
56  
57  
58 33 Cochrane electrocoag\*  
59  
60

- 1
- 2
- 3 34 Cochrane thermocoag\*
- 4
- 5
- 6 35 Cochrane neurotom\* or neuroly\*
- 7
- 8 36 Cochrane #28 or #29 or #30 or #31 or #32 or #33 or #34 or #35
- 9
- 10
- 11 37 Cochrane #27 and #36 in Trials
- 12
- 13
- 14
- 15
- 16
- 17
- 18
- 19
- 20
- 21
- 22
- 23
- 24
- 25
- 26
- 27
- 28
- 29
- 30
- 31
- 32
- 33
- 34
- 35
- 36
- 37
- 38
- 39
- 40
- 41
- 42
- 43
- 44
- 45
- 46
- 47
- 48
- 49
- 50
- 51
- 52
- 53
- 54
- 55
- 56
- 57
- 58
- 59
- 60

For peer review only

## Appendix 2 Study characteristics

| Study                         | N   | Inclusion criteria                                                                                        |                                                                                             | Mean age (SD)                                    | Mean pain score (SD)                   | Intervention                                                            | Control                                                                   | Funding                                                                                                                                             |
|-------------------------------|-----|-----------------------------------------------------------------------------------------------------------|---------------------------------------------------------------------------------------------|--------------------------------------------------|----------------------------------------|-------------------------------------------------------------------------|---------------------------------------------------------------------------|-----------------------------------------------------------------------------------------------------------------------------------------------------|
| <b>RD of the facet joints</b> |     |                                                                                                           |                                                                                             |                                                  |                                        |                                                                         |                                                                           |                                                                                                                                                     |
| <b>Gallagher 1994</b>         | 41  | Low back pain >3 months duration with symptoms typical of facet joint pain                                | Improvement (n=30) or equivocal (n=11) response to anaesthetic block                        | NR                                               | VAS RD 5.8 (1.78); Sham 7.2 (1.94)     | Nerves above and below painful joint denervated at 80° for 90 seconds.  | Nerves also identified with stimulation but no heat lesion made           | NR                                                                                                                                                  |
| <b>Juch 2017</b>              | 251 | Low back pain without response to conservative management and considered to be related to the facet joint | Positive response to anaesthetic block (reported 50% pain relief 30-90 minutes after block) | RD 53.0 (11.5); Control 52.6 (10.8)              | NRS RD 7.14 (1.38) Control 7.19 (1.29) | Denervation at 90° for 90s of L3-4, L4-5 or L5-S1 with exercise program | Exercise program                                                          | The Netherlands Organization for Health Research and Development, by the Dutch Society for Anesthesiology, and the Dutch health insurance companies |
| <b>Leclaire 2001</b>          | 70  | Low back pain for >3 months                                                                               | “Significant” relief of back pain for >24h following facet injections                       | RD 46.7 (9.3); Sham 46.4 (9.8)                   | VAS RD 5.19 (2.67); Sham 5.15 (2.08)   | RD with fluoroscopic guidance at 80°C for 90s of at least 2 levels      | Nerves also identified with stimulation but electrode only heated to 37°C | Institut de recherche en sante´ and se´curite´ du travail du Que´bec                                                                                |
| <b>Moussa 2016</b>            | 80  | Low back pain for >1 year without response to conservative management                                     | Complete or near complete reduction of CLBP on VAS 30 min after 2                           | RD capsule 58.1 (NR); RD conventional 56.5 (NR); | VAS RD 8.22 (NR); Sham 7.83 (NR)       | RD of facet capsule on medial and lateral aspect or                     | Same procedure without elect current turned on                            | No funding received                                                                                                                                 |



|                         |    |                                                                                                           |                                                                                              |                                |                                  |                                                                                        |                                                                       |                                                   |
|-------------------------|----|-----------------------------------------------------------------------------------------------------------|----------------------------------------------------------------------------------------------|--------------------------------|----------------------------------|----------------------------------------------------------------------------------------|-----------------------------------------------------------------------|---------------------------------------------------|
|                         |    |                                                                                                           | injections separated by >2 weeks                                                             | Sham 55.9 (NR)                 |                                  | conventional RD at 85°C for 90s                                                        |                                                                       |                                                   |
| <b>Nath 2008</b>        | 40 | Low back pain for >2 years, not responded to previous treatment, pain attributable to lumbar facet joints | 80% pain relief on 3 medial branch blocks                                                    | 56 (range, 36–79)              | VAS RD 5.98 (NR); Sham 4.38 (NR) | RD at 85°C for 60s with additional lesions just lateral and medial to the target nerve | Same procedure as RD but electrode tip remained at body temperature   | No funding received                               |
| <b>Tekin 2007</b>       | 40 | Back pain for >6 months with focal pain over the facet joints and unresponsive to conservative treatments | >50% reduction in VAS pain 30 minutes after diagnostic medial branch block                   | RD 60.5 (8.5); Sham 57.9 (9.3) | VAS RD 6.5 (1.5); Sham 6.8 (1.6) | RD at same levels as diagnostic blocks at 80°C for 90s.                                | Same procedure as RD but with current switched off                    | Not reported                                      |
| <b>Van Kleef 1999</b>   | 32 | Low back pain of >12 months duration, failure of conservative management                                  | >50% reduction in pain following diagnostic nerve block of L3-L5<br>Baseline VAS score of >4 | RD 46.6 (7.4); Sham 41.4 (7.5) | VAS RD 5.2 (1.7); Sham 5.2 (1.6) | RD at 80°C for 60s                                                                     | Same procedure as RD but with current switched off                    | The Nederlandse organisatie voor wetenschappelijk |
| <b>Van Tilburg 2016</b> | 60 | Low back pain for >3 months and failure of conservative management                                        | Decrease of >2 on medial branch block                                                        | RD 65 (12); Sham 58 (12)       | NRS RD 7.2 (1.4); Sham 7.4 (0.8) | RD at 80°C for 60s per level for three steps with physiotherapy                        | Same procedure as RD but with current switched off with physiotherapy | No funding from a commercial party                |
| <b>Van Wijk 2005</b>    | 81 | Low back pain for >6 months                                                                               | ≥50% reduction on                                                                            | RD 46.9 (11.5);                | VAS RD 5.8 (1.8);                | RD 80°C for 60 seconds                                                                 | Same procedure as                                                     | Grant from the Dutch Health                       |

|                                    |     |                                                                                                                                          |                                                                                                                              |                                     |                                         |                                                                                                         |                                                                       |                                                                                                                                                             |
|------------------------------------|-----|------------------------------------------------------------------------------------------------------------------------------------------|------------------------------------------------------------------------------------------------------------------------------|-------------------------------------|-----------------------------------------|---------------------------------------------------------------------------------------------------------|-----------------------------------------------------------------------|-------------------------------------------------------------------------------------------------------------------------------------------------------------|
|                                    |     |                                                                                                                                          | diagnostic block                                                                                                             | Sham 48.1 (12.6)                    | Sham 6.5 (1.8)                          | at the levels concerned                                                                                 | RD but with current switched off                                      | Insurance Council                                                                                                                                           |
| <b>RD of the sacroiliac joints</b> |     |                                                                                                                                          |                                                                                                                              |                                     |                                         |                                                                                                         |                                                                       |                                                                                                                                                             |
| <b>Cohen 2008</b>                  | 28  | Axial low back or buttock pain $\geq$ 6 months, tenderness overlying the sacroiliac joint(s), failure to respond to conservative therapy | $\geq$ 75% pain relief for $\geq$ 3h following diagnostic sacroiliac joint injection, but back near baseline within 2 months | RD 51.9 (13.6); Sham 51.8 (13.1)    | VAS RD 6.1 (1.8); Sham 6.5 (1.9)        | RD 80°C for 90 seconds using cooling probe technology (Cooled RD)                                       | Same procedure as RD but no current applied                           | John P. Murtha Neuroscience and Pain Institute, the Army Regional Anesthesia & Pain Medicine Initiative, and National Institutes of Health grant # MH075884 |
| <b>Juch 2017</b>                   | 228 | Low back pain without response to conservative management, considered to be related to the sacroiliac joint.                             | Positive response to anaesthetic block (reported 50% pain relief 30-90 minutes after block)                                  | RD 51.6 (10.9); Control 51.1 (12.2) | NRS RD 7.17 (1.65); Control 7.06 (1.43) | RD - 60° for 2.5 min per lesion of S1, S2 and S3 with exercise program                                  | Exercise program                                                      | The Netherlands Organization for Health Research and Development, by the Dutch Society for Anesthesiology, and the Dutch health insurance companies         |
| <b>Mehta 2018</b>                  | 17  | CLBP for >6 months. >5 on NRS                                                                                                            | >80% pain reduction on 2 diagnostic blocks                                                                                   | RD 56.6 (NR); Sham 62.6 (NR)        | VAS RD 8.1 (0.8); Sham 7.3 (0.8)        | RD of the L5 medial branch of the primary dorsal root nerve and strip lesioning of the lateral branches | Identical to active RD treatment except that no RF energy was applied | None                                                                                                                                                        |

|                                       |    |                                                                                                          |                                                                                                                                                  |                                            |                                           |                                                                                                                       |                                                                   |                                                                     |
|---------------------------------------|----|----------------------------------------------------------------------------------------------------------|--------------------------------------------------------------------------------------------------------------------------------------------------|--------------------------------------------|-------------------------------------------|-----------------------------------------------------------------------------------------------------------------------|-------------------------------------------------------------------|---------------------------------------------------------------------|
|                                       |    |                                                                                                          |                                                                                                                                                  |                                            |                                           | of the S1, 2, and<br>3 nerve roots                                                                                    |                                                                   |                                                                     |
| <b>Patel 2012</b>                     | 51 | Pain for ≥6 months,<br>3-day average NRS<br>between 4 and 8,<br>failure of<br>conservative<br>management | ≥75% pain<br>reduction for<br>4h-7 days on<br>two sets of<br>anaesthetic<br>blocks and<br>back to<br>baseline by<br>start of the<br>study        | RD 56 (15);<br>Sham 64<br>(14)             | NRS RD 6.1<br>(1.3);<br>Sham 5.8<br>(1.3) | RD at 60°C for<br>150s of L5<br>dorsal ramus<br>and then acral<br>lateral branches<br>of S1, S2 and<br>S3 (cooled RD) | Same<br>procedure as<br>RD but RF<br>energy was<br>not delivered. | Baylis Medical                                                      |
| <b>Van Tilburg<br/>2016</b>           | 60 | Sacroiliac joint pain<br>for >3 months,<br>failure of<br>conservative<br>management                      | Decrease of<br>≥2 on NRS<br>following<br>diagnostic<br>block                                                                                     | RD 59.5<br>(27); Sham<br>62 (18)           | NRS RD 7.2<br>(1.4);<br>Sham 7.5<br>(1.2) | 85°C each<br>step for 90s,<br>total of 5 steps                                                                        | Same<br>procedure as<br>RD but no<br>heat lesions<br>made         | Not reported                                                        |
| <b>RD of the intervertebral discs</b> |    |                                                                                                          |                                                                                                                                                  |                                            |                                           |                                                                                                                       |                                                                   |                                                                     |
| <b>Barendse<br/>2001</b>              | 28 | Non-specific LBP for<br>>1y, failure of<br>conservative<br>management                                    | >50% pain<br>relief 30<br>minutes after<br>an analgesic<br>discography<br>at L4–L5 and<br>L5–S1.<br>Patients with<br>multilevel pain<br>excluded | RD 40.8<br>(7.5); Sham<br>45.2 (8.4)       | VAS RD 6.5<br>(1.3);<br>Sham 5.5<br>(1.1) | 70°C for 90s<br>without<br>anaesthetic                                                                                | Same<br>procedure as<br>RD but no<br>current<br>applied           | Not reported                                                        |
| <b>Desai 2016</b>                     | 63 | Lumbar discogenic<br>pain for ≥6 months,<br>unresponsive to<br>conservative<br>management                | Diagnosed via<br>provocation<br>discography -<br>definite<br>single-level<br>concordant                                                          | Mean age 41<br>(11);<br>Control 43<br>(11) | VAS RD 6.7<br>(NR);<br>Sham 7 (NR)        | RD at 50°C for<br>15 minutes and<br>then 60°C for<br>2.5 min (bopolar<br>cooled RD) with<br>conventional              | Conventional<br>medical<br>management                             | Halyard Health,<br>Inc. (formerly<br>Kimberly-Clark<br>Health Care) |

|                                              |    |                                                                                                                                                    |                                                                                                                                             |                                  |                                      |                                                                                                        |                                                                                                                                   |                                                                |
|----------------------------------------------|----|----------------------------------------------------------------------------------------------------------------------------------------------------|---------------------------------------------------------------------------------------------------------------------------------------------|----------------------------------|--------------------------------------|--------------------------------------------------------------------------------------------------------|-----------------------------------------------------------------------------------------------------------------------------------|----------------------------------------------------------------|
|                                              |    |                                                                                                                                                    | pain on manometry                                                                                                                           |                                  |                                      | medical management                                                                                     |                                                                                                                                   |                                                                |
| <b>Kapural 2013</b>                          | 55 | CLBP unresponsive to conservative management for ≥6 months; no surgical interventions within previous 3 months                                     | Single-level degenerative disc disease or two-level disease without evidence of additional degenerative changes in other disc spaces on MRI | RD 40.4 (10.3); Sham 38.4 (10.4) | VAS RD 7.13 (1.61); Sham 7.18 (1.98) | RD at 45°C bipolar for 15 minutes or 50°C bipolar for 15 minutes and monopolar at 60°C for 2.5 minutes | Mimicked active treatment, except that introducers and electrodes positioned just outside of the disc, and no RF energy delivered | Baylis Medical                                                 |
| <b>Kvarstein 2009</b>                        | 20 | Unremitting low back pain for more than 6 months; Pain intensity ≥5 /10 and low back pain greater than leg pain; Failure on conservative treatment | Positive one-level pain provocation discography                                                                                             | RD 44.7 (10.1); Sham 39.6 (8.9)  | NRS RD 4.6 (1.8); Sham 5.5 (2.0)     | RD increased by 5°C every second minute to 4-min interval at 65°C (from 50°C)                          | Exposed to a similar intervention, but the annulus was not exposed to RF heating                                                  | Radionics, TYCO Healthcare Group provided the discTRODE probes |
| <b>Van Tilburg 2017</b>                      | 60 | Low back pain >3 months and symptoms suggestive of lumbar disc problem                                                                             | Reduction of ≥2 on a numerical rating scale (0–10) after a diagnostic ramus communicans test block                                          | RD 50.5 (13.9); Sham 50.1 (12.3) | NRS 7.8 (1.05); Sham 7.8 (1.05)      | RD treatment at 80 °C for 60s per level                                                                | Same procedure but without RF treatment                                                                                           | No support received that influenced submitted work             |
| <b>RD of the vertebrae body and endplate</b> |    |                                                                                                                                                    |                                                                                                                                             |                                  |                                      |                                                                                                        |                                                                                                                                   |                                                                |

1  
2  
3  
4  
5  
6  
7  
8  
9  
10  
11  
12  
13  
14  
15  
16  
17  
18  
19  
20  
21  
22  
23  
24  
25  
26  
27  
28  
29  
30  
31  
32  
33  
34  
35  
36  
37  
38  
39  
40  
41  
42  
43  
44  
45  
46

|                        |     |                                                                                                                                   |                                   |                                                |                                      |                                                                             |                                                                                                    |              |
|------------------------|-----|-----------------------------------------------------------------------------------------------------------------------------------|-----------------------------------|------------------------------------------------|--------------------------------------|-----------------------------------------------------------------------------|----------------------------------------------------------------------------------------------------|--------------|
| <b>Fischgrund 2018</b> | 225 | CLBP ≥6 months, not responded to conservative treatment, Type 1 or Type 2 Modic changes required at the proposed treatment levels | No diagnostic block for inclusion | RD 46.9 (range 26–69); Sham 47.1 (range 25–69) | VAS RD 6.73 (1.38); Sham 6.64 (1.34) | Thermal ablation at the terminus of the basivertebral nerve 85°C for 15 min | Same procedure as RD but only docking introducer cannula 1–2 mm into the pedicle and simulating RD | Not reported |
|------------------------|-----|-----------------------------------------------------------------------------------------------------------------------------------|-----------------------------------|------------------------------------------------|--------------------------------------|-----------------------------------------------------------------------------|----------------------------------------------------------------------------------------------------|--------------|

CLBP, chronic low back pain; N, number of trials; NRS, numeric rating scale; RD, radiofrequency denervation; SD, standard deviation; VAS, visual analogue scale.

For peer review only
