# Supplementary material for: Radiofrequency denervation for chronic back pain: a systematic review and meta-analysis
Source: PubMed Central journal article supplement — BMJ Open. 2020 Jul 21;10(7):e035540. doi: 10.1136/bmjopen-2019-035540 (PMC7375436; doi:10.1136/bmjopen-2019-035540), 2020-07-21
Supplement: bmjopen-2019-035540supp001.pdf [file bmjopen-2019-035540supp001.pdf]

## Appendix 1 Search strategies

### Medline and Embase

| #  | Database | Search term                            |
|----|----------|----------------------------------------|
| 1  | Medline  | (randomized controlled trial).pt       |
| 2  | Medline  | (controlled clinical trial).pt         |
| 3  | Medline  | (randomi*ed).ab                        |
| 4  | Medline  | (placebo).ti,ab                        |
| 5  | Medline  | (drug therapy).fs                      |
| 6  | Medline  | (randomly).ti,ab                       |
| 7  | Medline  | (trial).ti,ab                          |
| 8  | Medline  | (groups).ti,ab                         |
| 9  | Medline  | (1 OR 2 OR 3 OR 4 OR 5 OR 6 OR 7 OR 8) |
| 10 | Medline  | (animals NOT (humans AND animals)).su  |
| 11 | Medline  | 9 not 10                               |
| 12 | Medline  | (dorsalgia).ti,ab                      |
| 13 | Medline  | exp "BACK PAIN"/                       |
| 14 | Medline  | (backache).ti,ab                       |
| 15 | Medline  | (lumbar ADJ pain).ti,ab                |
| 16 | Medline  | (coccyx).ti,ab                         |
| 17 | Medline  | (coccydynia).ti,ab                     |
| 18 | Medline  | (sciatica).ti,ab                       |
| 19 | Medline  | "SCIATIC NEUROPATHY"/                  |

- 20 Medline (spondylosis).ti,ab
- 21 Medline (lumbago).ti,ab
- 22 Medline (12 OR 13 OR 14 OR 15 OR 16 OR 17 OR 18 OR 19 OR 20 OR 21)
- 23 Medline exp SPINE/
- 24 Medline (discitis).ti,ab
- 25 Medline exp "SPINAL DISEASES"/
- 26 Medline (disc ADJ degeneration).ti,ab
- 27 Medline (disc ADJ prolapse).ti,ab
- 28 Medline (disc ADJ herniation).ti,ab
- 29 Medline (spinal fusion).su
- 30 Medline (facet ADJ joints).ti,ab
- 31 Medline (intervertebral disc).su
- 32 Medline (postlaminectomy).ti,ab
- 33 Medline (arachnoiditis).ti,ab
- 34 Medline (failed ADJ back).ti,ab
- 35 Medline (23 OR 24 OR 25 OR 26 OR 27 OR 28 OR 29 OR 30 OR 31 OR 32 OR 33 OR 34)
- 36 Medline (22 OR 35)
- 37 Medline exp "RADIO WAVES"/
- 38 Medline exp "PULSED RADIOFREQUENCY TREATMENT"/
- 39 Medline (radiofrequency).af
- 40 Medline (radio frequency).af

41 Medline exp ELECTROCOAGULATION/  
42 Medline (electrocoag\*).af  
43 Medline (thermocoag\*).af  
44 Medline neurotom\* OR (neuroly\*).af  
45 Medline (37 OR 38 OR 39 OR 40 OR 41 OR 42 OR 43 OR 44)  
46 Medline (11 AND 36 AND 45)  
47 EMBASE "CLINICAL TRIAL"/  
48 EMBASE "CONTROLLED CLINICAL TRIAL"/  
49 EMBASE "CONTROLLED STUDY"/  
50 EMBASE "RANDOMIZED CONTROLLED TRIAL"/  
51 EMBASE "DOUBLE BLIND PROCEDURE"/  
52 EMBASE "SINGLE BLIND PROCEDURE"/  
53 EMBASE "CROSSOVER PROCEDURE"/  
54 EMBASE PLACEBO/  
55 EMBASE (allocat\*).ti,ab  
56 EMBASE (assign\*).ti,ab  
57 EMBASE (blind\*).ti,ab  
58 EMBASE (clinic\* ADJ25 (study OR trial)).ti,ab  
59 EMBASE (crossover OR cross-over).ti,ab  
60 EMBASE (factorial\*).ti,ab  
61 EMBASE (followup OR follow-up).ti,ab  
62 EMBASE (prospectiv\*).ti,ab

- 63 EMBASE (placebo\*).ti,ab
- 64 EMBASE (random\*).ti,ab
- 65 EMBASE ((singl\* OR doubl\* OR trebl\* OR trip\*) ADJ25 (blind\* OR mask\*)).ti,ab
- 66 EMBASE (volunteer\*).ti,ab
- 67 EMBASE (47 OR 48 OR 49 OR 50 OR 51 OR 52 OR 53 OR 54 OR 55 OR 56 OR 57 OR 58 OR 59 OR 60 OR 61 OR 62 OR 63 OR 64 OR 65 OR 66)
- 68 EMBASE exp animals/ or exp invertebrate/ or animal experiment/ or animal model/ or animal tissue/ or animal cell/ or nonhuman/
- 69 EMBASE exp ANIMALS/
- 70 EMBASE exp INVERTEBRATE/
- 71 EMBASE ANIMAL EXPERIMENT/
- 72 EMBASE ANIMAL MODEL/
- 73 EMBASE ANIMAL TISSUE/
- 74 EMBASE ANIMAL CELL/
- 75 EMBASE NONHUMAN/
- 76 EMBASE 71 or 72 or 73 or 74 or 75
- 77 EMBASE exp ANIMALS/
- 78 EMBASE exp INVERTEBRATE/
- 79 EMBASE (76 OR 77 OR 78)
- 80 EMBASE 77 or 78
- 81 EMBASE HUMAN/ OR NORMAL HUMAN/ OR HUMAN CELL/
- 82 EMBASE (76 AND 77 AND 78 AND 81)

- 83 EMBASE (dorsalgia).ti,ab
- 84 EMBASE (back pain).ti,ab
- 85 EMBASE exp BACKACHE/
- 86 EMBASE (lumbar ADJ pain).ti,ab
- 87 EMBASE (coccyx).ti,ab
- 88 EMBASE (coccydynia).ti,ab
- 89 EMBASE (sciatica).ti,ab
- 90 EMBASE ISCHIALGIA/
- 91 EMBASE (spondylosis).ti,ab
- 92 EMBASE (lumbago).ti,ab
- 93 EMBASE (back disorder\*).ti,ab
- 94 EMBASE (83 OR 84 OR 85 OR 86 OR 87 OR 88 OR 89 OR 90 OR 91 OR 92 OR 93)
- 95 EMBASE exp SPINE/
- 96 EMBASE (discitis OR diskitis).ti,ab
- 97 EMBASE exp "SPINE DISEASE"/
- 98 EMBASE (disc ADJ degeneration).ti,ab
- 99 EMBASE (disc ADJ prolapse).ti,ab
- 100 EMBASE (disc ADJ herniation).ti,ab
- 101 EMBASE (spinal fusion).ti,ab
- 102 EMBASE (facet ADJ joints).ti,ab
- 103 EMBASE (intervertebral disk OR Intervertebral disc).ti,ab
- 104 EMBASE (postlaminectomy).ti,ab

|     |         |                                                                               |
|-----|---------|-------------------------------------------------------------------------------|
| 105 | EMBASE  | (arachnoiditis).ti,ab                                                         |
| 106 | EMBASE  | (failed ADJ back).ti,ab                                                       |
| 107 | EMBASE  | (95 OR 96 OR 97 OR 98 OR 99 OR 100 OR 101 OR 102 OR 103 OR 104 OR 105 OR 106) |
| 108 | EMBASE  | 94 or 107                                                                     |
| 109 | EMBASE  | exp PULSED RADIOFREQUENCY TREATMENT/                                          |
| 110 | EMBASE  | exp RADIOFREQUENCY/                                                           |
| 111 | EMBASE  | exp RADIOFREQUENCY RADIATION/                                                 |
| 112 | EMBASE  | (radiofrequency OR radio-frequency).ti,ab                                     |
| 113 | EMBASE  | exp THERMOCOAGULATION/ OR thermocoag*                                         |
| 114 | EMBASE  | exp ELECTROCOAGULATION/ OR electrocoag*                                       |
| 115 | EMBASE  | (neurotom* OR neuroly*).ti,ab                                                 |
| 116 | EMBASE  | (109 OR 110 OR 111 OR 112 OR 113 OR 114 OR 115)                               |
| 117 | EMBASE  | (108 AND 116)                                                                 |
| 118 | Medline | 46 [DT 2014-2019]                                                             |

### Medline in process

| # | Database | Search term                           |
|---|----------|---------------------------------------|
| 1 | Medline  | ("randomi*ed controlled trial").ti,ab |
| 2 | Medline  | ("controlled clinical trial").ti,ab   |
| 3 | Medline  | ("randomi*ed").ab                     |
| 4 | Medline  | (placebo).ti,ab                       |
| 5 | Medline  | ("drug therapy").fs                   |

|    |         |                                                                         |
|----|---------|-------------------------------------------------------------------------|
| 6  | Medline | (randomly).ti,ab                                                        |
| 7  | Medline | (trial).ti,ab                                                           |
| 8  | Medline | (groups).ti,ab                                                          |
| 9  | Medline | (1 OR 2 OR 3 OR 4 OR 5 OR 6 OR 7 OR 8)                                  |
| 10 | Medline | (dorsalgia).ti,ab                                                       |
| 11 | Medline | ("back pain").ti,ab                                                     |
| 12 | Medline | (backache).ti,ab                                                        |
| 13 | Medline | ("lumber pain").ti,ab                                                   |
| 14 | Medline | (coccyx).ti,ab                                                          |
| 15 | Medline | (coccydynia).ti,ab                                                      |
| 16 | Medline | (sciatica*).ti,ab                                                       |
| 17 | Medline | (spondylosis).ti,ab                                                     |
| 18 | Medline | (lumbago).ti,ab                                                         |
| 19 | Medline | (10 OR 11 OR 12 OR 13 OR 14 OR 15 OR 16 OR 17 OR 18)                    |
| 20 | Medline | (spine OR sacrum OR "lumber vertebrae" OR "intervertebral disc*").ti,ab |
| 21 | Medline | (discitis).ti,ab                                                        |
| 22 | Medline | ("disc degeneration").ti,ab                                             |
| 23 | Medline | ("disc prolapse").ti,ab                                                 |
| 24 | Medline | ("disc herniation").ti,ab                                               |
| 25 | Medline | ("spinal fusion").ti,ab                                                 |
| 26 | Medline | ("facet joints").ti,ab                                                  |

|    |         |                                                                                      |
|----|---------|--------------------------------------------------------------------------------------|
| 27 | Medline | (postlaminectomy).ti,ab                                                              |
| 28 | Medline | (arachnoiditis).ti,ab                                                                |
| 29 | Medline | ("failed back").ti,ab                                                                |
| 30 | Medline | (20 OR 21 OR 22 OR 23 OR 24 OR 25 OR 26 OR 27 OR 28 OR 29)                           |
| 31 | Medline | (19 OR 30)                                                                           |
| 32 | Medline | (radiowave* OR "radio wave*").ti,ab                                                  |
| 33 | Medline | (radiofrequency OR "radio frequency").ti,ab                                          |
| 34 | Medline | (electrocoag*).ti,ab                                                                 |
| 35 | Medline | (thermocoag*).ti,ab                                                                  |
| 36 | Medline | (neurotom* OR neuroloy*).ti,ab                                                       |
| 37 | Medline | (32 OR 33 OR 34 OR 35 OR 36)                                                         |
| 38 | Medline | (9 AND 31 AND 37)                                                                    |
| 39 | Medline | 38 [Document status In Data Review OR In Process OR PubMed not MEDLINE OR Publisher] |

### Cinahl

| # | Database | Search term                            |
|---|----------|----------------------------------------|
| 1 | CINAHL   | exp "CLINICAL TRIALS"/                 |
| 2 | CINAHL   | ("randomi*ed controlled trial*").ti,ab |
| 3 | CINAHL   | (clinical ADJ3 trial).ti,ab            |
| 4 | CINAHL   | (double-blind).ti,ab                   |
| 5 | CINAHL   | (single-blind).ti,ab                   |
| 6 | CINAHL   | (triple-blind).ti,ab                   |

7 CINAHL (1 OR 2 OR 3 OR 4 OR 5 OR 6)

8 CINAHL "PLACEBO EFFECT"/

9 CINAHL PLACEBOS/

10 CINAHL (placebo\*).ti,ab

11 CINAHL (random\*).ti,ab

12 CINAHL (8 OR 9 OR 10 OR 11)

13 CINAHL "RANDOM SAMPLE"/

14 CINAHL exp "STUDY DESIGN"/

15 CINAHL (latin square).ti,ab

16 CINAHL exp "COMPARATIVE STUDIES"/

17 CINAHL exp "EVALUATION RESEARCH"/

18 CINAHL exp "PROSPECTIVE STUDIES"/

19 CINAHL (13 OR 14 OR 15 OR 16 OR 17 OR 18)

20 CINAHL (follow-up stud\*).ti,ab

21 CINAHL (followup stud\*).ti,ab

22 CINAHL (control\*).ti,ab

23 CINAHL (prospectiv\*).ti,ab

24 CINAHL (volunteer\*).ti,ab

25 CINAHL (20 OR 21 OR 22 OR 23 OR 24)

26 CINAHL (7 OR 12 OR 19 OR 25)

27 CINAHL ANIMALS/

28 CINAHL 26 not 27

- 29 CINAHL ("dorsalgia").ti,ab
- 30 CINAHL exp "BACK PAIN"/
- 31 CINAHL "LOW BACK PAIN"/
- 32 CINAHL ("backache").ti,ab
- 33 CINAHL (lumbar ADJ1 pain).ti,ab
- 34 CINAHL (lumbar ADJ5 pain).ti,ab
- 35 CINAHL (29 OR 30 OR 31 OR 32 OR 33 OR 34)
- 36 CINAHL COCCYX/
- 37 CINAHL SCIATICA/
- 38 CINAHL (sciatica).ti,ab
- 39 CINAHL (coccyx).ti,ab
- 40 CINAHL (coccydynia).ti,ab
- 41 CINAHL "LUMBAR VERTEBRAE"/
- 42 CINAHL (lumbar ADJ2 vertebra).ti,ab
- 43 CINAHL (36 OR 37 OR 38 OR 39 OR 40 OR 41 OR 42)
- 44 CINAHL "THORACIC VERTEBRAE"/
- 45 CINAHL exp SPONDYLOLYSIS/
- 46 CINAHL (lumbago).ti,ab
- 47 CINAHL (44 OR 45 OR 46)
- 48 CINAHL (35 OR 43 OR 47)
- 49 CINAHL (28 AND 48)
- 50 CINAHL (radiofrequency OR radio-frequency).ti,ab

|    |        |                                         |
|----|--------|-----------------------------------------|
| 51 | CINAHL | (thermocoag*).ti,ab                     |
| 52 | CINAHL | exp ELECTROCOAGULATION/ OR electrocoag* |
| 53 | CINAHL | (neurotom* OR neuroly*).ti,ab           |
| 54 | CINAHL | "RADIO WAVES"/                          |
| 55 | CINAHL | (50 OR 51 OR 52 OR 53 OR 54)            |
| 56 | CINAHL | (49 AND 55)                             |
| 57 | CINAHL | 56 [DT 2014-2019]                       |

### Cochrane

| #  | Database | Search term                                                                                 |
|----|----------|---------------------------------------------------------------------------------------------|
| 1  | Cochrane | MeSH descriptor: [Back Pain] explode all trees                                              |
| 2  | Cochrane | dorsalgia                                                                                   |
| 3  | Cochrane | backache                                                                                    |
| 4  | Cochrane | MeSH descriptor: [Low Back Pain] explode all trees                                          |
| 5  | Cochrane | lumbar next pain or coccyx or coccydynia or spondylosis                                     |
| 6  | Cochrane | MeSH descriptor: [Spine] explode all trees                                                  |
| 7  | Cochrane | MeSH descriptor: [Spinal Diseases] explode all trees                                        |
| 8  | Cochrane | lumbago OR discitis OR disc near degeneration OR disc near prolapse OR disc near herniation |
| 9  | Cochrane | spinal fusion                                                                               |
| 10 | Cochrane | facet near joints                                                                           |
| 11 | Cochrane | MeSH descriptor: [Intervertebral Disk] explode all trees                                    |
| 12 | Cochrane | postlaminectomy                                                                             |

|    |          |                                                                                                                                                                                 |
|----|----------|---------------------------------------------------------------------------------------------------------------------------------------------------------------------------------|
| 13 | Cochrane | arachnoiditis                                                                                                                                                                   |
| 14 | Cochrane | failed near back                                                                                                                                                                |
| 15 | Cochrane | MeSH descriptor: [Cauda Equina] explode all trees                                                                                                                               |
| 16 | Cochrane | lumbar near vertebra*                                                                                                                                                           |
| 17 | Cochrane | spinal near stenosis                                                                                                                                                            |
| 18 | Cochrane | slipped near (disc* or disk*)                                                                                                                                                   |
| 19 | Cochrane | degenerat* near (disc* or disk*)                                                                                                                                                |
| 20 | Cochrane | stenosis near (spine or root or spinal)                                                                                                                                         |
| 21 | Cochrane | displace* near (disc* or disk*)                                                                                                                                                 |
| 22 | Cochrane | prolap* near (disc* or disk*)                                                                                                                                                   |
| 23 | Cochrane | MeSH descriptor: [Sciatic Neuropathy] explode all trees                                                                                                                         |
| 24 | Cochrane | sciatic*                                                                                                                                                                        |
| 25 | Cochrane | back disorder*                                                                                                                                                                  |
| 26 | Cochrane | back near pain                                                                                                                                                                  |
| 27 | Cochrane | #1 or #2 or #3 or #4 or #5 or #6 or #7 or #8 or #9 or #10<br>or #11 or #12 or #13 or #14 or #15 or #16 or #17 or #18<br>or #19 or #20 or #21 or #22 or #23 or #24 or #25 or #26 |
| 28 | Cochrane | MeSH descriptor: [Radio Waves] explode all trees                                                                                                                                |
| 29 | Cochrane | MeSH descriptor: [Pulsed Radiofrequency Treatment]<br>explode all trees                                                                                                         |
| 30 | Cochrane | radiofrequency                                                                                                                                                                  |
| 31 | Cochrane | radio frequency or radio-frequency                                                                                                                                              |
| 32 | Cochrane | MeSH descriptor: [Electrocoagulation] explode all trees                                                                                                                         |
| 33 | Cochrane | electrocoag*                                                                                                                                                                    |

- 34 Cochrane thermocoag\*
- 35 Cochrane neurotom\* or neuroly\*
- 36 Cochrane #28 or #29 or #30 or #31 or #32 or #33 or #34 or #35
- 37 Cochrane #27 and #36 in Trials
