# Supplementary material for: Radiofrequency denervation for chronic back pain: a systematic review and meta-analysis
Source: PubMed Central journal article supplement — BMJ Open. 2020 Jul 21;10(7):e035540. doi: 10.1136/bmjopen-2019-035540 (PMC7375436; doi:10.1136/bmjopen-2019-035540), 2020-07-21
Supplement: bmjopen-2019-035540supp002.pdf [file bmjopen-2019-035540supp002.pdf]

## Appendix 2 Study characteristics

| Study                         | N   | Inclusion criteria                                                                                        |                                                                                             | Mean age (SD)                                    | Mean pain score (SD)                   | Intervention                                                            | Control                                                                   | Funding                                                                                                                                             |
|-------------------------------|-----|-----------------------------------------------------------------------------------------------------------|---------------------------------------------------------------------------------------------|--------------------------------------------------|----------------------------------------|-------------------------------------------------------------------------|---------------------------------------------------------------------------|-----------------------------------------------------------------------------------------------------------------------------------------------------|
| <b>RD of the facet joints</b> |     |                                                                                                           |                                                                                             |                                                  |                                        |                                                                         |                                                                           |                                                                                                                                                     |
| <b>Gallagher 1994</b>         | 41  | Low back pain >3 months duration with symptoms typical of facet joint pain                                | Improvement (n=30) or equivocal (n=11) response to anaesthetic block                        | NR                                               | VAS RD 5.8 (1.78); Sham 7.2 (1.94)     | Nerves above and below painful joint denervated at 80° for 90 seconds.  | Nerves also identified with stimulation but no heat lesion made           | NR                                                                                                                                                  |
| <b>Juch 2017</b>              | 251 | Low back pain without response to conservative management and considered to be related to the facet joint | Positive response to anaesthetic block (reported 50% pain relief 30-90 minutes after block) | RD 53.0 (11.5); Control 52.6 (10.8)              | NRS RD 7.14 (1.38) Control 7.19 (1.29) | Denervation at 90° for 90s of L3-4, L4-5 or L5-S1 with exercise program | Exercise program                                                          | The Netherlands Organization for Health Research and Development, by the Dutch Society for Anesthesiology, and the Dutch health insurance companies |
| <b>Leclaire 2001</b>          | 70  | Low back pain for >3 months                                                                               | “Significant” relief of back pain for >24h following facet injections                       | RD 46.7 (9.3); Sham 46.4 (9.8)                   | VAS RD 5.19 (2.67); Sham 5.15 (2.08)   | RD with fluoroscopic guidance at 80°C for 90s of at least 2 levels      | Nerves also identified with stimulation but electrode only heated to 37°C | Institut de recherche en sante´ and se´curite´ du travail du Que´bec                                                                                |
| <b>Moussa 2016</b>            | 80  | Low back pain for >1 year without response to conservative management                                     | Complete or near complete reduction of CLBP on VAS 30 min after 2                           | RD capsule 58.1 (NR); RD conventional 56.5 (NR); | VAS RD 8.22 (NR); Sham 7.83 (NR)       | RD of facet capsule on medial and lateral aspect or                     | Same procedure without elect current turned on                            | No funding received                                                                                                                                 |

|                         |    |                                                                                                           | injections separated by >2 weeks                                                             | Sham 55.9 (NR)                 |                                  | conventional RD at 85°C for 90s                                                        |                                                                       |                                                   |
|-------------------------|----|-----------------------------------------------------------------------------------------------------------|----------------------------------------------------------------------------------------------|--------------------------------|----------------------------------|----------------------------------------------------------------------------------------|-----------------------------------------------------------------------|---------------------------------------------------|
| <b>Nath 2008</b>        | 40 | Low back pain for >2 years, not responded to previous treatment, pain attributable to lumbar facet joints | 80% pain relief on 3 medial branch blocks                                                    | 56 (range, 36–79)              | VAS RD 5.98 (NR); Sham 4.38 (NR) | RD at 85°C for 60s with additional lesions just lateral and medial to the target nerve | Same procedure as RD but electrode tip remained at body temperature   | No funding received                               |
| <b>Tekin 2007</b>       | 40 | Back pain for >6 months with focal pain over the facet joints and unresponsive to conservative treatments | >50% reduction in VAS pain 30 minutes after diagnostic medial branch block                   | RD 60.5 (8.5); Sham 57.9 (9.3) | VAS RD 6.5 (1.5); Sham 6.8 (1.6) | RD at same levels as diagnostic blocks at 80°C for 90s.                                | Same procedure as RD but with current switched off                    | Not reported                                      |
| <b>Van Kleef 1999</b>   | 32 | Low back pain of >12 months duration, failure of conservative management                                  | >50% reduction in pain following diagnostic nerve block of L3-L5<br>Baseline VAS score of >4 | RD 46.6 (7.4); Sham 41.4 (7.5) | VAS RD 5.2 (1.7); Sham 5.2 (1.6) | RD at 80°C for 60s                                                                     | Same procedure as RD but with current switched off                    | The Nederlandse organisatie voor wetenschappelijk |
| <b>Van Tilburg 2016</b> | 60 | Low back pain for >3 months and failure of conservative management                                        | Decrease of >2 on medial branch block                                                        | RD 65 (12); Sham 58 (12)       | NRS RD 7.2 (1.4); Sham 7.4 (0.8) | RD at 80°C for 60s per level for three steps with physiotherapy                        | Same procedure as RD but with current switched off with physiotherapy | No funding from a commercial party                |
| <b>Van Wijk 2005</b>    | 81 | Low back pain for >6 months                                                                               | ≥50% reduction on                                                                            | RD 46.9 (11.5);                | VAS RD 5.8 (1.8);                | RD 80°C for 60 seconds                                                                 | Same procedure as                                                     | Grant from the Dutch Health                       |

|                                    |     |                                                                                                                                     | diagnostic block                                                                                                  | Sham 48.1 (12.6)                    | Sham 6.5 (1.8)                          | at the levels concerned                                                                                 | RD but with current switched off                                      | Insurance Council                                                                                                                                           |
|------------------------------------|-----|-------------------------------------------------------------------------------------------------------------------------------------|-------------------------------------------------------------------------------------------------------------------|-------------------------------------|-----------------------------------------|---------------------------------------------------------------------------------------------------------|-----------------------------------------------------------------------|-------------------------------------------------------------------------------------------------------------------------------------------------------------|
| <b>RD of the sacroiliac joints</b> |     |                                                                                                                                     |                                                                                                                   |                                     |                                         |                                                                                                         |                                                                       |                                                                                                                                                             |
| <b>Cohen 2008</b>                  | 28  | Axial low back or buttock pain ≥ 6 months, tenderness overlying the sacroiliac joint(s), failure to respond to conservative therapy | ≥ 75% pain relief for ≥3h following diagnostic sacroiliac joint injection, but back near baseline within 2 months | RD 51.9 (13.6); Sham 51.8 (13.1)    | VAS RD 6.1 (1.8); Sham 6.5 (1.9)        | RD 80°C for 90 seconds using cooling probe technology (Cooled RD)                                       | Same procedure as RD but no current applied                           | John P. Murtha Neuroscience and Pain Institute, the Army Regional Anesthesia & Pain Medicine Initiative, and National Institutes of Health grant # MH075884 |
| <b>Juch 2017</b>                   | 228 | Low back pain without response to conservative management, considered to be related to the sacroiliac joint.                        | Positive response to anaesthetic block (reported 50% pain relief 30-90 minutes after block)                       | RD 51.6 (10.9); Control 51.1 (12.2) | NRS RD 7.17 (1.65); Control 7.06 (1.43) | RD - 60° for 2.5 min per lesion of S1, S2 and S3 with exercise program                                  | Exercise program                                                      | The Netherlands Organization for Health Research and Development, by the Dutch Society for Anesthesiology, and the Dutch health insurance companies         |
| <b>Mehta 2018</b>                  | 17  | CLBP for >6 months. >5 on NRS                                                                                                       | >80% pain reduction on 2 diagnostic blocks                                                                        | RD 56.6 (NR); Sham 62.6 (NR)        | VAS RD 8.1 (0.8); Sham 7.3 (0.8)        | RD of the L5 medial branch of the primary dorsal root nerve and strip lesioning of the lateral branches | Identical to active RD treatment except that no RF energy was applied | None                                                                                                                                                        |

|                                       |    |                                                                                           |                                                                                                                       |                                   |                                  |                                                                                                                                        |                                                       |                                                            |
|---------------------------------------|----|-------------------------------------------------------------------------------------------|-----------------------------------------------------------------------------------------------------------------------|-----------------------------------|----------------------------------|----------------------------------------------------------------------------------------------------------------------------------------|-------------------------------------------------------|------------------------------------------------------------|
| <b>Patel 2012</b>                     | 51 | Pain for ≥6 months, 3-day average NRS between 4 and 8, failure of conservative management | ≥75% pain reduction for 4h-7 days on two sets of anaesthetic blocks and back to baseline by start of the study        | RD 56 (15); Sham 64 (14)          | NRS RD 6.1 (1.3); Sham 5.8 (1.3) | of the S1, 2, and 3 nerve roots<br>RD at 60°C for 150s of L5 dorsal ramus and then acral lateral branches of S1, S2 and S3 (cooled RD) | Same procedure as RD but RF energy was not delivered. | Baylis Medical                                             |
| <b>Van Tilburg 2016</b>               | 60 | Sacroiliac joint pain for >3 months, failure of conservative management                   | Decrease of ≥2 on NRS following diagnostic block                                                                      | RD 59.5 (27); Sham 62 (18)        | NRS RD 7.2 (1.4); Sham 7.5 (1.2) | 85°C each step for 90s, total of 5 steps                                                                                               | Same procedure as RD but no heat lesions made         | Not reported                                               |
| <b>RD of the intervertebral discs</b> |    |                                                                                           |                                                                                                                       |                                   |                                  |                                                                                                                                        |                                                       |                                                            |
| <b>Barendse 2001</b>                  | 28 | Non-specific LBP for >1y, failure of conservative management                              | >50% pain relief 30 minutes after an analgesic discography at L4–L5 and L5–S1. Patients with multilevel pain excluded | RD 40.8 (7.5); Sham 45.2 (8.4)    | VAS RD 6.5 (1.3); Sham 5.5 (1.1) | 70°C for 90s without anaesthetic                                                                                                       | Same procedure as RD but no current applied           | Not reported                                               |
| <b>Desai 2016</b>                     | 63 | Lumbar discogenic pain for ≥6 months, unresponsive to conservative management             | Diagnosed via provocation discography - definite single-level concordant                                              | Mean age 41 (11); Control 43 (11) | VAS RD 6.7 (NR); Sham 7 (NR)     | RD at 50°C for 15 minutes and then 60°C for 2.5 min (bopolar cooled RD) with conventional                                              | Conventional medical management                       | Halyard Health, Inc. (formerly Kimberly-Clark Health Care) |

|                                              |    |                                                                                                                                                    |                                                                                                                                             |                                  |                                      |                                                                                                        |                                                                                                                                   |                                                                |
|----------------------------------------------|----|----------------------------------------------------------------------------------------------------------------------------------------------------|---------------------------------------------------------------------------------------------------------------------------------------------|----------------------------------|--------------------------------------|--------------------------------------------------------------------------------------------------------|-----------------------------------------------------------------------------------------------------------------------------------|----------------------------------------------------------------|
|                                              |    |                                                                                                                                                    | pain on manometry                                                                                                                           |                                  |                                      | medical management                                                                                     |                                                                                                                                   |                                                                |
| <b>Kapuraj 2013</b>                          | 55 | CLBP unresponsive to conservative management for ≥6 months; no surgical interventions within previous 3 months                                     | Single-level degenerative disc disease or two-level disease without evidence of additional degenerative changes in other disc spaces on MRI | RD 40.4 (10.3); Sham 38.4 (10.4) | VAS RD 7.13 (1.61); Sham 7.18 (1.98) | RD at 45°C bipolar for 15 minutes or 50°C bipolar for 15 minutes and monopolar at 60°C for 2.5 minutes | Mimicked active treatment, except that introducers and electrodes positioned just outside of the disc, and no RF energy delivered | Baylis Medical                                                 |
| <b>Kvarstein 2009</b>                        | 20 | Unremitting low back pain for more than 6 months; Pain intensity ≥5 /10 and low back pain greater than leg pain; Failure on conservative treatment | Positive one-level pain provocation discography                                                                                             | RD 44.7 (10.1); Sham 39.6 (8.9)  | NRS RD 4.6 (1.8); Sham 5.5 (2.0)     | RD increased by 5°C every second minute to 4-min interval at 65°C (from 50°C)                          | Exposed to a similar intervention, but the annulus was not exposed to RF heating                                                  | Radionics, TYCO Healthcare Group provided the discTRODE probes |
| <b>Van Tilburg 2017</b>                      | 60 | Low back pain >3 months and symptoms suggestive of lumbar disc problem                                                                             | Reduction of ≥2 on a numerical rating scale (0–10) after a diagnostic ramus communicans test block                                          | RD 50.5 (13.9); Sham 50.1 (12.3) | NRS 7.8 (1.05); Sham 7.8 (1.05)      | RD treatment at 80 °C for 60s per level                                                                | Same procedure but without RF treatment                                                                                           | No support received that influenced submitted work             |
| <b>RD of the vertebrae body and endplate</b> |    |                                                                                                                                                    |                                                                                                                                             |                                  |                                      |                                                                                                        |                                                                                                                                   |                                                                |

|                        |     |                                                                                                                                   |                                   |                                                |                                      |                                                                             |                                                                                                    |              |
|------------------------|-----|-----------------------------------------------------------------------------------------------------------------------------------|-----------------------------------|------------------------------------------------|--------------------------------------|-----------------------------------------------------------------------------|----------------------------------------------------------------------------------------------------|--------------|
| <b>Fischgrund 2018</b> | 225 | CLBP ≥6 months, not responded to conservative treatment, Type 1 or Type 2 Modic changes required at the proposed treatment levels | No diagnostic block for inclusion | RD 46.9 (range 26–69); Sham 47.1 (range 25–69) | VAS RD 6.73 (1.38); Sham 6.64 (1.34) | Thermal ablation at the terminus of the basivertebral nerve 85°C for 15 min | Same procedure as RD but only docking introducer cannula 1–2 mm into the pedicle and simulating RD | Not reported |
|------------------------|-----|-----------------------------------------------------------------------------------------------------------------------------------|-----------------------------------|------------------------------------------------|--------------------------------------|-----------------------------------------------------------------------------|----------------------------------------------------------------------------------------------------|--------------|

CLBP, chronic low back pain; N, number of trials; NRS, numeric rating scale; RD, radiofrequency denervation; SD, standard deviation; VAS, visual analogue scale.
